# Supplementary material for: Metabolomics Combined with Transcriptomics Analysis Revealed the Amino Acids, Phenolic Acids, and Flavonol Derivatives Biosynthesis Network in Developing Rosa roxburghii Fruit
Source: Foods. 2022 Jun 1;11(11):1639. doi: 10.3390/foods11111639 (PMC9180193; doi:10.3390/foods11111639)
Supplement: Supplementary file 1 [file foods-11-01639-s001.zip]

Archive with 6 entries (6 files):
- Figure S1.tif
- Figure S2 .tif
- Figure S3.tif
- Figure S4.tif
- Supplementary Figures.pdf
- Supplementary Tables.xlsx
