# Supplementary material for: Metabolomics Combined with Transcriptomics Analysis Revealed the Amino Acids, Phenolic Acids, and Flavonol Derivatives Biosynthesis Network in Developing Rosa roxburghii Fruit
Source: Foods. 2022 Jun 1;11(11):1639. doi: 10.3390/foods11111639 (PMC9180193; doi:10.3390/foods11111639)
Supplement: Supplementary file 1 [file foods-11-01639-s001.zip › Supplementary Tables.xlsx]

## Sheet: Table S1
Table S1. List of metabolites identified in R. roxburghii.
Index	Q1 (Da)	Q3 (Da)	Molecular Weight (Da)	Formula	Ionization model	Compounds	Class I	Class II	CAS	Level	Rr5-30-1	Rr5-30-2	Rr5-30-3	Rr5-60-1	Rr5-60-2	Rr5-60-3	Rr5-90-1	Rr5-90-2	Rr5-90-3	cpd_ID	kegg_map
mws4052	102.05	56.05	101.048	C4H7NO2	[M+H]+	1-Aminocyclopropane-1-carboxylic acid	Others	Others	22059-21-8	A	633750	681190	629710	1733800	1665000	1496700	1649500	1474000	1328000	C01234	ko00270,ko01100,ko01110
pme3017	104.07	58	103.063	C4H9NO2	[M+H]+	2-Aminoisobutyric acid	Amino acids and derivatives	Amino acids and derivatives	62-57-7	A	3143000	3315600	3160200	859950	921630	931800	1444000	1355400	1358800	C03665	--
pme3011	104.07	68.8	103.063	C4H9NO2	[M+H]+	γ-Aminobutyric acid	Organic acids	Organic acids	56-12-2	B	690440	697380	678640	877660	829070	805890	1891200	1740400	1686300	C00334	ko00250,ko00330,ko00410,ko00650,ko00760,ko01100
pme3033	104.07	86	103.063	C4H9NO2	[M+H]+	N,N-Dimethylglycine	Amino acids and derivatives	Amino acids and derivatives	1118-68-9	A	551370	515880	547090	503850	515700	529140	1133400	1065600	1022500	C01026	ko00260,ko01100
mws0576	103.04	59.1	104.047	C4H8O3	[M-H]-	3-Hydroxybutyrate	Organic acids	Organic acids	300-85-6	B	9	9	9	226370	179350	192940	508960	503310	487320	--	--
mws0574	103.04	57	104.047	C4H8O3	[M-H]-	α-Hydroxyisobutyric acid	Organic acids	Organic acids	594-61-6	B	9	9	9	6815	9980.4	7956.8	17344	14866	15185	--	--
pme1975	103	59	104.06	C3H4O4	[M-H]-	Malonic acid	Organic acids	Organic acids	141-82-2	B	1497200	1554300	1573000	371760	447690	392320	264390	237310	213490	--	--
pme0010	106	60	105.043	C3H7NO3	[M+H]+	L-Serine	Amino acids and derivatives	Amino acids and derivatives	56-45-1	A	4921600	5228400	4641000	383370	383080	400390	222600	202910	203000	C00065	ko00260,ko00261,ko00270,ko00460,ko00600,ko00630,ko00920,ko00970,ko01100,ko01110,ko01200,ko01230,ko01502,ko02010
mws0255	112.05	95	111.043	C4H5N3O	[M+H]+	Cytosine	Nucleotides and derivatives	Nucleotides and derivatives	71-30-7	B	155450	163910	179470	334850	296850	329620	223410	224220	253690	C00380	ko00240,ko01100
pme2122	112.09	95	111.08	C5H9N3	[M+H]+	Histamine	Amino acids and derivatives	Amino acids and derivatives	51-45-6	A	129260	125090	124920	269120	255440	259360	216710	202670	206780	C00388	ko00340,ko01100,ko01110
mws0177	111.01	67	112.016	C5H4O3	[M-H]-	2-Furanoic acid	Organic acids	Organic acids	88-14-2	B	9	9	9	22209	15904	16355	63324	55776	42598	--	--
pme0257	111.02	80	112.027	C4H4N2O2	[M-H]-	Uracil	Nucleotides and derivatives	Nucleotides and derivatives	66-22-8	B	198670	171990	207530	126190	108420	115360	84101	99023	99904	C00106	ko00240,ko00410,ko00770,ko01100
pme0275	115.05	97	115.04	C5H7O3-	[M]-	4-Oxopentanoate	Organic acids	Organic acids	123-76-2	B	6648.6	14144	11743	8880.3	10922	8020.5	6789.5	6170.6	6282.7	--	--
pme0006	116.07	70.1	115.063	C5H9NO2	[M+H]+	L-Proline	Amino acids and derivatives	Amino acids and derivatives	147-85-3	A	41498000	39349000	40824000	33880000	33157000	33530000	43642000	45507000	44809000	C00148	ko00330,ko00332,ko00970,ko01100,ko01110,ko01230,ko02010
mws0376	115	71	116.011	C4H4O4	[M-H]-	Fumaric acid	Organic acids	Organic acids	110-17-8	A	9	9	9	315330	307910	300810	542930	543870	617750	C00122	ko00020,ko00190,ko00220,ko00250,ko00350,ko00360,ko00620,ko00650,ko00760,ko01100,ko01110,ko01200
mws0823	115.04	71	116.047	C5H8O3	[M-H]-	3-Methyl-2-Oxobutanoic acid	Organic acids	Organic acids	759-05-7	B	68262	62748	67292	55005	49610	55005	37654	36188	28086	C00141	ko00280,ko00290,ko00770,ko00966,ko01100,ko01110,ko01210,ko01230
pmb1096	118.07	91	117.058	C8H7N	[M+H]+	Indole	Alkaloids	Plumerane	120-72-9	B	42852	49155	47303	123470	121880	122730	95219	84898	87636	C00463	ko00380,ko00400,ko00402,ko01100,ko01110
mws0256	118.09	72.1	117.079	C5H11NO2	[M+H]+	L-Valine	Amino acids and derivatives	Amino acids and derivatives	72-18-4	A	3186400	2803500	3252600	2898300	2926200	2853100	7317400	6730600	6818200	C00183	ko00280,ko00290,ko00311,ko00460,ko00770,ko00966,ko00970,ko01100,ko01110,ko01210,ko01230,ko02010
mws0191	118.09	59	117.079	C5H11NO2	[M+H]+	Betaine	Alkaloids	Alkaloids	107-43-7	B	3981600	3463300	3453800	3047400	3222700	3436100	1830300	1568000	1553200	C00719	ko00260,ko01100,ko02010
pme0120	118.09	101	117.079	C5H11NO2	[M+H]+	5-Aminovaleric acid	Amino acids and derivatives	Amino acids and derivatives	660-88-8	A	26732	21419	27854	93830	95766	85815	208070	168700	189690	C00431	ko00310,ko00330,ko01100
mws0192	117.02	73	118.027	C4H6O4	[M-H]-	Succinic acid	Organic acids	Organic acids	110-15-6	A	4173900	3910400	4491300	3462600	3534800	3218300	3952000	3796600	3575900	C00042	ko00020,ko00190,ko00250,ko00310,ko00350,ko00360,ko00620,ko00630,ko00640,ko00650,ko00760,ko00920,ko01100,ko01110,ko01200
mws0470	117.02	73	118.027	C4H6O4	[M-H]-	Methylmalonic acid	Organic acids	Organic acids	516-05-2	A	4161700	3735400	4394500	3267000	3406800	2904900	3857700	3803300	3457100	C02170	ko00240,ko00280,ko00640,ko01100
pme3096	118	74	119.022	C3H5NO4	[M-H]-	Aminomalonic acid	Organic acids	Organic acids	1068-84-4	A	3014200	2633200	3219800	2349100	2492500	2218800	2730900	2621000	2302200	C00872	--
mws0230	120.07	74	119.058	C4H9NO3	[M+H]+	L-(-)-Threonine	Amino acids and derivatives	Amino acids and derivatives	72-19-5	A	5309500	4926500	4728900	1088700	1199100	1104500	1423100	1305000	1329400	C00188	ko00260,ko00261,ko00290,ko00860,ko00970,ko01100,ko01110,ko01230,ko02010
pmp001287	120.08	103.05	119.073	C8H9N	[M+H]+	N-Benzylmethylene isomethylamine	Alkaloids	Alkaloids	-	A	3369700	3159600	3487700	3528000	3547500	3258000	5510800	5301400	5154500	--	--
pma0134	121.04	93.06	120.042	C4H8O4	[M+H]+	D(-)-Threose	Others	Saccharides and Alcohols	95-43-2	B	16381	15746	12136	31989	30295	33124	54826	55443	91927	--	--
pme0241	123.04	79	122.037	C7H6O2	[M+H]+	Benzoic acid	Phenolic acids	Phenolic acids	65-85-0	B	28487	32664	21310	9	9	13699	15844	11842	12712	C00180	ko00360,ko01100,ko01110
mws0628	121.03	92	122.037	C7H6O2	[M-H]-	4-Hydroxybenzaldehyde	Phenolic acids	Phenolic acids	123-08-0	B	57774	42561	34956	26463	25319	32322	57758	59974	133570	C00633	ko01100
mws0133	123.06	79.9	122.048	C6H6N2O	[M+H]+	Nicotinamide	Others	Vitamin	98-92-0	B	585960	525770	619810	360190	339190	326550	356580	357630	373630	C00153	ko00760,ko01100
pme0490	124.04	78	123.032	C6H5NO2	[M+H]+	Nicotinic acid	Others	Vitamin	59-67-6	B	84983	63755	70301	284380	281400	292540	219250	187630	193640	C00253	ko00760,ko00960,ko01100,ko01110
mws0236	124.01	80	125.015	C2H7NO3S	[M-H]-	2-Aminoethanesulfonic acid	Organic acids	Organic acids	107-35-7	B	5558.4	6984	3681.4	16071	13811	14463	17685	16368	14555	C00245	ko00430,ko00920,ko01100,ko02010
mws0572	126.07	109	125.059	C5H7N3O	[M+H]+	5-Methylcytosine	Nucleotides and derivatives	Nucleotides and derivatives	554-01-8	B	9	9	9	6079.5	5515.9	6678.1	7950.7	7260.2	5983.1	C02376	ko00240,ko01100
pmb0302	126.1	96	125.1	C2H8NO3P	[M+H]+	2-Aminoethylphosphonate	Lipids	Glycerol ester	2041-14-7	B	5664.1	7104.2	4691.1	13272	9296.1	11829	19434	14607	15682	C03557	ko00440,ko01100,ko02010
pmp001086	127.04	97	126.032	C6H6O3	[M+H]+	5-Hydroxymethylfurfural	Phenolic acids	Phenolic acids	67-47-0	B	1291800	1396100	1448500	1259600	1444700	1126300	778000	513670	802860	C11101	--
mws0251	127.05	110	126.043	C5H6N2O2	[M+H]+	Thymine	Nucleotides and derivatives	Nucleotides and derivatives	65-71-4	B	9	9	9	42998	36764	50329	121070	106440	103540	C00178	ko00240,ko01100
Rfmb319	130.09	84.08	129.079	C6H11NO2	[M+H]+	Pipecolic acid	Amino acids and derivatives	Amino acids and derivatives	4043-87-2	A	2653200	2575000	2809800	9722400	9944400	10824000	10261000	12973000	14068000	--	--
mws0425	129.02	85	130.027	C5H6O4	[M-H]-	Citraconic acid	Organic acids	Organic acids	498-23-7	B	303360	346930	392770	4291500	3896600	3562000	2283200	2212800	3139100	C02226	ko00290,ko00660,ko01100,ko01210
mws0216	132.07	86	131.058	C5H9NO3	[M+H]+	Trans-4-Hydroxy-L-proline	Amino acids and derivatives	Amino acids and derivatives	51-35-4	B	202520	173320	157950	177530	198510	197150	306250	303550	315500	C01157	ko00330,ko01100,ko02010
pme0274	132.1	69	131.095	C6H13NO2	[M+H]+	6-Aminocaproic acid	Organic acids	Organic acids	60-32-2	A	22814	33329	41186	33974	28689	12953	46745	89996	96802	C02378	ko01100
mws1587	132.1	86	131.095	C6H13NO2	[M+H]+	α-Aminocaproic acid	Amino acids and derivatives	Amino acids and derivatives	327-57-1	A	1172400	956200	1044800	1081300	1093900	1186800	3249000	2813100	2653700	--	--
mws0227	132.1	86.2	131.095	C6H13NO2	[M+H]+	L-Leucine	Amino acids and derivatives	Amino acids and derivatives	61-90-5	A	66567000	60104000	58460000	55717000	57380000	56555000	77988000	80982000	69457000	C00123	ko00280,ko00290,ko00966,ko00970,ko01100,ko01110,ko01210,ko01230,ko02010
pme2679	132	86	131.095	C6H13NO2	[M+H]+	L-Allo-Isoleucine	Amino acids and derivatives	Amino acids and derivatives	1509-34-8	A	15878000	21010000	22956000	14924000	13802000	7019200	25674000	39150000	42891000	C21096	--
pme3034	131.04	69	132.042	C5H8O4	[M-H]-	ethylmalonate	Organic acids	Organic acids	601-75-2	B	15160	11875	12888	13152	17962	15324	23983	22508	24193	--	--
pme0243	131.04	87	132.042	C5H8O4	[M-H]-	Glutaric acid	Organic acids	Organic acids	110-94-1	B	463450	401140	426140	531900	488040	444220	744920	669490	696160	C00489	ko00071,ko00310,ko01100
mws0473	131.03	87	132.042	C5H8O4	[M-H]-	2-Methylsuccinic acid	Organic acids	Organic acids	498-21-5	A	2237400	2129500	2278500	2534300	2543900	2473100	2413600	2607200	2621600	--	--
mws0001	133.06	74	132.054	C4H8N2O3	[M+H]+	L-Asparagine	Amino acids and derivatives	Amino acids and derivatives	70-47-3	A	58147000	64430000	62550000	11178000	12371000	11915000	2130000	2081000	1917700	C00152	ko00250,ko00460,ko00970,ko01100,ko01110,ko01230
mws0341	131.07	85	132.079	C6H12O3	[M-H]-	(S)-(-)-2-Hydroxyisocaproic acid	Organic acids	Organic acids	13748-90-8	B	35636	34111	36280	60314	68300	66414	157160	152270	157010	--	--
mws0219	132.03	88	133.038	C4H7NO4	[M-H]-	L-AsparticAcid	Amino acids and derivatives	Amino acids and derivatives	56-84-8	A	2598800	2730100	2664900	3114500	3223600	3276100	2517400	2490900	2579600	C00049	ko00220,ko00250,ko00260,ko00261,ko00270,ko00300,ko00340,ko00410,ko00460,ko00710,ko00760,ko00770,ko00970,ko01100,ko01110,ko01200,ko01210,ko01230,ko02010
pmb0374	136.06	118.9	135.054	C5H5N5	[M+H]+	Aminopurine	Alkaloids	Alkaloids	452-06-2	B	6458	7018.1	7394.5	7858.4	7829.1	8855.5	39385	39684	32413	--	--
pme0040	136.06	119	135.054	C5H5N5	[M+H]+	Adenine	Nucleotides and derivatives	Nucleotides and derivatives	73-24-5	B	466560	443150	450930	305730	291760	330130	919120	797130	890190	C00147	ko00230,ko00908,ko01100
pme0033	137.05	119	136.039	C5H4N4O	[M+H]+	Hypoxanthine	Nucleotides and derivatives	Nucleotides and derivatives	68-94-0	B	7715.7	9971.9	10642	12103	14074	17866	18831	16567	20057	C00262	ko00230,ko01100
pme1173	137.05	110	136.039	C5H4N4O	[M+H]+	Allopurinol	Nucleotides and derivatives	Nucleotides and derivatives	315-30-0	B	9	9	9	4424.7	5392.4	4351.2	24569	20328	19983	--	--
Hmbn002174	135.05	120.02	136.053	C8H8O2	[M-H]-	4-Hydroxyacetophenone	Phenolic acids	Phenolic acids	99-93-4	B	5258.7	8193.3	9941.9	19860	28675	19591	18681	9931.5	10486	--	--
mws1336	138.05	120	137.048	C7H7NO2	[M+H]+	4-Aminobenzoic acid	Phenolic acids	Phenolic acids	150-13-0	A	9	9	9	9	9	9	9	9	9	--	--
mws0146	138.05	78	137.048	C7H7NO2	[M+H]+	Nicotinic Acid Methyl Ester(Methyl Nicotinate)	Alkaloids	Alkaloids	93-60-7	B	21632	17341	17110	845560	864860	800520	482800	516700	494910	--	--
pme1002	138.09	103	137.084	C8H11NO	[M+H]+	L-Tyramine	Amino acids and derivatives	Amino acids and derivatives	51-67-2	B	4430.6	3452.5	3051.5	4926.8	5447	6651.8	18503	16200	20749	C00483	ko00350,ko00950,ko01100,ko01110
Lmgn001670	137.03	108.02	138.032	C7H6O3	[M-H]-	Salicylic acid	Phenolic acids	Phenolic acids	69-72-7	A	55108	49646	52968	69348	66796	59455	52617	62256	96874	C00805	ko00360,ko01100,ko01110,ko04075
pme2482	139.04	92.8	138.032	C7H6O3	[M+H]+	Protocatechuic aldehyde	Phenolic acids	Phenolic acids	139-85-5	A	390680	418190	307820	148690	145340	130560	89995	99075	197840	C16700	ko00950
pmb0764	144.05	113.2	143.04	C6H9NOS	[M+H]+	4-Methyl-5-thiazoleethanol	Others	Others	137-00-8	B	7741.7	6041.4	8107.3	165540	159750	173850	360550	358500	363880	C04294	ko00730,ko01100
Rfmb320	144.1	84.08	143.095	C7H13NO2	[M+H]+	1,2-N-Methylpipecolic acid	Amino acids and derivatives	Amino acids and derivatives	7730-87-2	B	503090	531720	635090	573410	480080	457600	323780	438920	352340	--	--
pme0295	146.08	86	145.074	C6H11NO3	[M+H]+	4-Acetamidobutyric acid	Organic acids	Organic acids	3025-96-5	A	658750	513830	556150	54117	57221	47686	79593	78518	74003	C02946	ko00330,ko01100
mws0567	146.09	87	145.085	C5H11N3O2	[M+H]+	4-Guanidinobutyric acid	Organic acids	Organic acids	463-00-3	B	9	9	9	88832	96528	90638	67892	66160	61162	C01035	ko00330,ko01100
pme2380	145	101	146.022	C5H6O5	[M-H]-	A-Ketoglutaric acid	Organic acids	Organic acids	328-50-7	B	598200	798730	802710	1937500	1784500	1897100	2249700	2404700	2870500	--	--
mws0208	145.05	101	146.058	C6H10O4	[M-H]-	Adipic Acid	Organic acids	Organic acids	124-04-9	B	196670	156210	202770	143820	145440	143210	845380	832830	881780	C06104	ko01100
pme0026	147.11	84	146.106	C6H14N2O2	[M+H]+	L-(+)-Lysine	Amino acids and derivatives	Amino acids and derivatives	56-87-1	A	832950	885450	809970	693750	700720	723150	4564100	4391600	4755100	C00047	ko00300,ko00310,ko00780,ko00960,ko00970,ko01100,ko01110,ko01210,ko01230,ko02010
pme0014	148.06	84	147.053	C5H9NO4	[M+H]+	L-Glutamic acid	Amino acids and derivatives	Amino acids and derivatives	56-86-0	A	37381000	39030000	38105000	30982000	32760000	32809000	20003000	19494000	19893000	C00025	ko00220,ko00250,ko00330,ko00332,ko00340,ko00430,ko00480,ko00630,ko00650,ko00660,ko00860,ko00910,ko00970,ko01100,ko01110,ko01200,ko01210,ko01230,ko02010
mws1050	148.06	88	147.053	C5H9NO4	[M+H]+	O-Acetylserine	Amino acids and derivatives	Amino acids and derivatives	5147-00-2	B	1171800	1166800	1246000	959360	929170	940230	801240	794280	760800	C00979	ko00270,ko00908,ko00920,ko01100,ko01110,ko01200,ko01230,ko04122
pmp001285	149.02	65.04	148.016	C8H4O3	[M+H]+	Phthalic anhydride	Phenolic acids	Phenolic acids	85-44-9	A	1006900	854110	925320	1110300	1080700	1006300	997920	876070	1001700	--	--
mws2213	147.05	77.01	148.052	C9H8O2	[M-H]-	Cinnamic acid	Phenolic acids	Phenolic acids	140-10-3	B	1412.7	989	1808	496.1	445.08	610.57	16042	15793	11902	C00423	ko00130,ko00360,ko00940,ko00998,ko01100,ko01110
pme3154	147.07	59	148.074	C6H12O4	[M-H]-	(Rs)-Mevalonic acid	Organic acids	Organic acids	150-97-0	A	109600	79724	118000	239220	210140	222000	285630	256140	272080	--	--
pme1210	150.06	61	149.051	C5H11NO2S	[M+H]+	L-Methionine	Amino acids and derivatives	Amino acids and derivatives	63-68-3	A	16175	51154	60539	363290	328780	411520	2924200	2839600	2294200	C00073	ko00270,ko00966,ko00970,ko01100,ko01110,ko01210,ko01230
mws0847	150.08	133	149.07	C6H7N5	[M+H]+	1-Methyladenine	Nucleotides and derivatives	Nucleotides and derivatives	5142-22-3	A	75998	75609	79954	98458	112450	108040	55633	67860	61584	C02216	--
mws1499	149.05	59.01	150.053	C5H10O5	[M-H]-	D-(-)-Arabinose	Others	Saccharides and Alcohols	10323-20-3	A	178620	152850	197400	364880	358800	362910	516170	567450	616480	--	--
pme1109	152.06	135	151.049	C5H5N5O	[M+H]+	Guanine	Nucleotides and derivatives	Nucleotides and derivatives	73-40-5	B	136690	111400	120370	153850	154680	173620	184050	168250	147880	C00242	ko00230,ko01100
pme0183	152.06	135	151.049	C5H5N5O	[M+H]+	2-Hydroxy-6-aminopurine	Nucleotides and derivatives	Nucleotides and derivatives	3373-53-3	B	36496	28953	38860	55428	40255	53641	99484	97621	93694	--	--
pme0256	151.03	151	152.033	C5H4N4O2	[M-H]-	Xanthine	Nucleotides and derivatives	Nucleotides and derivatives	69-89-6	B	9	9	9	14446	26730	12002	17095	23205	36842	C00385	ko00230,ko00232,ko01100,ko01110
mws0458	151.04	136	152.047	C8H8O3	[M-H]-	Vanillin	Phenolic acids	Phenolic acids	121-33-5	B	106740	108770	154960	116530	97836	107600	171240	142810	183640	C00755	ko00998,ko01100,ko01110
mws0183	153.02	109	154.027	C7H6O4	[M-H]-	Protocatechuic acid	Phenolic acids	Phenolic acids	99-50-3	A	511360	478020	457000	88145	90390	108590	54392	59320	105700	C00230	ko01100,ko01110
mws0254	156.08	110	155.069	C6H9N3O2	[M+H]+	L-Histidine	Amino acids and derivatives	Amino acids and derivatives	71-00-1	B	96291	104680	87411	60715	51111	56720	350470	306860	297620	C00135	ko00340,ko00410,ko00970,ko01100,ko01110,ko01230,ko02010
pme2589	159.1	87	160.037	C6H8O5	[M-H]-	Oxoadipic acid	Organic acids	Organic acids	3184-35-8	B	35745	40199	40627	35475	32281	33530	41004	33583	34549	C00322	ko00300,ko00310,ko00380,ko01100,ko01110,ko01210,ko01230
pme3382	160.06	98	161.069	C6H11NO4	[M-H]-	N-Acetylthreonine	Amino acids and derivatives	Amino acids and derivatives	17093-74-2	B	52943	54070	55634	67639	87414	70222	97123	80044	83001	--	--
pme2914	161.05	99	162.053	C6H10O5	[M-H]-	3-Hydroxy-3-methylpentane-1,5-dioic acid	Amino acids and derivatives	Amino acids and derivatives	503-49-1	A	9	9	9	1792800	1968400	1817200	24915000	26653000	26992000	C03761	--
pmf0440	163.08	91.1	162.068	C10H10O2	[M+H]+	4-MethoxycinnaMaldehyde	Phenolic acids	Phenolic acids	1963-36-6	B	76282	77305	75837	98254	76680	71341	72482	61786	80325	--	--
mws1478	163.12	130	162.116	C10H14N2	[M+H]+	Nicotine	Alkaloids	Alkaloids	54-11-5	A	323270	296690	356060	823270	727110	903280	695250	552480	498430	C00745	ko00960,ko01110
pme2758	162.04	144	163.048	C5H9NO5	[M-H]-	4-Hydroxy-L-glutamic acid	Amino acids and derivatives	Amino acids and derivatives	3913-68-6	B	3407.1	5616.4	4296	4644.4	6551.7	7143	9319.1	6139.3	6002.7	C03079	--
pme1419	164.07	104	163.067	C6H13NO2S	[M+H]+	Methionine methyl ester	Amino acids and derivatives	Amino acids and derivatives	10332-17-9	B	9	9	9	71260	71728	77143	76255	79755	76105	--	--
pmb0142	165.1	95.2	164.047	C9H8O3	[M+H]+	Caffeic aldehyde	Phenolic acids	Phenolic acids	141632-15-7	B	71019	67077	75543	44279	41805	46811	28667	31378	32919	C10945	ko00940,ko01110
pme1436	163.04	119.05	164.047	C9H8O3	[M-H]-	p-Coumaric acid	Phenolic acids	Phenolic acids	-	B	235990	176930	182860	63322	68605	79439	894120	910550	913020	C00811	ko00130,ko00350,ko00940,ko00950,ko00998,ko01100,ko01110
pme3083	164.04	120	165.043	C8H7NO3	[M-H]-	2-(Formylamino)benzoic acid	Phenolic acids	Phenolic acids	3342-77-6	B	22766	24846	31232	23280	17234	17945	112800	104690	99368	C05653	ko00380,ko01100
pme2617	166.05	102	165.046	C5H11NO3S	[M+H]+	Methionine sulfoxide	Amino acids and derivatives	Amino acids and derivatives	62697-73-8	B	15074000	14804000	15689000	12714000	13080000	13156000	15264000	14859000	15531000	--	--
pme3968	166.07	149.05	165.065	C6H7N5O	[M+H]+	7-Methylguanine	Nucleotides and derivatives	Nucleotides and derivatives	578-76-7	B	39402	37784	32264	50726	52681	50363	54887	55284	49186	C02242	--
pme0021	166.09	120.08	165.07	C9H11NO2	[M+H]+	L-Phenylalanine	Amino acids and derivatives	Amino acids and derivatives	63-91-2	A	6416400	5645900	5974700	6046700	6099800	5926300	9605500	9788800	9613700	C00079	ko00360,ko00400,ko00460,ko00940,ko00960,ko00966,ko00970,ko00998,ko01100,ko01110,ko01210,ko01230,ko02010
pme0281	165.02	121	166.027	C8H6O4	[M-H]-	Terephthalic acid	Phenolic acids	Phenolic acids	100-21-0	A	833640	858950	897000	1109100	1074700	1005000	1524100	1274700	1543000	C06337	ko01100
pme0282	165.02	77	166.027	C8H6O4	[M-H]-	Phthalic acid	Organic acids	Organic acids	88-99-3	A	59180	52904	67831	68766	57185	67508	95288	85168	114940	C01606	ko01100,ko02010
mws0344	165.04	75	166.048	C5H10O6	[M-H]-	D-Xylonic acid	Organic acids	Organic acids	526-91-0	B	9902200	8289800	8917200	7550500	7331000	8610300	8447500	10067000	8876700	--	--
Lmnp001551	167.07	91.05	166.063	C9H10O3	[M+H]+	3-Methoxy-4-hydroxy-acetophenone	Phenolic acids	Phenolic acids	-	B	72488	67442	73640	22062	26039	17557	10175	7968.1	9	--	--
mws0467	165.06	119	166.063	C9H10O3	[M-H]-	3-(4-Hydroxyphenyl)-propionic acid	Phenolic acids	Phenolic acids	501-97-3	B	705430	690850	745050	722020	766620	659360	605730	593210	555240	C01744	--
pmn001681	165.09	149.06	166.099	C10H14O2	[M-H]-	1-(4-Methoxyphenyl)-1-propanol	Phenolic acids	Phenolic acids	5349-60-0	B	37113	34588	34570	27231	27465	22260	30345	28316	28470	--	--
pmc0274	167.1	121.1	166.1	C6H6N4S	[M+H]+	6-Methylmercaptopurine	Nucleotides and derivatives	Nucleotides and derivatives	50-66-8	B	5714700	5131900	5710200	5673100	5606600	5673600	9227900	8894500	8613500	C16614	--
pme2598	167.1	123	168.042	C8H8O4	[M-H]-	3,4-Dihydroxybenzeneacetic acid	Phenolic acids	Phenolic acids	102-32-9	B	108420	128640	146340	102790	111840	109650	128900	165910	135350	--	--
pme1383	170.08	134.1	169.074	C8H11NO3	[M+H]+	Pyridoxine	Others	Vitamin	65-23-6	B	1219100	1059500	1115400	783230	798960	813340	685240	621820	613160	C00314	ko00750,ko01100
mws0279	170.09	96	169.085	C7H11N3O2	[M+H]+	3-N-Methyl-L-histidine	Amino acids and derivatives	Amino acids and derivatives	-	B	9	9	2904	1476	1262.2	1752.6	3777	5497.4	2748.3	--	--
pme0181	170.09	124	169.085	C7H11N3O2	[M+H]+	1-Methylhistidine	Amino acids and derivatives	Amino acids and derivatives	368-16-1	B	206790	207360	192820	115100	99650	96180	159410	157030	162710	C01152	ko00340,ko01100
mws0024	169.01	125	170.022	C7H6O5	[M-H]-	Gallic acid	Tannins	Tannin	149-91-7	A	15579000	14489000	15763000	3034600	2873300	3041000	3588100	3539300	3565100	C01424	--
pme0124	173.09	115.5	172.085	C7H12N2O3	[M+H]+	Glycyl-L-proline	Amino acids and derivatives	Amino acids and derivatives	704-15-4	B	23308	26619	20727	19552	20039	17122	54100	52016	51001	--	--
pme0253	174.11	86	173.105	C8H15NO3	[M+H]+	N-Acetyl-L-leucine	Amino acids and derivatives	Amino acids and derivatives	1188-21-2	B	5614.8	4005.8	5439.8	9	9	9	8092.4	4058	9020.6	C02710	--
mws0154	173.05	93	174.053	C7H10O5	[M-H]-	Shikimic acid	Organic acids	Organic acids	138-59-0	A	22675000	19337000	20324000	4253700	4042800	4219800	644530	699840	663240	C00493	ko00400,ko01100,ko01110,ko01230
mws0260	175.12	116	174.112	C6H14N4O2	[M+H]+	L-(+)-Arginine	Amino acids and derivatives	Amino acids and derivatives	74-79-3	B	3805200	3050500	3808000	1715200	1663700	1726500	14969000	13353000	12558000	C00062	ko00220,ko00261,ko00330,ko00472,ko00970,ko01100,ko01110,ko01230,ko02010
pme2559	174.04	88	175.048	C6H9NO5	[M-H]-	N-Acetylaspartate	Amino acids and derivatives	Amino acids and derivatives	997-55-7	B	58724	73486	72481	121970	124760	91163	103290	103890	142700	C01042	ko00250,ko01100
pme0008	176.1	113	175.096	C6H13N3O3	[M+H]+	L-Citrulline	Amino acids and derivatives	Amino acids and derivatives	372-75-8	B	902610	862140	962870	299730	223760	271620	187820	183010	231810	C00327	ko00220,ko01100,ko01110,ko01230
Hmfn00531	175.02	87.01	176.032	C6H8O6	[M-H]-	L-Ascorbic acid	Others	Vitamin	50-81-7	A	9	9	9	559630	513240	588970	706710	1283600	968660	C00072	ko00053,ko00480,ko01100,ko01110
mws1500	177.09	130.9	176.084	C11H12O2	[M+H]+	Ethyl cinnamate	Phenolic acids	Phenolic acids	103-36-6	A	4584700	4344800	4742000	1733100	1758000	1715100	1548100	1626900	1584400	C06359	--
pmb3101	175.1	115	176.1	C7H12O5	[M-H]-	2-Isopropylmalate	Organic acids	Organic acids	-	A	304910	336500	298270	122890	157070	146780	365170	433550	370140	C02504	ko00290,ko00620,ko01100,ko01110,ko01210,ko01230
Hmgp002428	179.07	119.05	178.063	C10H10O3	[M+H]+	4-Hydroxy-3-methoxycinnamaldehyde	Phenolic acids	Phenolic acids	-	B	67812	76011	91195	31090	33758	24614	42514	29356	28653	--	--
pmb2795	177	145	178.063	C10H10O3	[M-H]-	4-Methoxycinnamic acid	Phenolic acids	Phenolic acids	830-09-1	B	20387	18241	22334	2414.4	2358.8	1452.8	17944	16066	18242	--	--
mws1200	177.06	145	178.063	C10H10O3	[M-H]-	Trans-4-Hydroxycinnamic Acid Methyl Ester	Phenolic acids	Phenolic acids	19367-38-5	B	29262	28028	30374	2989.9	2864.4	3725.8	31448	26930	25338	--	--
pme3255	179.11	123	178.099	C11H14O2	[M+H]+	Methyleugenol	Phenolic acids	Phenolic acids	93-15-2	B	9	9	9	9	9	9	14910	23062	20923	C10454	ko00940
pmb0786	180	162	179	C6H13NO5	[M+H]+	Glucosamine	Others	Saccharides and Alcohols	3416-24-8	B	909360	957830	995290	859370	855280	877250	1064800	1042800	1222400	C00329	ko00520,ko01100
mws2212	179.03	135.05	180.042	C9H8O4	[M-H]-	Caffeic acid	Phenolic acids	Phenolic acids	331-39-5	A	32464	41350	40761	68134	105750	43148	195740	237490	211950	C01197	ko00940,ko01100,ko01110
mws4170	179.06	59.01	180.063	C6H12O6	[M-H]-	D-Glucose	Others	Saccharides and Alcohols	14431-43-7	A	2752600	2658800	2684000	14604000	15658000	15923000	15919000	15142000	15061000	C00031	ko00010,ko00030,ko00052,ko00500,ko00520,ko00901,ko01100,ko01110,ko02010,ko04933
mws0663	181.07	124	180.065	C7H8N4O2	[M+H]+	1,7-Dimethylxanthine	Nucleotides and derivatives	Nucleotides and derivatives	611-59-6	B	9	9	9	17119	21138	19849	31716	37280	31309	C13747	ko00232,ko01100,ko01110
mws0250	182.08	136.1	181.074	C9H11NO3	[M+H]+	L-(-)-Tyrosine	Amino acids and derivatives	Amino acids and derivatives	60-18-4	A	10500000	8099400	9207800	9098300	8861900	9948400	27295000	22493000	21324000	C00082	ko00130,ko00261,ko00350,ko00360,ko00400,ko00460,ko00730,ko00940,ko00950,ko00965,ko00966,ko00970,ko00998,ko01100,ko01110,ko01210,ko01230
pme2596	184.06	148	183.053	C8H9NO4	[M+H]+	4-Pyridoxic acid	Others	Vitamin	82-82-6	B	55983	54522	53496	53830	58789	60635	52119	47969	53699	C00847	ko00750,ko01100
pme0309	183.03	124	184.037	C8H8O5	[M-H]-	Methyl gallate	Tannins	Tannin	99-24-1	A	14193000	12478000	13363000	902990	816800	913960	874340	777110	857900	--	--
pme2602	184	97	185.009	C3H8NO6P	[M-H]-	O-Phospho-L-serine	Amino acids and derivatives	Amino acids and derivatives	407-41-0	B	30265	32174	35009	31869	35188	34175	16144	10858	24146	C01005	ko00260,ko00270,ko00970,ko01100,ko01110,ko01200,ko01230
mws0752	185.15	185.16	186.162	C11H22O2	[M-H]-	Undecylic Acid	Lipids	Free fatty acids	112-37-8	B	307040	321200	325660	321420	316530	318300	365950	316650	331680	--	--
pme0137	187.07	125	188.08	C7H12N2O4	[M-H]-	N-α-Acetyl-L-glutamine	Amino acids and derivatives	Amino acids and derivatives	2490-97-3	A	734760	647350	835740	2062400	2026300	1926300	2431500	2223900	2460800	--	--
mws0237	187.1	125	188.105	C9H16O4	[M-H]-	Anchoic Acid	Organic acids	Organic acids	123-99-9	A	752180	774380	791170	610940	579000	583150	562580	537760	683360	C08261	--
pme0122	189.12	126	188.116	C8H16N2O3	[M+H]+	N6-Acetyl-L-lysine	Amino acids and derivatives	Amino acids and derivatives	692-04-6	A	656760	602570	485190	131670	136990	104310	387540	430550	353720	C02727	ko00310,ko01100
pme3388	189.13	144	188.127	C7H16N4O2	[M+H]+	H-HomoArg-OH	Amino acids and derivatives	Amino acids and derivatives	156-86-5	A	33703	36095	43410	34394	42484	36704	165790	145010	157180	C01924	--
pme0075	188.1	128	189.064	C7H11NO5	[M-H]-	N-Acetyl-L-glutamic acid	Amino acids and derivatives	Amino acids and derivatives	1188-37-0	B	201950	176050	237060	141700	151420	128890	63695	70912	70707	C00624	ko00220,ko01100,ko01110,ko01210,ko01230
mws0193	190.12	127	189.111	C7H15N3O3	[M+H]+	L-Homocitrulline	Amino acids and derivatives	Amino acids and derivatives	1190-49-4	B	264710	239640	246950	92777	68893	87619	114890	92853	94098	C02427	--
pme0278	191.1	128	190.095	C7H14N2O4	[M+H]+	2,6-Diaminooimelic acid	Amino acids and derivatives	Amino acids and derivatives	583-93-7	B	169540	153050	154570	66761	68476	67497	44658	43354	47412	C00666	ko00300,ko01100,ko01110,ko01230
pmb2561	190.1	84	191.1	C7H13NO3S	[M-H]-	N-Acetylmethionine	Amino acids and derivatives	Amino acids and derivatives	65-82-7	B	9	9	9	23514	17893	25229	60399	62768	57261	C02712	--
mws0281	191.02	111.01	192.027	C6H8O7	[M-H]-	Citric Acid	Organic acids	Organic acids	77-92-9	A	293960	245820	282920	304510	271680	317520	357890	346340	451960	C00158	ko00020,ko00250,ko00630,ko01100,ko01110,ko01200,ko01210,ko01230
Hmcp002123	193.05	178.02	192.042	C10H8O4	[M+H]+	6-Hydroxy-7-methoxycoumarin	Lignans and Coumarins	Coumarins	776-86-3	B	7109.1	8204	9438.9	8807.9	10580	9794.4	6217.3	4877.3	6278.3	--	--
mws0277	191.06	85	192.063	C7H12O6	[M-H]-	Quinic Acid	Organic acids	Organic acids	77-95-2	A	97835	97829	113730	688860	636480	617270	780950	840510	761820	C00296	ko00400,ko01100
mws1213	193.04	73	194.043	C6H10O7	[M-H]-	Aldehydo-D-galacturonate	Organic acids	Organic acids	-	A	542270	475380	485670	347090	304230	305650	287180	308730	277900	--	--
mws0014	193.05	134.01	194.058	C10H10O4	[M-H]-	Ferulic acid	Phenolic acids	Phenolic acids	537-98-4	B	28809	32120	26917	24888	17059	24454	122410	114920	118050	C01494	ko00940,ko01100,ko01110
pme0534	195.05	74.9	196.058	C6H12O7	[M-H]-	Gluconic acid	Others	Saccharides and Alcohols	526-95-4	A	1836600	1930900	1697000	4885800	4824400	4838900	6530800	6375900	6362500	C00257	ko00030,ko01100,ko01110,ko01200
pme3827	198.08	152.2	197.069	C9H11NO4	[M+H]+	3,4-Dihydroxy-DL-phenylalanine	Amino acids and derivatives	Amino acids and derivatives	63-84-3	B	9	9	9	9	38037	40851	126940	102770	83652	C00355	ko00350,ko00950,ko00965,ko01100,ko01110
mws5037	203.14	86.1	202.132	C9H18N2O3	[M+H]+	Alanylleucine	Amino acids and derivatives	Amino acids and derivatives	1999-42-4	B	111260	105420	129540	520520	473420	444010	244560	219440	249240	--	--
pme2060	204.25	136	203.117	C10H13N5	[M+H]+	N6-Isopentenyladenine	Nucleotides and derivatives	Nucleotides and derivatives	2365-40-4	B	3935.2	2839.5	3141.5	136180	132890	137980	1614700	1598100	1598500	C04083	ko00908,ko01110,ko04075
mws0282	203.08	116.05	204.09	C11H12N2O2	[M-H]-	L-Tryptophan	Amino acids and derivatives	Amino acids and derivatives	73-22-3	B	2406500	2295500	2384400	9733000	9521900	9361300	6931100	6516400	6057900	C00078	ko00260,ko00380,ko00400,ko00901,ko00966,ko00970,ko00998,ko01100,ko01110,ko01210,ko01230
mws2125	166.98	78.7	205.938	C3H4KO6P	[M-K]-	Phosphoenolpyruvic acid	Organic acids	Organic acids	4265-07-0	B	258950	275090	226330	73186	82795	86532	63167	60457	63425	--	--
mws1212	209.08	177.3	208.074	C11H12O4	[M+H]+	Methyl ferulate	Phenolic acids	Phenolic acids	2309-07-1	A	130730	125470	146980	30953	50594	45767	85661	85936	76165	--	--
pmb2620	207.07	133.1	208.074	C11H12O4	[M-H]-	3,4-Dimethoxycinnamic acid	Phenolic acids	Phenolic acids	14737-89-4	B	29918	36017	35730	9052.7	11250	9066.7	25055	22374	20926	--	--
mws0853	209.08	179	210.089	C11H14O4	[M-H]-	Sinapyl alcohol	Phenolic acids	Phenolic acids	537-33-7	B	7627.2	16374	12931	22280	15258	20242	90898	78631	69932	C02325	ko00940,ko01100,ko01110
pme0170	217.13	158	216.122	C8H16N4O3	[M+H]+	N-α-Acetyl-L-arginine	Amino acids and derivatives	Amino acids and derivatives	155-84-0	B	224400	172490	234390	210010	251960	273190	182720	114280	94890	--	--
pme2566	217.08	199	218.09	C8H14N2O5	[M-H]-	(5-L-Glutamyl)-L-amino acid	Amino acids and derivatives	Amino acids and derivatives	5875-41-2	B	71821	70968	81725	124540	115880	130630	166950	161620	179210	C03740	ko00480,ko01100
mws1337	220.12	202.1	219.111	C9H17NO5	[M+H]+	D-Pantothenic Acid	Others	Vitamin	79-83-4	A	4843000	4506000	4757500	4937200	4767200	4862000	3343800	3431800	3356500	C00864	ko00410,ko00770,ko01100,ko01110
pme2755	222	144	221.09	C8H15NO6	[M+H]+	N-Acetyl-D-glucosamine	Others	Saccharides and Alcohols	7512-17-6	B	511320	592060	560970	497660	498410	515300	571470	682390	654090	C00140	ko00520,ko01100,ko02010
mws5042	223.11	120.09	222.1	C11H14N2O3	[M+H]+	Glycylphenylalanine	Amino acids and derivatives	Amino acids and derivatives	721-66-4	A	38270	36675	36692	46707	55208	55272	203120	183910	174530	--	--
Hmgp005956	223.13	149.02	222.125	C13H18O3	[M+H]+	Dehydrovomifoliol	Terpenoids	Sesquiterpenoids	15764-81-5	B	192660	167800	198460	170640	171320	139480	140470	127630	147290	--	--
Hmcp003852	223.21	207.03	222.198	C15H26O	[M+H]+	Elemol	Others	Others	639-99-6	A	4016500	4052600	4265600	3859800	3978300	4047900	4089100	4219400	4525100	--	--
mws0520	224.09	136	223.084	C11H13NO4	[M+H]+	N-Acetyl-L-tyrosine	Amino acids and derivatives	Amino acids and derivatives	537-55-3	B	4190.2	3759.5	4599.3	2773	2767.6	3818.1	4967.3	6390.4	6075.7	--	--
pmp000452	225.15	85	224.141	C13H20O3	[M+H]+	Annuionone D	Others	Others	-	B	491800	508110	422880	760380	793630	897150	923150	958990	1071000	--	--
pme1194	228.1	112	227.091	C9H13N3O4	[M+H]+	Deoxycytidine	Nucleotides and derivatives	Nucleotides and derivatives	951-77-9	B	199640	141250	162980	347620	346470	411110	260050	278420	224410	C00881	ko00240,ko01100,ko02010
mws2105	229.09	211.1	228.079	C14H12O3	[M+H]+	Benzyl salicylate	Phenolic acids	Phenolic acids	118-58-1	B	9870.8	8571.5	9749.1	7055.1	5233.2	8664.2	7181.7	10891	12670	--	--
mws0119	227.2	227.2	228.209	C14H28O2	[M-H]-	Myristic Acid	Lipids	Free fatty acids	544-63-8	A	14059000	13821000	13736000	13062000	12811000	15545000	19236000	14470000	14973000	C06424	ko00061,ko01100
pmb0962	235.1	118.3	234.158	C10H22N2O4	[M+H]+	Lysine butyrate	Amino acids and derivatives	Amino acids and derivatives	80407-71-2	B	163510	139160	179930	184930	244130	140730	45073	40311	49604	--	--
mws4176	237.12	120.09	236.116	C12H16N2O3	[M+H]+	DL-Alanyl-DL-phenylalanine	Amino acids and derivatives	Amino acids and derivatives	1999-45-7	B	9395.2	9105.7	8491.5	16332	14182	16440	28355	31888	33516	--	--
Lmhn003240	237.04	121.03	238.048	C11H10O6	[M-H]-	Benzoylmalic acid	Phenolic acids	Phenolic acids	-	B	102330	77753	102110	174140	149400	193680	214850	230160	256170	--	--
pmn001669	237.08	147	238.084	C12H14O5	[M-H]-	Methyl sinapate	Phenolic acids	Phenolic acids	20733-94-2	B	5059.3	4871.6	6485.3	2644.3	1645.1	1371.2	3175.4	2434.7	2029.7	--	--
mws0221	241.03	152	240.024	C6H12N2O4S2	[M+H]+	L-(-)-Cystine	Amino acids and derivatives	Amino acids and derivatives	56-89-3	B	27156	16344	19313	64653	78840	82234	27204	28252	28850	C00491	ko00270,ko01100,ko02010
pme3732	244.09	112	243.086	C9H13N3O5	[M+H]+	Cytidine	Nucleotides and derivatives	Nucleotides and derivatives	65-46-3	A	832320	875550	876210	2851000	2714400	2647200	2111000	1966800	2013400	C00475	ko00240,ko01100,ko02010
mws0248	243.06	110	244.07	C9H12N2O6	[M-H]-	Uridine	Nucleotides and derivatives	Nucleotides and derivatives	58-96-8	B	33302	36119	41673	47827	40932	40784	74313	59837	85536	C00299	ko00240,ko01100,ko02010
pme2266	245.1	227	244.088	C10H16N2O3S	[M+H]+	Biotin	Others	Vitamin	58-85-5	B	33888	30695	39849	90822	60552	78677	116570	130410	144810	C00120	ko00780,ko01100,ko02010
pme3961	252.11	136	251.102	C10H13N5O3	[M+H]+	Deoxyadenosine	Nucleotides and derivatives	Nucleotides and derivatives	958-09-8	A	118300	111690	127910	179020	188570	174040	406980	385870	402170	C00559	ko00230,ko01100,ko02010
Lmhn003373	253.04	137.02	254.043	C11H10O7	[M-H]-	p-Hydroxybenzoylmalic acid	Phenolic acids	Phenolic acids	-	B	262230	257200	324490	673460	635640	600320	580560	670280	705360	--	--
mws0361	253.22	235.19	254.225	C16H30O2	[M-H]-	Palmitoleic Acid	Lipids	Free fatty acids	373-49-9	A	4162.2	2338.6	3117.1	1430.8	2159.3	2352.7	7068	7719.3	4355.8	C08362	ko00061
pma3101	256.2	124.1	256.082	C11H14NO6+	[M+H]+	Nicotinate D-ribonucleoside	Others	Vitamin	17720-18-2	B	13170000	14682000	15862000	18518000	19987000	19777000	15532000	13168000	12865000	C05841	ko00760,ko01100
pmn001578	255.23	255.23	256.24	C16H32O2	[M-H]-	Palmitic acid	Lipids	Free fatty acids	57-10-3	A	39043000	36305000	36190000	26796000	37413000	37599000	40038000	34375000	35576000	C00249	ko00061,ko00062,ko00071,ko00073,ko01040,ko01100,ko01212
mws0120	258.11	104.11	257.103	C8H20NO6P	[M+H]+	Choline alfoscerate	Lipids	PC	28319-77-9	A	1184800	1029900	845430	2280600	2980500	2852000	1156900	1028400	920320	C00670	ko00564,ko00565
mws1090	259.02	97	260.03	C6H13O9P	[M-H]-	Glucose-1-phosphate	Others	Saccharides and Alcohols	59-56-3	A	369060	678950	9	671410	804730	774650	317670	276470	344420	--	--
Hmsn000210	133.01	115.01	266.224	C17H30O2	[M-H]-	Methyl 7,10-hexadecadienoate	Lipids	Free fatty acids	-	B	8388900	7976900	8653300	39602000	38836000	38712000	31880000	32055000	33438000	--	--
pme0230	268.1	136.06	267.097	C10H13N5O4	[M+H]+	Adenosine	Nucleotides and derivatives	Nucleotides and derivatives	58-61-7	A	7631600	7453000	8148700	7801900	7638700	7769500	25168000	27004000	26042000	C00212	ko00230,ko01100,ko02010
pme2890	269.06	136	268.055	C8H16N2O4S2	[M+H]+	L-Homocystine	Amino acids and derivatives	Amino acids and derivatives	626-72-2	B	4506.8	7036.1	6661.6	7889.8	7792	7443.3	16213	17617	16144	C01817	ko00270
mws1060	267.07	135	268.081	C10H12N4O5	[M-H]-	9-(β-D-Arabinofuranosyl)hypoxanthine	Nucleotides and derivatives	Nucleotides and derivatives	7013-16-3	B	18523	17477	14238	38587	34773	37771	150350	184300	166700	--	--
mws0383	267.23	267.23	268.24	C17H32O2	[M-H]-	Cis-10-Heptadecenoic Acid	Lipids	Free fatty acids	29743-97-3	A	545620	464590	383480	394920	350750	373900	750090	557140	617530	--	--
pme2960	273.08	153	272.068	C15H12O5	[M+H]+	Naringenin chalcone	Flavonoids	Chalcones	73692-50-9	A	849350	808370	831200	32007	30670	38367	27734	22209	23930	C06561	ko00941,ko01100,ko01110
pme3285	275.09	139	274.084	C15H14O5	[M+H]+	Afzelechin(3,5,7,4'-Tetrahydroxyflavan)	Flavonoids	Flavanols	2545-00-8	A	3470000	3461500	2982700	2972500	2666500	2163200	1404700	1455000	1465700	C09320	ko00941,ko01110
pmb0034	277.1	114.7	276.096	C10H16N2O7	[M+H]+	Glu-Glu	Amino acids and derivatives	Amino acids and derivatives	3929-61-1	B	9	9	9	24087	27614	28205	127530	130510	123910	C01425	--
mws5035	279.17	120.08	278.163	C15H22N2O3	[M+H]+	Leucylphenylalanine	Amino acids and derivatives	Amino acids and derivatives	56217-82-4	B	11071	13269	14473	40169	38989	37396	32481	34548	33292	--	--
pmb1650	279.2	149.4	278.2	C18H30O2	[M+H]+	Octadeca-11E,13E,15Z-trienoic acid	Lipids	Glycerol ester	25575-00-2	A	11137000	9362600	11772000	13317000	12378000	11909000	11948000	10394000	11423000	--	--
mws0367	277.22	277.22	278.225	C18H30O2	[M-H]-	α-Linolenic Acid	Lipids	Free fatty acids	463-40-1	B	4645800	4603600	4784500	2891900	2969000	3131500	5025200	4781000	4671900	C06427	ko00592,ko01040,ko01100,ko01110
pmb0889	279.23	95.1	278.225	C18H30O2	[M+H]+	Punicic acid	Lipids	Free fatty acids	544-72-9	B	252240	248150	279590	100900	77048	81051	154180	139120	163010	C08364	--
mws0629	281.11	166	280.106	C13H16N2O5	[M+H]+	Asp-phe	Amino acids and derivatives	Amino acids and derivatives	13433-09-5	B	204470	199430	200310	316780	292880	285660	411770	426180	420370	--	--
mws1491	279.23	279.23	280.24	C18H32O2	[M-H]-	Linoleic acid	Lipids	Free fatty acids	-	B	17859000	15717000	16861000	11463000	14139000	15239000	18492000	18882000	17637000	--	--
YC512118	282.28	247.24	281.272	C18H35NO	[M+H]+	Octadecenoic amide	Others	Others	-	A	53633	33091	49230	59646	35864	40824	192110	47366	95381	--	--
mws2623	281.25	281.25	282.256	C18H34O2	[M-H]-	11-Octadecanoic acid(Vaccenic acid)	Lipids	Free fatty acids	506-17-2	A	1700500	1726900	1771800	2512000	2976500	3227500	6822600	5217900	5754300	--	--
mws0396	281.25	281.25	282.256	C18H34O2	[M-H]-	Elaidic Acid	Lipids	Free fatty acids	112-79-8	A	5353300	5302900	4615500	6783700	8885000	10328000	20401000	16271000	17908000	--	--
pme1178	284.1	152	283.092	C10H13N5O5	[M+H]+	Guanosine	Nucleotides and derivatives	Nucleotides and derivatives	118-00-3	A	3707900	3566000	3612100	4333600	4092400	4364800	9284300	8736200	8717000	C00387	ko00230,ko01100,ko02010
mws0668	283.07	151	284.076	C10H12N4O6	[M-H]-	Xanthosine	Nucleotides and derivatives	Nucleotides and derivatives	146-80-5	A	98707	94546	94003	398690	421160	383420	1356500	1298200	1401200	C01762	ko00230,ko00232,ko01100,ko01110,ko02010
mws0062	287.06	241	286.048	C15H10O6	[M+H]+	Isoluteolin (Orobol)(5,7,3',4'-tetrahydroxyisoflavone)	Flavonoids	Isoflavones	480-23-9	A	22661	18806	21433	15075	15175	19481	3630.8	3365.4	4618.3	C10510	--
mws1521	285.1	121.03	286.105	C13H18O7	[M-H]-	Salicin	Phenolic acids	Phenolic acids	138-52-3	B	113110	114430	154310	230870	240530	253130	235210	214060	172520	C01451	ko00010
mws1436	287.29	97.2	286.287	C18H38O2	[M+H]+	1,18-Octadecanediol	Lipids	Free fatty acids	3155-43-9	B	9831.9	9139.9	9387.3	9	9	9	9	9	9	--	--
pmn001686	287.22	241.22	288.23	C16H32O4	[M-H]-	10,16-Dihydroxy-palmitic acid	Lipids	Free fatty acids	3233-90-7	B	9744.5	8465.6	11108	3950.9	3689.6	3461.6	4012.7	4355.2	3894.6	--	--
pmb3081	289	97	290.004	C6H11PO11	[M-H]-	Glucarate O-Phosphoric acid	Others	Saccharides and Alcohols	-	B	7119800	10692000	7756000	3898900	4665400	4087400	719950	684630	1054600	--	--
mws0054	289.07	245	290.079	C15H14O6	[M-H]-	Catechin	Flavonoids	Flavanols	154-23-4	A	3289900	3284600	3280100	3132200	3009800	2280000	2309000	2740300	2153800	C06562	ko00941,ko01110
pme0460	291.09	139.04	290.079	C15H14O6	[M+H]+	Epicatechin	Flavonoids	Flavanols	490-46-0	A	17437000	17549000	18880000	12358000	11545000	12760000	10305000	10628000	9914600	C09727	ko00941,ko01100,ko01110
pmb2657	289.1	97.1	290.123	C10H18N4O6	[M-H]-	Argininosuccinic acid	Organic acids	Organic acids	2387-71-5	B	66381	84245	80660	82155	73120	60189	75875	75351	56268	C03406	ko00220,ko00250,ko01100,ko01110,ko01230
pmb0885	291	190.9	290.188	C18H26O3	[M+H]+	4-oxo-9Z,11Z,13E,15E-octadecatetraenoic acid	Lipids	Glycerol ester	-	B	10523	11759	11514	2894.8	3466.3	3119	3210.5	2022.5	2677.6	--	--
pma3606	295.2	179.2	294.219	C18H30O3	[M+H]+	9-Hydroxy-10,12,15-octadecatrienoic acid	Lipids	Glycerol ester	-	A	440900	417750	495080	215930	181880	176540	392590	403680	376870	--	--
pmb2792	293.21	193.1	294.219	C18H30O3	[M-H]-	13-HOTrE(r)	Lipids	Free fatty acids	74784-20-6	B	103910	111030	112940	115880	110270	112000	129680	109630	115280	--	--
pmb2786	293.21	275	294.219	C18H30O3	[M-H]-	9-HOTrE	Lipids	Free fatty acids	89886-42-0	B	30811	32622	33364	14627	15672	12528	23470	24585	21467	--	--
Lmhn202452	295.05	163.04	296.053	C13H12O8	[M-H]-	cis-p-Coumaroyltartaric acid (cis-Coutaric acid)	Phenolic acids	Phenolic acids	-	B	51142	31928	34679	9566	9553	13743	15852	17073	18442	--	--
pmb2799	295.23	195.2	296.235	C18H32O3	[M-H]-	12,13-EODE	Lipids	Free fatty acids	6799-85-5	B	2800.7	2673.2	2477.7	1268	1132.8	1328.2	2788.3	3114.1	3133.3	--	--
pmn001688	295.23	195.14	296.235	C18H32O3	[M-H]-	9S-Hyroxy-10E,12E-octadecadienoic acid	Lipids	Free fatty acids	-	B	113050	104770	126870	50397	40071	34391	54838	53074	57933	--	--
pmb2778	295.23	277.3	296.235	C18H32O3	[M-H]-	9,10-EODE	Lipids	Free fatty acids	65167-83-1	B	280240	271060	303370	92669	86686	77372	115310	123340	128780	--	--
pme1474	298.1	136	297.09	C11H15N5O3S	[M+H]+	5'-Deoxy-5'-(methylthio)adenosine	Nucleotides and derivatives	Nucleotides and derivatives	2457-80-9	B	2472500	3087800	3253000	2625600	2388100	2579100	7790100	7468700	8749300	C00170	ko00270,ko00908,ko01100
pmb0197	298.1	166.3	297.107	C11H15N5O5	[M+H]+	N2-methylguanosine	Nucleotides and derivatives	Nucleotides and derivatives	2140-77-4	B	18909	13089	15772	46632	56039	52083	115100	106180	102470	--	--
Zmhn001926	299.08	137.02	300.084	C13H16O8	[M-H]-	Salicylic acid O-glycoside	Phenolic acids	Phenolic acids	-	A	611240	602910	674590	823560	832870	763930	4924700	4596700	4312400	--	--
pme2246	301	185	302.006	C14H6O8	[M-H]-	Ellagic acid	Tannins	Tannin	476-66-4	A	21670000	23222000	22483000	11126000	11796000	11133000	4745700	4120400	4498900	C10788	--
Hmyp002315	303.04	257.04	302.042	C15H10O7	[M+H]+	3,5,7,4'--Tetrahydroxy-Coumaronochromone	Others	Others	-	A	342920	308820	310330	282120	356980	292990	259590	266680	274510	--	--
mws0044	303.05	125.02	304.058	C15H12O7	[M-H]-	Dihydroquercetin(Taxifolin)	Flavonoids	Dihydroflavonol	480-18-2	A	9622300	9550100	9702300	228250	227550	245050	228440	255760	214040	C01617	ko00941,ko01100,ko01110
mws0042	305.07	125	306.074	C15H14O7	[M-H]-	Epigallocatechin	Flavonoids	Flavanols	970-74-1	A	11960000	12142000	12293000	12177000	12462000	12937000	11366000	12161000	12371000	C12136	ko00941,ko01110
mws0049	307.08	139	306.074	C15H14O7	[M+H]+	Gallocatechin	Flavonoids	Flavanols	970-73-0	A	1292400	1169800	1284900	1547000	1365900	1423600	1010900	1070100	1069000	C12127	ko00941,ko01110
pmb2855	307	145	308.122	C11H20N2O8	[M-H]-	L-Glutamine O-hexside	Amino acids and derivatives	Amino acids and derivatives	-	B	2454.2	2428	1787.6	4791.2	5771	6835.3	13168	12233	14605	--	--
pmn001610	307.26	307.3	308.272	C20H36O2	[M-H]-	Eicosadienoic acid	Lipids	Free fatty acids	5598-38-9	B	79094	46097	55663	25859	38252	39952	29574	47172	43952	C16525	ko01040
pmb2791	309.1	209.1	310.1	C18H30O4	[M-H]-	9-HpOTrE	Lipids	Glycerol ester	111004-08-1	B	7821.2	5640.4	8849.7	9161.8	5624.2	5821.1	6498.5	6444.6	7710.3	--	--
pmn001606	309.28	309.3	310.287	C20H38O2	[M-H]-	Eicosenoic acid	Lipids	Free fatty acids	26764-41-0	B	720370	154820	166980	129200	598430	512740	432620	912260	924750	C16526	ko01040
pme3967	312.13	180	311.123	C12H17N5O5	[M+H]+	2-(Dimethylamino)guanosine	Nucleotides and derivatives	Nucleotides and derivatives	2140-67-2	A	239340	251800	255350	200970	201670	188570	745980	719440	791390	--	--
pmb2804	311.1	171.3	312.1	C18H32O4	[M-H]-	13-HPODE	Lipids	Glycerol ester	33964-75-9	B	49753	44484	52922	12199	10860	9656	9080.9	7124.2	7923.8	C04717	ko00591,ko01100
mws0636	313.15	166	312.147	C18H20N2O3	[M+H]+	Phe-Phe	Amino acids and derivatives	Amino acids and derivatives	2577-40-4	B	2438.8	3368.6	2443.4	2861.6	2216.7	2965.6	8536.1	10462	7712.4	--	--
pmn001689	311.22	223.17	312.23	C18H32O4	[M-H]-	9-Hydroxy-12-oxo-10-octadecenoic acid	Lipids	Free fatty acids	-	B	6053.5	5400.8	6651.7	1892.3	1321.4	1959.4	11839	10072	12239	--	--
pmn001367	315.07	153.02	316.079	C13H16O9	[M-H]-	Protocatechuic acid-4-glucoside	Phenolic acids	Phenolic acids	-	A	1306600	1263700	1373800	1705800	1635700	1659700	4473300	4699500	4818600	--	--
Lmfp001509	317.09	153.02	316.079	C13H16O9	[M+H]+	1-O-galloyl-α-L-rhamnose	Tannins	Tannin	-	B	23507	21812	21215	4848.8	3998.8	9	9	9	4368.5	--	--
pmb2871	315.07	153	316.079	C13H16O9	[M-H]-	2,5-Dihydroxy benzoic acid O-hexside	Phenolic acids	Phenolic acids	-	A	1181800	1262100	1271800	1569400	1561200	1412100	4309000	4311300	4265500	--	--
Hmtn001120	315.11	153.06	316.116	C14H20O8	[M-H]-	5-(2-Hydroxyethyl)-2-O-glucosylohenol	Phenolic acids	Phenolic acids	-	A	75133	71941	81933	410290	378150	412680	1410800	1342000	1340600	--	--
mws0582	322.11	130	321.099	C11H19N3O6S	[M+H]+	S-(methyl)glutathione	Amino acids and derivatives	Amino acids and derivatives	2922-56-7	B	10906	15580	13488	36430	55656	64891	269820	262420	243850	C11347	--
pmn001514	321	125	322.021	C14H10O9	[M-H]-	Digallic Acid	Phenolic acids	Phenolic acids	536-08-3	B	449380	429220	560360	189540	230490	227510	249860	253250	246880	C01572	--
pmf0359	325.09	163	324.084	C15H16O8	[M+H]+	Skimmin	Lignans and Coumarins	Coumarins	93-39-0	B	116380	97224	128380	176480	176710	188740	120020	134680	99978	--	--
pmn001516	325.06	125	326.064	C14H14O9	[M-H]-	5-Galloylshikimic acid	Phenolic acids	Phenolic acids	95719-51-0	A	40725000	37985000	40726000	16459000	15950000	16095000	3742700	3466500	3456300	--	--
pmn001419	325.09	163.04	326.1	C15H18O8	[M-H]-	1-O-[(E)-p-Cumaroyl]-β-D-glucopyranose	Phenolic acids	Phenolic acids	-	A	9646300	8905200	10810000	4836300	4759800	4877500	7622300	9273500	6284400	--	--
pmn001690	327.14	165.09	328.152	C16H24O7	[M-H]-	3-Hydroxy-4-isopropylbenzylalcohol 3-glucoside	Phenolic acids	Phenolic acids	-	B	16722	17348	22015	197430	177160	197130	378790	312670	381070	--	--
pmn001691	327.22	291.2	328.225	C18H32O5	[M-H]-	9,12,13-Trihyroxy-10,15-octadecadienoic acid	Lipids	Free fatty acids	-	B	16865	14494	14685	5586.9	5405.2	5600	6361.4	9280	13947	--	--
mws0884	328.05	134.2	329.053	C10H12N5O6P	[M-H]-	Cyclic AMP	Nucleotides and derivatives	Nucleotides and derivatives	60-92-4	B	4937	4513.8	3289.8	4442.6	2925.8	4764.2	14533	16088	16027	C00575	ko00230,ko01100
Lmtn002565	329.11	167.03	330.095	C14H18O9	[M-H]-	1'-O-vanilloyl-β-D-glucoside	Phenolic acids	Phenolic acids	-	A	1148200	1382600	1560200	1217700	1090200	1047600	692890	794090	744930	--	--
pmn001517	329.12	167	330.131	C15H22O8	[M-H]-	3,4,5-Trimethoxyphenyl-β-D-Glucopyranoside	Phenolic acids	Phenolic acids	-	B	1546100	1450400	1638600	2237100	2077600	1969300	1537500	1498100	1442500	--	--
pmp001045	331.14	151.11	330.131	C15H22O8	[M+H]+	Bartsioside	Others	Others	62133-72-6	B	428890	412950	559600	255690	219710	232410	210220	203320	226690	--	--
pmn001694	329.23	229.15	330.241	C18H34O5	[M-H]-	9,10,13-Trihyroxy-11-octadecadienoic acid	Lipids	Free fatty acids	-	B	226390	209390	225670	70440	61428	73303	89440	87548	88576	--	--
pmp001284	331.28	313.27	330.277	C19H38O4	[M+H]+	Monopalmitin	Lipids	Glycerol ester	542-44-9	B	13035	19694	18288	15166	17640	12266	15111	11047	15034	--	--
pme3184	332.08	136	331.068	C10H14N5O6P	[M+H]+	2'-Deoxyadenosine-5'-monophosphate	Nucleotides and derivatives	Nucleotides and derivatives	653-63-4	B	169180	97862	111300	98859	105240	109250	120550	117340	95958	C00360	ko00230,ko01100
pmb0789	332.13	152.07	331.127	C14H21NO8	[M+H]+	Pyridoxine-5'-O-glucoside	Others	Vitamin	-	A	283950	231260	255220	233380	251540	251070	312870	260770	261800	C03996	--
pmc0066	333.05	137.05	332.052	C10H13N4O7P	[M+H]+	2'-Deoxyinosine-5'-monophosphate	Nucleotides and derivatives	Nucleotides and derivatives	3393-18-8	B	529390	1075700	386160	1009800	1134300	1043000	913470	912590	862550	C06196	ko00230
Lmfn000604	331.07	169.01	332.074	C13H16O10	[M-H]-	6-O-Galloyl-β-D-glucose	Tannins	Tannin	13186-19-1	B	23619000	20350000	19990000	26484000	30404000	29611000	19093000	16370000	15980000	--	--
pmp000260	333.08	153.02	332.074	C13H16O10	[M+H]+	6-O-Galloyl-β-D-glucopyranoside	Phenolic acids	Phenolic acids	-	B	484590	376510	394540	117240	70914	141870	75449	62311	67490	--	--
pmn001518	331.07	169.01	332.074	C13H16O10	[M-H]-	1-O-Galloyl-β-D-glucose	Phenolic acids	Phenolic acids	58511-73-2	A	25012000	24919000	26955000	18170000	18358000	20221000	12607000	11803000	12960000	--	--
pmb2928	331	313.1	332.074	C13H16O10	[M-H]-	Gallic acid 4-O-glucoside	Tannins	Tannin	84274-52-2	A	1202300	1224800	1362300	769940	805520	820880	1002400	945150	1057400	--	--
HJN065	331.07	169.01	332.075	C13H16O10	[M-H]-	Galloyl glucose	Tannins	Tannin	-	B	18130000	18541000	19517000	16593000	16391000	16826000	11710000	11711000	10933000	--	--
HmLn000659	331.07	169.01	332.075	C13H16O10	[M-H]-	3-O-Galloyl-β-D-glucose	Tannins	Tannin	-	A	23608000	21192000	21203000	28284000	32488000	29088000	17421000	16605000	16535000	--	--
mws0675	335.06	123	334.057	C11H15N2O8P	[M+H]+	β-Nicotinamide mononucleotide	Nucleotides and derivatives	Nucleotides and derivatives	1094-61-7	B	66244	56870	48450	134320	123820	133120	86775	77696	80839	C00455	ko00760,ko01100
pmn001519	335.04	124	336.048	C15H12O9	[M-H]-	Galloyl Methyl gallate	Tannins	Tannin	-	B	6101800	5265400	5853100	324400	399610	392940	101890	91637	115540	--	--
pmb0382	339.09	177.2	338.079	C19H14O6	[M+H]+	O-Feruloyl 4-hydroxylcoumarin	Lignans and Coumarins	Coumarins	-	A	14209	21568	23212	74495	48685	62532	161750	185020	218580	--	--
pmb3074	337.09	191.1	338.1	C16H18O8	[M-H]-	3-O-p-Coumaroyl quinic acid	Phenolic acids	Phenolic acids	1899-30-5	A	420500	470330	529310	254630	222070	271700	246920	246150	287600	C12208	ko00940,ko00941,ko00945,ko01110
pmp000232	339.11	147.04	338.1	C16H18O8	[M+H]+	Cis-3-p-coumaric quinic acid	Phenolic acids	Phenolic acids	-	A	677430	798850	984010	1021600	814000	981250	1534900	1591600	1726900	--	--
mws5039	341.09	179.04	340.079	C15H16O9	[M+H]+	Esculin Hydrate	Lignans and Coumarins	Coumarins	66778-17-4	B	94305	109000	100590	188230	140000	152550	119110	119370	113370	--	--
pma0149	341.08	207.07	340.079	C15H16O9	[M+H]+	Sinapoyl malate	Phenolic acids	Phenolic acids	92344-58-6	B	8050.4	8216.9	10754	11776	7655.2	8182.1	12439	10421	13655	C02887	ko00940
pmn001420	341.09	179.04	342.095	C15H18O9	[M-H]-	1-O-[(E)-Caffeoyl]-β-D-glucopyranose	Phenolic acids	Phenolic acids	-	B	181100	183850	183550	590810	506150	444160	2346800	2849700	3185900	--	--
mws0264	341.11	119	342.116	C12H22O11	[M-H]-	D-(+)-TrehaloseAnhydrous	Others	Saccharides and Alcohols	99-20-7	A	509040	549380	717410	898070	988990	945900	1560400	1455600	1349500	C01083	ko00500,ko01100,ko01110,ko02010
mws5038	341.11	89.02	342.116	C12H22O11	[M-H]-	Isomaltulose	Others	Saccharides and Alcohols	13718-94-0	A	584340	717030	812400	1162700	1341600	1189500	1562100	1986500	1652200	--	--
pmb2211	343.3	240.7	342.288	C19H38N2O3	[M+H]+	Cocamidopropyl betaine	Alkaloids	Alkaloids	4292-10-8	A	15508	14496	17901	19590	17512	11744	60354	42377	48294	--	--
mws0609	344.04	150	345.047	C10H12N5O7P	[M-H]-	Guanosine 3',5'-cyclic monophosphate	Nucleotides and derivatives	Nucleotides and derivatives	7665-99-8	B	7946	11680	12681	8063.5	9788.4	8667.7	16152	18861	15298	C00942	ko00230,ko01100
pmp000261	347.1	153.02	346.09	C14H18O10	[M+H]+	Methyl 6-O-galloyl-β-D-glucopyranoside	Phenolic acids	Phenolic acids	-	B	349690	312170	311780	8187.3	9469.4	7897.7	10584	9285.5	10526	--	--
pmb0981	348.07	136	347.063	C10H14N5O7P	[M+H]+	Adenosine 5'-monophosphate	Nucleotides and derivatives	Nucleotides and derivatives	61-19-8	B	634490	473390	557790	327270	383250	412180	1100100	1050100	1012400	C00020	ko00230,ko00908,ko01100,ko01110
pmb1562	351.25	146.9	350.246	C21H34O4	[M+H]+	MAG(18:4)isomer3	Lipids	Glycerol ester	-	B	9566	10175	8273.5	7255.2	5568.3	6329.7	8845.4	9406.1	10580	--	--
pmb0149	351.25	147.1	350.246	C21H34O4	[M+H]+	MAG(18:4)isomer1	Lipids	Glycerol ester	-	B	33503	23073	29929	5331.3	5732.3	8608.1	9	9	9	--	--
Lmhp011388	353.27	261.22	352.261	C21H36O4	[M+H]+	2-γ-Linolenoyl-glycerol	Lipids	Glycerol ester	-	B	739850	598240	636430	738490	792800	754120	680270	744580	748490	--	--
Lmhp011562	353.27	261.22	352.261	C21H36O4	[M+H]+	1-α-Linolenoyl-glycerol	Lipids	Glycerol ester	-	B	625020	601590	595280	372480	378240	361870	304960	323730	298770	--	--
mws1077	355.1	193.05	354.095	C16H18O9	[M+H]+	Scopolin	Lignans and Coumarins	Coumarins	531-44-2	A	79086	79266	86250	873080	832040	912700	444970	484570	421750	C01527	ko00940,ko01110
mws0178	353.09	191.01	354.095	C16H18O9	[M-H]-	Chlorogenic acid	Phenolic acids	Phenolic acids	327-97-9	A	176090	176590	170390	168020	160830	145470	406270	449630	453370	C00852	ko00940,ko00941,ko00945,ko01110
pme1816	353.09	191	354.095	C16H18O9	[M-H]-	Neochlorogenic acid(5-O-Caffeoylquinic acid)	Phenolic acids	Phenolic acids	906-33-2	A	206860	213690	229550	190620	232220	193220	495260	493840	565330	C17147	--
Lmhp112042	355.28	263.24	354.277	C21H38O4	[M+H]+	1-Linoleoylglycerol	Lipids	Glycerol ester	2277-28-3	A	198430	175810	196040	78905	75471	69584	38012	40832	44503	--	--
pmb0164	355.28	147.2	354.277	C21H38O4	[M+H]+	MAG(18:2)isomer1	Lipids	Glycerol ester	-	B	41831	43928	44624	7854.9	7803.6	8416.9	9	9	9	--	--
pmb0296	357.3	265.4	356.293	C21H40O4	[M+H]+	MAG(18:1)isomer2	Lipids	Glycerol ester	-	B	49950	40340	42326	27186	30278	25540	51651	72475	53291	--	--
pme0085	359.08	196.7	360.084	C18H16O8	[M-H]-	Rosmarinic acid	Phenolic acids	Phenolic acids	537-15-5	B	17470	19721	22799	63209	57311	65640	136940	139890	147190	C01850	ko00350,ko01100
pmb3107	359.1	182.1	360.106	C15H20O10	[M-H]-	Glucosyringic Acid	Phenolic acids	Phenolic acids	-	A	30583	38261	43198	117010	90882	105800	143220	136040	127120	--	--
pmb0998	364.07	152.1	363.058	C10H14N5O8P	[M+H]+	Guanosine 5'-monophosphate	Nucleotides and derivatives	Nucleotides and derivatives	85-32-5	A	18415	13439	19881	17881	11352	17634	44948	37486	44157	C00144	ko00230,ko01100
pma3724	369.1	177.1	368.111	C17H20O9	[M+H]+	1-O-Feruloyl quinic acid	Phenolic acids	Phenolic acids	-	A	84932	63565	79598	18745	19838	18990	11082	16606	13750	--	--
pmn001695	371.1	249.06	372.106	C16H20O10	[M-H]-	Trihydroxycinnamoylquinic acid	Phenolic acids	Phenolic acids	-	A	216500	212770	200370	193330	163610	164380	328360	284960	334840	--	--
mws0055	373.13	343	372.121	C20H20O7	[M+H]+	Tangeretin	Flavonoids	Flavonols	481-53-8	B	388220	21199	20566	23973	20251	21408	22143	18220	20825	C10190	--
pmb0108	375.2	137.1	374.1	C19H18O8	[M+H]+	Feruloyl syringic acid	Phenolic acids	Phenolic acids	-	B	1335500	1373700	1192400	1298900	1164600	1251100	887550	884050	932910	--	--
mws0232	377.15	243	376.138	C17H20N4O6	[M+H]+	Riboflavin	Others	Vitamin	83-88-5	B	26396	26411	29103	27492	22056	25639	75026	75115	73671	C00255	ko00740,ko01100,ko01110,ko02010
pmc0304	384.12	252	383.108	C14H17N5O8	[M+H]+	Succinyladenosine	Nucleotides and derivatives	Nucleotides and derivatives	4542-23-8	A	864660	798820	915280	1435100	1407300	1284900	1668700	1723700	1610200	--	--
pme1286	385.13	250	384.122	C14H20N6O5S	[M+H]+	S-(5'-Adenosy)-L-homocysteine	Amino acids and derivatives	Amino acids and derivatives	979-92-0	B	8430.5	17074	19173	28955	32975	28489	122210	95174	96451	C00021	ko00270,ko01100,ko01230
pmb2940	385.11	205	386.121	C17H22O10	[M-H]-	1-O-β-D-Glucopyranosyl sinapate	Phenolic acids	Phenolic acids	78185-48-5	B	26648	34322	39708	328540	303240	338130	1580700	1902800	1707800	--	--
Lmzn001582	387.17	207.1	388.174	C18H28O9	[M-H]-	5'-Glucopyranosyloxyjasmanic acid	Phenolic acids	Phenolic acids	-	B	197920	167480	193690	88786	78426	78941	169250	179910	175350	--	--
Hmpp002596	391.17	137.05	390.168	C21H26O7	[M+H]+	5'-Hydroxyhexahydrocurcumin	Others	Others	-	B	248730	268660	280410	289920	294020	315920	160210	167250	174270	--	--
pme3007	402.99	159	404.002	C9H14N2O12P2	[M-H]-	Uridine 5'-diphosphate	Nucleotides and derivatives	Nucleotides and derivatives	27821-45-0	B	10929	12143	9070.2	18694	20327	20355	29692	28141	30542	C00015	ko00240,ko00908,ko01100
pmn001738	403.12	223.1	404.132	C17H24O11	[M-H]-	Oleoside 11-methyl ester	Phenolic acids	Phenolic acids	60539-23-3	B	9	9	9	38586	38545	29999	111030	97011	94002	--	--
Lmhn001773	416.06	179.03	415.054	C19H13NO10	[M-H]-	Caffeoylnicotinoyltartaric acid	Phenolic acids	Phenolic acids	-	B	9	9	9	9	9	1749.3	6642.5	2404.9	6595.2	--	--
pmp001014	421.11	259.1	420.106	C20H20O10	[M+H]+	1-Glycosyloxy-2-hydroxy-4-methoxy-xanthone	Others	Xanthone	-	B	9	9	9	9	9	9	829430	650500	600210	--	--
Lmhp008337	426.26	285.24	425.254	C19H40NO7P	[M+H]+	LysoPE 14:0(2n isomer)	Lipids	LPE	-	B	9	9	9	2515.7	2544.7	2616	16772	17051	17530	--	--
pmb0864	426.26	285.24	425.254	C19H40NO7P	[M+H]+	LysoPE 14:0	Lipids	LPE	-	B	4551.2	5415.1	5400	55368	54823	58999	75974	86059	106080	--	--
mad1424	427.05	295.05	426.043	C17H14O13	[M+H]+	Ditartaroyl-hydroxylcoumarin	Phenolic acids	Phenolic acids	-	B	141180	128980	115320	207020	230860	201350	525390	539350	632270	--	--
pme2117	426	159	427.029	C10H15N5O10P2	[M-H]-	Adenosine 5'-Diphosphate	Nucleotides and derivatives	Nucleotides and derivatives	58-64-0	B	41284	46190	48048	67183	97862	87920	149980	159360	179100	C00008	ko00190,ko00195,ko00230,ko00908,ko01100,ko01110
Lmhn002574	431.06	137.03	432.069	C20H16O11	[M-H]-	Caffeoylp-Hydroxybenzoyltartaric acid	Phenolic acids	Phenolic acids	-	A	8683	11263	5940.5	8909	4736.8	10935	28431	28450	27574	--	--
Hmln002878	433.04	301	434.048	C19H14O12	[M-H]-	Ellagic acid pentoside	Tannins	Tannin	-	A	3973100	4839000	4781800	4612900	4230200	4972500	4893200	5323900	4548900	--	--
Lmdp003509	435.09	303.06	434.084	C20H18O11	[M+H]+	Quercetin 3-O-β-D-xylopyranoside	Flavonoids	Flavonols	549-32-6	B	2402700	2752800	3197100	3186700	2290000	2974600	1985300	2379100	2207500	--	--
mws4183	433.08	300.03	434.085	C20H18O11	[M-H]-	Quercetin-3-O-α-L-arabinopyranoside(guaijaverin)	Flavonoids	Flavonols	22255-13-6	A	611610	671850	750880	934660	711550	880370	562420	709560	844900	--	--
mws1179	433.11	271	434.121	C21H22O10	[M-H]-	Naringenin-7-O-glucoside	Flavonoids	Dihydroflavone	529-55-5	A	1741100	1678800	1957300	1873500	1866500	2138000	1088300	1111500	1087900	--	--
mws2118	435.13	166.7	436.137	C21H24O10	[M-H]-	Phlorizin	Flavonoids	Chalcones	60-81-1	A	2269500	2422700	2494600	2144400	2155900	2117100	1511700	1629200	1626000	C01604	ko00941,ko01110
Lmhp008885	440.28	299.26	439.27	C20H42NO7P	[M+H]+	LysoPE 15:0(2n isomer)	Lipids	LPE	-	B	9	9	9	9	9	9	8634.2	15817	13744	--	--
pmb0862	440.28	184.07	439.27	C20H42NO7P	[M+H]+	LysoPC 12:0	Lipids	LPC	20559-18-6	B	2748.4	2283.5	2517.7	35445	34976	33983	114300	122120	118920	--	--
Lmhp009187	440.28	299.26	439.27	C20H42NO7P	[M+H]+	LysoPE 15:0	Lipids	LPE	-	B	47518	48794	50166	43455	45456	46741	72488	69994	59487	--	--
Lmhn003543	441.08	203.04	442.09	C22H18O10	[M-H]-	di-p-Coumaroyltartaric acid	Phenolic acids	Phenolic acids	-	A	1425100	2113300	1459200	358950	256900	306340	101690	115050	163930	--	--
pme0458	441.3	289	442.09	C22H18O10	[M-H]-	Catechin gallate	Phenolic acids	Phenolic acids	130405-40-2	A	562100	620740	713820	260170	264050	276150	122900	85632	103730	--	--
mws1397	441.08	169	442.09	C22H18O10	[M-H]-	Epicatechin gallate	Flavonoids	Flavanols	1257-08-5	A	3839700	3882000	4251000	5519600	4941600	5632300	2651400	2844700	2937200	--	--
pmp000091	445.15	177.05	444.142	C23H24O9	[M+H]+	Glyceryl 1,3-diferulate	Phenolic acids	Phenolic acids	83008-46-2	B	60420	47296	57672	113150	108700	110820	78731	83960	83946	--	--
pme1014	445.3	341.3	444.303	C31H40O2	[M+H]+	Menaquinone (K2)	Others	Vitamin	11032-49-8	A	208770	99077	114140	91271	116710	120060	118480	136460	128220	C00828	ko00130,ko01100,ko01110
Hmln003405	447.06	315.01	446.049	C20H16O12	[M-H]-	4-α-L-Rhamnopyranosyl-ellagic acid	Tannins	Tannin	-	B	9	9	9	9	9	9	9	9	9	--	--
pmp000573	447.13	285.08	446.121	C22H22O10	[M+H]+	Acacetin-7-O-galactoside	Flavonoids	Flavonoid	-	B	9	9	9	7236.5	5340.6	6048.9	82256	61870	65911	--	--
pmp000575	447.13	285.18	446.121	C22H22O10	[M+H]+	Tilianin(Acacetin-7-O-β-D-glucoside)	Flavonoids	Flavonoid	4291-60-5	B	9	9	9	8067.6	2477.5	2435.8	78174	60213	53545	--	--
pme3400	447.13	285	446.121	C22H22O10	[M+H]+	Sissotrin	Flavonoids	Isoflavones	5928-26-7	B	9	9	9	6277.9	4041.3	3010.6	61386	54552	48014	C05376	ko00943
Lmlp001118	448.2	286.15	447.189	C23H29NO8	[M+H]+	3'-Glucosyl-6,7-dihydroxy-N-methyl-benzyltetrahydroisoquinoline	Alkaloids	Alkaloids	-	B	9	9	9	496160	498540	529200	1970800	1995600	2050600	--	--
pmb1283	448.1	163.5	447.215	C18H33N5O6S	[M+H]+	L-Glutaminyl-L-valyl-L-valyl-L-cysteine	Amino acids and derivatives	Amino acids and derivatives	-	B	394280	396520	380730	457600	455430	468770	252760	243400	256660	--	--
Lmhp007836	448.25	307.23	447.239	C21H38NO7P	[M+H]+	LysoPE 16:3	Lipids	LPE	-	B	433.81	442.16	741.67	2604.5	3113.5	3774.5	3971.4	3907.5	4061.4	--	--
pme2459	449.11	287.2	448.101	C21H20O11	[M+H]+	Luteolin-7-O-glucoside(Cynaroside)	Flavonoids	Flavonoid	5373-11-5	A	5890000	4894300	6292400	3669900	4156900	3924000	1276300	1426800	1208000	C03951	ko00944
mws0045	449.11	303.05	448.101	C21H20O11	[M+H]+	Quercetin-3-O-α-L-rhamnoside(Quercitrin )	Flavonoids	Flavonols	522-12-3	B	145660	179860	211150	191890	154320	208750	128100	150700	146930	C01750	ko00944
mws0913	447.09	285	448.101	C21H20O11	[M-H]-	Kaempferol-3-O-galactoside (Trifolin)	Flavonoids	Flavonols	23627-87-4	A	106890	127630	163520	300220	248680	308650	141360	164340	190590	C12626	ko00944
Lmlp003531	449.11	287.06	448.101	C21H20O11	[M+H]+	Luteolin 3'-O-β-D-glucoside	Flavonoids	Flavonoid	5154-41-6	A	2276500	2361200	2183200	1874300	1705400	1981700	987240	969950	1080200	--	--
pmb0550	449.11	287.06	449.108	C21H21O11+	[M]+	Cyanidin-3-O-glucoside (Kuromanin)	Flavonoids	Anthocyanins	47705-70-4	A	1440200	1689300	2190900	822160	692040	1252200	2191300	2423000	990330	C08604	ko00942
Lmhp009034	452.28	311.26	451.27	C21H42NO7P	[M+H]+	LysoPE 16:1	Lipids	LPE	-	B	3333.1	2100	3933.5	10660	16710	14434	98735	183330	163170	--	--
Lmhp008763	452.28	311.26	451.27	C21H42NO7P	[M+H]+	LysoPE 16:1(2n isomer)	Lipids	LPE	-	B	22654	25133	20495	53373	64706	63042	313130	337170	297900	--	--
pmn001416	451.1	341.06	452.111	C24H20O9	[M-H]-	Catechin-(7,8-bc)-4α-(3,4-dihydroxyphenyl)-dihydro-2-(3H)-pyranone	Flavonoids	Flavanols	-	A	98233	128200	142550	368130	265800	305040	341550	362300	382030	--	--
pmn001415	451.1	341.06	452.111	C24H20O9	[M-H]-	Catechin-(7,8-bc)-4β-(3,4-dihydroxyphenyl)-dihydro-2-(3H)-pyranone	Flavonoids	Flavanols	-	B	100360	130110	139980	315590	262020	287920	332520	328180	341640	--	--
pmp000308	453.18	291.13	452.168	C22H28O10	[M+H]+	4'-O-β-D-Glucosyl-5-O-methylvisamminol	Others	Others	84272-85-5	B	297860	219630	296630	458720	462360	433570	348500	311010	310240	--	--
pmb0876	454.29	313.27	453.286	C21H44NO7P	[M+H]+	LysoPE 16:0	Lipids	LPE	53862-35-4	A	2584500	2619700	2687300	4530800	4309700	4562000	8467500	9310000	7502600	--	--
pmb0478	455.15	147.4	454.148	C21H26O11	[M+H]+	Coumarin O-rutinoside	Phenolic acids	Phenolic acids	-	B	2287.8	2269.2	1897.4	2961	2799.6	1888.7	2737.9	3155.7	3818.8	--	--
HJN109	455.36	455.36	456.36	C30H48O3	[M-H]-	oleanolic acid	Terpenoids	Triterpene	-	A	637090	581650	639490	457980	520930	554300	1016800	628140	663030	--	--
pmb0464	458.1	116.3	457.143	C16H27NO14	[M+H]+	Aspartic acid di-O-glucoside	Amino acids and derivatives	Amino acids and derivatives	-	B	121620	113710	129480	157440	149620	158680	1288200	1212300	1126700	--	--
pmb2654	460.1	117.9	461.153	C19H27NO12	[M-H]-	Anthranilate O-hexosyl-O-hexoside	Phenolic acids	Phenolic acids	-	B	45499	38340	51731	70574	64620	73112	327800	239000	233590	--	--
mws4167	463.09	287.06	462.08	C21H18O12	[M+H]+	Luteolin-7-O-glucuronide	Flavonoids	Flavonoid	29741-10-4	A	33735	22479	50485	24506	31152	69833	32845	34195	19277	--	--
Lmmp003767	463.09	287.05	462.08	C21H18O12	[M+H]+	Kaempferol glucuronic acid	Flavonoids	Flavonols	-	B	3768.5	2674.5	5362.3	10233	7869	7785.9	12148	11326	16039	--	--
Lmmp002795	463.12	301.07	462.115	C22H22O11	[M+H]+	Pratensein 7-O-glucopyranoside	Flavonoids	Flavonoid	36191-03-4	B	9	9	9	9	9	9	9	9	9	--	--
Hmdn001667	463.05	300.99	464.06	C20H16O13	[M-H]-	Ellagicacid-4-O-β-D-galloyl-β-Dglucopyranoside	Tannins	Tannin	-	A	1377400	1412600	1513300	1894600	1799500	1926000	1901400	2019300	2031800	--	--
mws0091	463.09	300.03	464.095	C21H20O12	[M-H]-	Quercetin-3-O-β-D-glucoside(Isoquercitrin)	Flavonoids	Flavonols	482-35-9	A	3228600	3193100	3622100	9087400	8842500	8457100	15896000	18153000	18051000	C05623	ko00944,ko01100,ko01110
Lmdp003286	465.1	303.06	464.095	C21H20O12	[M+H]+	isohyperoside	Flavonoids	Flavonols	35589-21-0	A	3091800	3129500	3110100	3973500	3791200	4064400	5083000	5477300	5844900	--	--
mws0061	463.09	300	464.095	C21H20O12	[M-H]-	Quercetin-3-O-β-D-Galactoside (Hyperin)	Flavonoids	Flavonols	482-36-0	A	4786900	5036800	5700800	17340000	14420000	16230000	29637000	29706000	30150000	C10073	--
Hmcn001884	463.09	301.03	464.095	C21H20O12	[M-H]-	6-Hydroxyluteolin 5-glucoside	Flavonoids	Flavonoid	-	A	2325600	2306700	2414700	7630300	6782400	6599800	11748000	13434000	13939000	--	--
Lmzp002365	465.14	303.09	464.131	C22H24O11	[M+H]+	Hesperetin-7-O-glucoside	Flavonoids	Flavonoid	31712-49-9	B	1720500	1690700	1912500	1229100	1218100	1436800	522200	518580	496320	C16422	ko00941
pme1598	463.12	301	464.132	C22H24O11	[M-H]-	Hesperetin 5-O-glucoside	Flavonoids	Dihydroflavonol	69651-80-5	B	2326500	2498400	2328300	6901600	6406800	7294100	11870000	14746000	13987000	--	--
pme1398	465.1	303.05	465.103	C21H21O12+	[M]+	Delphinidin-3-O-glucoside (Mirtillin)	Flavonoids	Anthocyanins	50986-17-9	B	1178700	1000500	1201900	1010900	966240	906390	605520	620590	553000	C12138	ko00942
Lmhp009769	466.29	325.27	465.286	C22H44NO7P	[M+H]+	LysoPE 17:1	Lipids	LPE	-	B	11103	7237.3	10108	19805	19831	20918	60670	46320	56845	--	--
Lmhp009464	466.29	325.27	465.286	C22H44NO7P	[M+H]+	LysoPE 17:1(2n isomer)	Lipids	LPE	-	B	39614	34122	43994	54796	60328	60278	136230	136890	126580	--	--
pmd0130	468.31	184.07	467.301	C22H46NO7P	[M+H]+	LysoPC 14:0(2n isomer)	Lipids	LPC	-	B	9133.4	8445.6	12764	14531	13225	16688	35230	39806	36743	--	--
Lmfn001344	467.08	169.01	468.09	C20H20O13	[M-H]-	Maplexin C (2,3-Di-O-Galloyl-1,5-Anhydro-D-Glucitol)	Tannins	Tannin	-	B	5222200	5610700	5588100	3340100	3348400	3551500	2343200	2350500	2374400	--	--
pmn001704	469.33	423.33	470.34	C30H46O4	[M-H]-	2,3-Dihydroxy 5(6),12(13)diene ursolic acid	Terpenoids	Triterpene	-	A	1752.3	1323.2	2032.5	2034.4	1469.7	838.93	4482.6	4202.2	4432.6	--	--
mad2400	471.09	307.05	472.101	C23H20O11	[M-H]-	p-Coumaroylferuloyltartaric acid	Phenolic acids	Phenolic acids	-	B	54340	55228	61589	38601	31637	41529	197540	200060	218240	--	--
Hmpn009573	471.35	453.33	472.354	C30H48O4	[M-H]-	Corosolic acid	Terpenoids	Triterpene	4547-24-4	A	488640	473380	475610	543770	521680	518950	669570	683540	687520	--	--
Lmzn006284	471.35	471.35	472.355	C30H48O4	[M-H]-	2α-hydroxyursolic acid	Terpenoids	Triterpene	-	A	14459000	14385000	15505000	11796000	12255000	12902000	9180100	8892700	9234500	--	--
pmn001705	471.35	471.35	472.355	C30H48O4	[M-H]-	3,24-Dihydroxy-17,21-semiacetal-12(13)oleanolic fruit	Terpenoids	Triterpene	-	B	27930000	28309000	28477000	29486000	29399000	28782000	43527000	42511000	44439000	--	--
pmp000266	473.36	207.17	472.355	C30H48O4	[M+H]+	3β,19α-Dihydroxyolean-12-en-28-oic acid	Terpenoids	Triterpene	-	B	52134	43953	47839	57673	58125	57238	158200	154610	194940	--	--
pmb1912	474.17	327	473.166	C20H23N7O7	[M+H]+	10-Formyl-THF	Alkaloids	Alkaloids	2800-34-2	A	8077100	7707800	7744600	9924200	9449700	9140400	9326300	8732500	9288400	C00234	ko00670,ko00970,ko01100,ko01200
Lmhp008233	474.26	333.24	473.254	C23H40NO7P	[M+H]+	LysoPE 18:4	Lipids	LPE	-	B	1973.1	1982.6	2700	7228	7533.9	7978.9	14930	13564	12504	--	--
Lmhp008589	476.28	335.26	475.27	C23H42NO7P	[M+H]+	LysoPE 18:3(2n isomer)	Lipids	LPE	-	B	6327400	6459600	7098900	13498000	14792000	16508000	16856000	18704000	14202000	--	--
Lmhp008801	476.28	335.26	475.27	C23H42NO7P	[M+H]+	LysoPE 18:3	Lipids	LPE	-	B	663370	648730	670550	1176000	924860	1159200	2131500	2182300	2160900	--	--
pmb0874	478.29	337.27	477.286	C23H44NO7P	[M+H]+	LysoPE 18:2(2n isomer)	Lipids	LPE	-	A	14342000	13217000	15166000	29604000	29645000	30667000	25300000	26485000	24502000	--	--
pmb0881	478.29	337.27	477.286	C23H44NO7P	[M+H]+	LysoPE 18:2	Lipids	LPE	-	B	1749300	1578400	1806300	2181000	2062300	2077100	2309700	2413800	2447700	--	--
Hmjp003123	479.08	303.06	478.075	C21H18O13	[M+H]+	Quercetin-5-O-glucuronide	Flavonoids	Flavonols	-	B	252490	131320	332490	211930	209270	607600	191580	220090	133780	--	--
Hmpp003242	479.11	317.06	478.101	C22H22O12	[M+H]+	Isorhamnetin-3-O-glucoside	Flavonoids	Flavonols	-	A	4379200	4146200	5139800	3860300	3459300	3659300	3180200	2897800	3210800	--	--
pmp000607	479.12	317.06	478.111	C22H22O12	[M+H]+	1-Demethyl orange blunt-leaf casein-2-O-B-D-glucopyranoside	Quinones	Anthraquinone	-	B	2678700	2232700	2964700	2514100	2395900	2422900	1969400	2049800	2035300	--	--
pmn001525	477.14	169	478.148	C23H26O11	[M-H]-	3,5-Di-O-galloylshikimic acid	Phenolic acids	Phenolic acids	95753-52-9	B	312510	420110	438470	254050	274350	245960	58510	79123	61498	--	--
Lmnn002886	477.14	179.03	478.148	C23H26O11	[M-H]-	1'-O-β-D-(3,4-Dihydroxyphenethyl)-O-caffeoyl-glucoside	Phenolic acids	Phenolic acids	-	B	19955	27436	37521	32263	29954	39316	33546	38178	9	--	--
pmp001280	480.31	339.29	479.301	C23H46NO7P	[M+H]+	3-{[(2-Aminoethoxy)(hydroxy)phosphoryl]oxy}-2-hydroxypropyl-9,12-octadecenoate	Alkaloids	Alkaloids	-	A	124770	111220	137400	324020	314810	331890	905660	957730	979490	--	--
pmb0856	480.31	339.29	479.301	C23H46NO7P	[M+H]+	LysoPE 18:1(2n isomer)	Lipids	LPE	-	B	505530	494800	539910	2292400	2508900	2628000	4900200	4792900	4741700	--	--
mws0289	480.31	339.29	479.301	C23H46NO7P	[M+H]+	LysoPE 18:1	Lipids	LPE	89576-29-4	A	142630	134320	127530	313150	307710	293120	858620	1016700	1028600	--	--
pmb2260	480.31	184.07	479.301	C23H46NO7P	[M+H]+	LysoPC 15:1	Lipids	LPC	-	B	12433	11497	9734.6	32132	30492	38551	75517	84961	69847	--	--
Wmhn004487	479.08	317	480.054	C20H16O14	[M-H]-	Ellagyl glucose	Tannins	Tannin	-	B	15776	14542	32558	38693	35568	45038	100680	86578	98324	--	--
pmb0883	482.32	341.31	481.317	C23H48NO7P	[M+H]+	LysoPE 18:0	Lipids	LPE	69747-55-3	B	106150	95246	97620	112220	108570	109550	263790	252210	256790	--	--
pmb0880	482.32	341.31	481.317	C23H48NO7P	[M+H]+	LysoPE 18:0(2n isomer)	Lipids	LPE	-	B	3377.3	3146.3	2555.7	14462	11815	14726	27622	25642	25261	--	--
pmb2319	482.32	184.07	481.317	C23H48NO7P	[M+H]+	LysoPC 15:0	Lipids	LPC	-	B	16658	16915	16211	7281.6	7933.6	5891.2	12427	13216	15472	--	--
Lmhp009129	482.32	184.07	481.317	C23H48NO7P	[M+H]+	LysoPC 15:0(2n isomer)	Lipids	LPC	-	B	24547	26678	28670	9766.6	7571.5	9093.5	20535	21705	22023	--	--
pmn001628	481.06	275	482.07	C20H18O14	[M-H]-	Hexahydroxydiphenoylglucose	Phenolic acids	Phenolic acids	-	A	46599000	50112000	56472000	37115000	35223000	35768000	24558000	24998000	28390000	--	--
pmb3066	481.14	319.2	482.142	C22H26O12	[M-H]-	5-O-p-Coumaroyl shikimic acid O-hexoside	Phenolic acids	Phenolic acids	-	B	20107	26052	17205	47933	42221	48885	65763	51965	66854	--	--
Wmhn001495	483.08	169.01	484.077	C20H20O14	[M-H]-	1,4-di-O-galloyl-β-D-glcose	Tannins	Tannin	-	B	3771900	3159700	4481900	3022100	2311800	2656700	1429700	1281600	1252200	--	--
pmn001526	483.08	169.01	484.085	C20H20O14	[M-H]-	1,6-Di-O-Galloyl-D-Glucose	Phenolic acids	Phenolic acids	-	A	172230	181450	201750	89213	69637	61480	23440	24656	54094	--	--
pmp000444	487.34	469.33	486.335	C30H46O5	[M+H]+	27,28-Dicarboxyl ursolic acid	Terpenoids	Triterpene	-	B	312650	395920	358590	49707	44524	31958	571720	653720	712880	--	--
pmp000268	487.34	405.31	486.335	C30H46O5	[M+H]+	Rosamultic acid	Terpenoids	Triterpene	14285-76-4	B	5015100	5089300	4856100	6221800	5608700	6052400	22849000	19270000	23883000	--	--
Lmhp007595	488.28	184.07	487.27	C24H42NO7P	[M+H]+	LysoPC 16:4	Lipids	LPC	-	B	12672	14841	13599	17217	17065	17688	25389	26392	27575	--	--
pmn001527	487.18	124	488.189	C22H32O12	[M-H]-	Di-O-galloyl Methyl gallate	Phenolic acids	Phenolic acids	-	B	28609	26389	32162	9959.5	8344	18721	22243	21359	19931	--	--
Wmhn009757	487.34	487.34	488.35	C30H48O5	[M-H]-	2α,3β,23-trihydroxy-12-ene-28-ursolic acid	Terpenoids	Triterpene	-	A	5112200	4618100	5098500	5278800	4978900	5282000	30419000	30642000	31460000	--	--
pmn001426	487.34	469.23	488.35	C30H48O5	[M-H]-	Euscaphic acid	Terpenoids	Triterpene	53155-25-2	A	30075	29659	34750	74536	73521	81262	229320	227700	225910	C17890	--
Zmpn006881	487.34	469.32	488.35	C30H48O5	[M-H]-	Tormentic acid	Terpenoids	Triterpene	13850-16-3	A	5636400	5819400	5757100	5402600	5157700	5265500	9838000	10289000	9646200	--	--
pmp000269	489.36	407.33	488.35	C30H48O5	[M+H]+	Arjunic Acid	Terpenoids	Triterpene	31298-06-3	A	3176600	2889300	3251200	2892800	2731400	3194800	5317900	5252500	5809500	--	--
Hmln002582	489.11	284.04	490.112	C23H22O12	[M-H]-	Kaempferol-3-O-(6''-acetyl)-glucoside	Flavonoids	Flavonols	-	B	48537	65531	70545	28848	23177	19196	3988.1	5104.3	5185.8	--	--
pma1303	492.31	184.07	491.301	C24H46NO7P	[M+H]+	LysoPC 16:2	Lipids	LPC	-	B	9	9	9	7284.4	8497.8	6560	19584	16498	11586	--	--
pme0444	493.13	331.08	493.135	C23H25O12+	[M]+	Malvidin-3-O-glucoside (Oenin)	Flavonoids	Anthocyanins	18470-06-9	B	6103.6	4898.9	5924.1	14957	11107	14401	26468	18103	21638	C12140	ko00942
pmb0790	494.19	332.5	493.18	C20H31NO13	[M+H]+	Pyridoxine di-O-hexoside	Others	Vitamin	-	B	17604	14403	12261	21901	23701	20565	24140	25703	21323	--	--
pmp001270	494.32	184.07	493.317	C24H48NO7P	[M+H]+	LysoPC 16:1	Lipids	LPC	-	A	9	9	9	38840	33533	60677	241740	368620	354890	--	--
pmd0132	496.34	184.07	495.332	C24H50NO7P	[M+H]+	LysoPC 16:0(2n isomer)	Lipids	LPC	-	B	447660	448220	487520	304180	318790	352200	1032700	1077600	1116200	--	--
pmb0855	496.34	184.07	495.332	C24H50NO7P	[M+H]+	LysoPC 16:0	Lipids	LPC	17364-16-8	A	8343100	8203600	8778800	11090000	10897000	11208000	24032000	23577000	23686000	--	--
Lmhp008688	500.28	359.26	499.27	C25H42NO7P	[M+H]+	LysoPE 20:5	Lipids	LPE	-	B	1176.9	1175.2	947.48	3143.4	3514.9	2691.1	4681.4	4417.4	2808.1	--	--
pmb3061	499.15	163.1	500.153	C22H28O13	[M-H]-	5-O-p-Coumaroyl quinic acid O-hexoside	Phenolic acids	Phenolic acids	-	A	13111	17817	12919	15953	12414	10878	58032	59122	48560	--	--
Lmhp009349	502.29	361.27	501.286	C25H44NO7P	[M+H]+	LysoPE 20:4(2n isomer)	Lipids	LPE	-	B	2808.8	2482.5	2512.3	4103.9	4603.4	5691.1	3744.2	2588.7	4076.1	--	--
mad2394	501.1	337.05	502.111	C24H22O12	[M-H]-	Sinapoyl-p-coumaroyltartaric acid	Phenolic acids	Phenolic acids	-	B	19996	19803	24548	37783	36908	31596	96031	106540	96735	--	--
Lmhn003799	501.1	307.05	502.111	C24H22O12	[M-H]-	Feruloylferuloyltartaric acid	Phenolic acids	Phenolic acids	-	B	5032.6	5513.7	5712.8	4916.1	3153.8	3998	39070	33029	38449	--	--
Lmhp009802	504.31	363.29	503.301	C25H46NO7P	[M+H]+	LysoPE 20:3(2n isomer)	Lipids	LPE	-	B	29278	20474	27522	17772	16928	16798	30139	31735	30377	--	--
mws1589	503.16	179	504.169	C18H32O16	[M-H]-	Panose	Others	Saccharides and Alcohols	33401-87-5	A	16751	12977	11484	16771	15516	21060	187540	186490	152090	C00713	--
pme0500	503.16	323	504.169	C18H32O16	[M-H]-	D-(+)-Melezitose	Others	Saccharides and Alcohols	597-12-6	B	10829	6445.1	4312.9	14551	15965	12063	97504	63156	75432	--	--
pme2125	503.44	179	504.169	C18H32O16	[M-H]-	Raffinose	Others	Saccharides and Alcohols	-	B	30734	24467	22213	25433	21303	22772	380420	406770	348840	--	--
pmp000271	505.35	423.33	504.345	C30H48O6	[M+H]+	1β,2α,3α,19α-Tetrahydroxyurs-12-en-28-oic acid	Terpenoids	Triterpene	-	A	1418800	1292800	1416200	600750	587870	841200	5589000	6335700	6410200	--	--
Zmcn010211	503.34	485.32	504.345	C30H48O6	[M-H]-	Roxburic Acid	Terpenoids	Triterpene Saponin	-	A	532160	542210	541270	51512	36695	28608	847220	825230	879270	--	--
Hmln003605	503.34	485.33	504.346	C30H48O6	[M-H]-	Myrianthic acid	Terpenoids	Triterpene	89786-84-5	A	9	9	9	91685	80098	83150	1037700	1077800	1089100	--	--
Lmhp010514	506.32	365.31	505.317	C25H48NO7P	[M+H]+	LysoPE 20:2(2n isomer)	Lipids	LPE	-	B	10428	12905	12317	9324.4	10168	12334	9773.5	9034.9	8734.3	--	--
Lmhp008718	506.32	184.07	505.317	C25H48NO7P	[M+H]+	LysoPC 17:2	Lipids	LPC	-	A	263000	261600	303910	291670	281500	306810	228060	205170	196670	--	--
Lmhp010757	506.32	365.31	505.317	C25H48NO7P	[M+H]+	LysoPE 20:2	Lipids	LPE	-	B	24117	23698	24016	20275	18710	19694	18849	17413	16529	--	--
Hmln002199	505.1	300.03	506.107	C23H22O13	[M-H]-	Quercetin-3-O-(6''-O-acetyl)-galactoside	Flavonoids	Flavonols	-	A	94274	86483	141970	136680	94340	129520	145640	165230	189630	--	--
pmb0803	508.18	152.4	507.174	C24H29NO11	[M+H]+	Pyridoxine O-feruloyl hexoside	Others	Vitamin	-	B	9	9	9	5276.6	3929.4	5727.9	3265.9	4708.3	7754.5	--	--
Lmhp009590	508.34	184.07	507.332	C25H50NO7P	[M+H]+	LysoPC 17:1	Lipids	LPC	-	A	352980	347150	397850	396760	414370	448840	604360	585460	580850	--	--
Lmhp010515	510.36	184.07	509.348	C25H52NO7P	[M+H]+	LysoPC 17:0(2n isomer)	Lipids	LPC	-	B	13452	13569	13903	5861	6505.2	8369.6	18634	16415	21665	--	--
Cmsn001563	513.09	361.08	514.095	C21H22O15	[M-H]-	1,7-Di-O-galloyl-D-sedoheptulose	Tannins	Tannin	-	B	14562	18572	20314	17162	8665	11950	10026	18798	25929	--	--
Lmhp009526	515.32	261.22	514.314	C27H46O9	[M+H]+	2-γ-Linolenoyl-glycerol-glucoside	Lipids	Glycerol ester	-	B	305050	278150	308130	33589	42333	47225	42388	43192	33891	--	--
Lmhp009773	515.32	261.22	514.314	C27H46O9	[M+H]+	1-α-Linolenoyl-glycerol-glucoside	Lipids	Glycerol ester	-	B	30280	38444	38622	9252.5	7568.2	7207.8	11094	11601	11288	--	--
Hmqp006235	516.3	184.07	515.297	C21H46N3O9P	[M+H]+	LysoPC 18:4	Lipids	LPC	-	B	25751	29741	35285	37403	37609	38867	76853	77476	71604	--	--
Lmhp010334	517.34	263.24	516.33	C27H48O9	[M+H]+	2-Linoleoylglycerol-glucoside	Lipids	Glycerol ester	-	B	13883	20536	16198	1773.1	9	949.13	3939.5	2129.7	2661	--	--
pmp001279	518.32	459.25	517.313	C21H48N3O9P	[M+H]+	Bis(N,N-diethylethanaminium)-2-acetamido-1,5-anhydro-2-deoxy-1-[-hydroxy(phosphonato)methyl]-D-glucitol	Alkaloids	Alkaloids	-	A	793680	739860	783440	967040	979980	1017200	3008700	3024200	2958800	--	--
pmb0854	518.32	184.07	517.317	C26H48NO7P	[M+H]+	LysoPC 18:3	Lipids	LPC	-	A	863420	858920	950420	1110800	986560	1052600	2419700	2716300	2529900	--	--
pmb0865	518.32	184.07	517.317	C26H48NO7P	[M+H]+	LysoPC 18:3(2n isomer)	Lipids	LPC	-	A	2121500	2013000	2375100	2660200	2682300	2974800	2781900	2959200	2472700	--	--
pmn001424	517.23	385.18	518.236	C24H38O12	[M-H]-	(6S,7E,9R)-6,9-Dihydroxy-4,7-megastigmadin-3-one-9-O-D-xylopyranosyl(1-6)-glucopyranoside	Others	Others	-	B	9	9	9	10690	14843	17245	52867	47159	26520	--	--
pmp001251	520.34	184.07	519.332	C26H50NO7P	[M+H]+	LysoPC 18:2(isomer)	Lipids	LPC	-	A	2971300	3008900	3283700	2708500	2846300	3191200	2347800	2435300	2282600	--	--
pmn001378	519.19	357.14	520.194	C26H32O11	[M-H]-	Terpineol monO-glucoside	Lignans and Coumarins	Lignans	-	B	2008400	2201200	2198800	3912900	3884700	3938700	5087200	4956900	4611800	--	--
pmp001281	522.36	184.07	521.348	C26H52NO7P	[M+H]+	LysoPC 18:1	Lipids	LPC	-	A	1242400	1175300	1337700	2540600	2573500	2675100	9760700	10074000	9788100	--	--
Lmhp010190	522.36	184.07	521.348	C26H52NO7P	[M+H]+	LysoPC 18:1(2n isomer)	Lipids	LPC	-	B	11416000	10987000	11668000	21486000	23491000	24447000	42713000	44047000	41458000	--	--
mws0126	524.37	184.07	523.364	C26H54NO7P	[M+H]+	LysoPC 18:0	Lipids	LPC	19420-57-6	B	1003700	1038500	1069600	833370	810770	836700	2463000	2334800	2345100	--	--
pmd0136	524.37	184.07	523.364	C26H54NO7P	[M+H]+	LysoPC 18:0(2n isomer)	Lipids	LPC	-	B	68307	78063	77286	39288	37461	28242	102250	96591	98987	--	--
Lmhn003801	531.12	337.06	532.122	C25H24O13	[M-H]-	Feruloylsinapoyltartaric acid	Phenolic acids	Phenolic acids	-	B	2592.3	2744.4	4009.6	5632.2	6397.3	5140	49063	48994	47340	--	--
Lmhp007840	534.36	184.07	533.348	C27H52NO7P	[M+H]+	LysoPC 19:2	Lipids	LPC	-	B	12170	12088	12588	4634.5	4161.8	5976.3	5035	6130.6	6873.9	--	--
Lmhp007598	534.36	184.07	533.348	C27H52NO7P	[M+H]+	LysoPC 19:2(2n isomer)	Lipids	LPC	-	B	90183	74010	99472	77720	73928	79758	103330	105880	99819	--	--
Hmln002402	533.1	489.11	534.101	C24H22O14	[M-H]-	Kaempferol-3-O-(6''-malonyl)-galactoside	Flavonoids	Flavonols	-	B	18872	12751	14189	25051	32452	25375	628710	569210	570030	--	--
pmb0542	535.11	287.06	535.109	C24H23O14+	[M]+	Cyanidin-3-O-(6''-Malonylglucoside)	Flavonoids	Anthocyanins	171828-62-9	B	13680	10764	16713	14713	16528	13480	12819	15546	11951	C12643	ko00942
Lmhp010908	536.37	184.07	535.364	C27H54NO7P	[M+H]+	LysoPC 19:1	Lipids	LPC	-	B	36575	35202	40728	52525	51597	54601	45424	47630	48571	--	--
Zmhn002664	535.16	307.08	536.169	C27H26O10	[M-H]-	p-Coumalic-piceid	Others	Stilbene	-	B	13526	11538	11253	9671.1	9589.5	9638.1	9058.1	11820	8203.9	--	--
pmb2228	538.39	184.07	537.379	C27H56NO7P	[M+H]+	LysoPC 19:0	Lipids	LPC	108273-88-7	B	4692.1	3097.4	4475.9	3247.7	2741.4	2789.4	17319	17401	18956	--	--
Lmhp008742	542.32	184.07	541.317	C28H48NO7P	[M+H]+	LysoPC 20:5	Lipids	LPC	162440-04-2	B	1070.5	734.74	1520.8	3270	2220.8	3719	2565.1	2069.4	3342.8	--	--
pmp001274	542.32	483.25	541.317	C28H48NO7P	[M+H]+	2-Hydroxy-5,8,11,14,17-icosapentaenoyloxy]propyl-2-(trimethylammonio)ethyl phosphate	Alkaloids	Alkaloids	-	A	643390	619860	663940	754800	708140	786620	1275300	1165400	1249600	--	--
pmc0960	544.34	184.07	543.332	C28H50NO7P	[M+H]+	LysoPC 20:4	Lipids	LPC	-	B	2083.1	2021.2	2185.4	7819.4	5782.8	6190.3	4370.1	5229.5	4903.3	--	--
pmp001282	544.34	485.27	543.333	C28H50NO7P	[M+H]+	Propyl2-(trimethylammonio)ethyl phosphate	Others	Others	-	A	117690	115590	128380	202540	233960	246590	2191200	2416800	2291400	--	--
Lmhp009890	546.36	184.07	545.348	C28H52NO7P	[M+H]+	LysoPC 20:3	Lipids	LPC	-	B	67712	59586	74218	32241	33758	31414	38317	34086	31444	--	--
pmd0147	548.37	184.07	547.364	C28H54NO7P	[M+H]+	LysoPC 20:2	Lipids	LPC	-	B	185810	162450	180600	117400	102020	106600	125450	102650	104190	--	--
Lmhp011549	550.39	184.07	549.379	C28H56NO7P	[M+H]+	LysoPC 20:1	Lipids	LPC	-	B	9528.4	8240.2	9923	15245	17391	16509	36606	40310	34647	--	--
Hmln002189	549.09	505.11	550.096	C24H22O15	[M-H]-	Quercetin-3-O-(6''-O-malonyl)-galactoside	Flavonoids	Flavonols	-	A	321670	305510	415180	506540	377920	500170	732660	581690	696990	--	--
pmp000589	551.1	303.05	550.096	C24H22O15	[M+H]+	Quercetin-7-O-(6'-O-malonyl)-β-D-glucoside	Flavonoids	Flavonols	-	A	39569	38876	53747	40492	44106	44448	55422	59064	66426	--	--
pmp000273	563.15	139.04	562.148	C30H26O11	[M+H]+	Gambiriin B3	Tannins	Proanthocyanidins	76236-90-3	B	512970	496570	612550	1465900	1328300	1458400	1420800	1332700	1332400	C17777	--
pmb3114	561.14	289.2	562.148	C30H26O11	[M-H]-	Epicatechin-epiafzelechin	Flavonoids	Flavanols	-	A	642620	582730	691620	1237400	1129300	1348100	1192500	1173000	1298700	--	--
pmb2922	565.05	323.1	566.055	C15H24N2O17P2	[M-H]-	Uridine 5'-diphospho-D-glucose	Nucleotides and derivatives	Nucleotides and derivatives	133-89-1	B	3338200	4114500	3896100	972890	1194700	1224600	1745200	1551700	1697400	C00029	ko00040,ko00052,ko00053,ko00240,ko00500,ko00520,ko00561,ko00908,ko01100,ko01110
pmp001215	571.25	361.2	570.247	C31H38O10	[M+H]+	Euryalin A	Lignans and Coumarins	Lignans	-	B	6346.2	8000.9	6052	10631	10163	11549	3846.8	2830.3	3498.8	--	--
pmb0837	577.13	425.3	576.127	C30H24O12	[M+H]+	Procyanidin A3	Tannins	Proanthocyanidins	86631-39-2	B	2507100	1959100	1979900	1914200	2346900	1923400	1343000	1250000	1215000	--	--
mws0836	577.14	425.1	578.142	C30H26O12	[M-H]-	Procyanidin B1	Tannins	Proanthocyanidins	20315-25-7	A	358050	326090	390190	456630	450420	447450	429160	425940	524230	--	--
pme0434	577.14	407.1	578.142	C30H26O12	[M-H]-	Procyanidin B2	Tannins	Proanthocyanidins	29106-49-8	B	3767700	3839700	4025800	4551900	3589100	4125900	3844700	4393900	4247400	C17639	--
pme0436	577.14	407.1	578.142	C30H26O12	[M-H]-	Procyanidin B3	Tannins	Proanthocyanidins	23567-23-9	A	20069000	19810000	20043000	19285000	21713000	19667000	20054000	18983000	20619000	--	--
pme2493	579.17	287.1	578.164	C27H30O14	[M+H]+	Kaempferol-3,7-O-dirhamnoside(Kaempferitrin)	Flavonoids	Flavonols	482-38-2	B	567870	894720	1346300	444960	617150	900880	732200	856450	668640	C16981	--
pmp000275	581.17	139.04	580.158	C30H28O12	[M+H]+	Gambiriin A1	Tannins	Proanthocyanidins	76250-49-2	A	1447500	1366800	1832900	4281700	3608700	3586900	4795100	4758100	4085300	C17772	--
HJN074	591.15	289.07	592.158	C31H28O12	[M-H]-	Procyanidin A6	Tannins	Proanthocyanidins	-	B	40899	38795	37069	71490	59592	65296	55668	56808	70890	--	--
pmb2936	591.17	367.2	592.179	C28H32O14	[M-H]-	Disinapoyl hexoside	Phenolic acids	Phenolic acids	-	B	1449.8	1713	2704.3	5734.7	5654.9	7682.2	64634	68723	65529	--	--
Lmlp006927	593.28	533.25	592.269	C35H36N4O5	[M+H]+	2-[4-(2-{[3-(2-Amino-2-oxoethyl)-5-methoxy-2-methyl-1H-indol-1-yl]methyl } phenoxy)butoxy]-N-(pyridin-3-yl)benzamide	Alkaloids	Alkaloids	-	B	1473400	1245900	1299300	427220	483120	513070	68473	66121	69873	--	--
Lmmp004326	595.14	287.05	594.137	C30H26O13	[M+H]+	Kaempferol-7-O-β-D-(6''-O-(E)-p-coumaroyl)galactoside	Flavonoids	Flavonols	-	A	3131700	4160400	4196700	1239500	804560	867910	161970	176190	192730	--	--
Lmmp003217	595.14	287.06	594.137	C30H26O13	[M+H]+	Kaempferol 3-O-β-d-(6''-O-(E)-p-coumaroyl) glucopyranoside	Flavonoids	Flavonols	-	B	3145000	4000700	4463700	1276300	810840	873910	175560	182360	204120	--	--
Lmmp001798	595.14	287.05	594.137	C30H26O13	[M+H]+	Gallocatechin-catechin isomer	Tannins	Proanthocyanidins	-	B	517710	564710	464280	418060	453160	492990	377820	431990	373990	--	--
mws1073	595.17	457.2	594.158	C27H30O15	[M+H]+	Apigenin 6,8-C-diglucoside	Flavonoids	Flavonoid	23666-13-9	A	133040	135540	117960	282380	265440	223070	257970	277650	263710	--	--
Lmbp003230	595.16	287.05	594.158	C27H30O15	[M+H]+	Kaempferol-3-O-neohesperidoside	Flavonoids	Flavonoid	32602-81-6	A	834230	1083500	1113600	996760	775590	859210	458910	512530	479330	--	--
pmp000593	595.17	449.1	594.158	C27H30O15	[M+H]+	Luteolin-7-O-rutinoside	Flavonoids	Flavonoid	3563-98-2	B	306360	334730	343810	355210	263050	301170	185190	185760	185890	--	--
pme1793	595.17	271.06	595.166	C27H31O15+	[M]+	Pelargonidin-3,5-diglucoside	Flavonoids	Anthocyanins	17334-58-6	B	280090	250170	298420	247330	265980	266150	225300	247220	175830	C08725	ko00942
pme1773	595.17	287.06	595.166	C27H31O15+	[M]+	Cyanidin-3-O-rutinoside (Keracyanin)	Flavonoids	Anthocyanins	28338-59-2	B	828860	892070	911990	861230	954090	956230	767800	768290	665880	C08620	ko00942
Lmyp003348	601.12	287.06	600.112	C28H24O15	[M+H]+	Kampferol 3-O-(6″-galloyl)-β-D-galactopyranoside	Flavonoids	Flavonoid	-	B	98548	119030	141500	429810	336980	413270	117130	155950	154660	--	--
Zmcn005289	607.13	463.09	608.138	C27H28O16	[M-H]-	Quercetin-3-o-[6 ''-O-(3-hydroxy-3-methylglutaryl)-glucoside	Flavonoids	Flavonoid	-	A	25042000	30300000	29276000	28362000	26891000	32698000	23451000	22309000	24355000	--	--
Lmyp004052	611.14	303.05	610.132	C30H26O14	[M+H]+	Quercetin 3-O-(6''-trans-p-Coumaroyl)-β-D-galactopyranoside	Flavonoids	Flavonoid	-	A	815740	946240	921030	561830	357010	434040	190750	179290	193150	--	--
Hmmp002336	611.16	303.04	610.148	C30H26O14	[M+H]+	Quercetin-O-feruloyl-Pentoside	Flavonoids	Flavonols	-	A	4529800	4449800	5022800	2688000	2460800	2579700	2292200	2367700	2556500	--	--
pmb0665	611.16	465.1	610.153	C27H30O16	[M+H]+	Luteolin-8-C-hexosyl-O-hexoside	Flavonoids	Flavonoid	-	B	123970	95320	135810	71314	65222	76628	69149	58886	77440	--	--
mws0059	609.15	301	610.153	C27H30O16	[M-H]-	Quercetin-3-O-rutinoside (Rutin)	Flavonoids	Flavonols	153-18-4	A	498620	490760	529040	428700	349780	321560	299020	415820	375000	C05625	ko00944,ko01100,ko01110
Lmyp003139	617.11	303.05	616.106	C28H24O16	[M+H]+	Quercetin 3-O-(6′′-galloyl)-β-D-galactopyranoside	Flavonoids	Flavonoid	53171-28-1	B	468000	542420	540760	2248300	1900900	2293800	591180	707560	593410	--	--
Lmfp003026	619.13	153.02	618.122	C28H26O16	[M+H]+	Maplexin H	Tannins	Tannin	-	B	2115600	1840800	1853300	1398600	1067400	1326200	699970	875140	766790	--	--
pmp000781	619.4	437.34	618.392	C39H54O6	[M+H]+	p-Coumaroyleuscaphic acid	Terpenoids	Triterpene	-	B	3483000	3348900	3367000	2649600	2990600	3607600	1920500	1920600	1673600	--	--
pmn001506	617.41	455.4	618.413	C36H58O8	[M-H]-	Oleanolic acid 2-O-β-D-glucopyranoside	Terpenoids	Triterpene Saponin	14162-53-9	B	6126.5	5721	6712.3	2465.2	1820.5	1612.1	1696.5	1056.2	1023	--	--
pmp001310	627.16	303.1	626.148	C27H30O17	[M+H]+	6-Hydroxykaempferol-3,6-O-Diglucoside	Flavonoids	Flavonols	-	A	574920	625940	661990	505170	695840	780670	49153	55307	57286	--	--
pmn001529	629.08	169	630.086	C28H22O17	[M-H]-	Tri-O-Galloylshikimic acid	Phenolic acids	Phenolic acids	-	B	356230	273800	329780	410830	351360	438830	280450	281750	267040	--	--
Hmln002480	633.08	300.99	632.067	C27H22O18	[M-H]-	Galloyl-HHDP(Hexahydroxydiphenoyl)-glueopy ranose	Tannins	Tannin	-	B	152320	98176	117350	147420	133160	106260	907570	968370	1025800	--	--
Lmhn002379	633.07	301	634.079	C27H22O18	[M-H]-	Strictinin	Tannins	Proanthocyanidins	-	B	379520	373780	156560	134360	157650	154180	924090	1076700	1203400	--	--
Cmhn001271	633.08	463.05	634.08	C27H22O18	[M-H]-	Gemin D	Tannins	Tannin	-	A	1436000	1453500	1436800	602220	625970	661160	507330	480960	633260	--	--
Wmhn003618	633.07	301	634.081	C27H22O18	[M-H]-	Galloyl-ellagyl-glucose	Tannins	Tannin	-	B	13339000	13343000	13664000	10744000	11097000	10690000	7673300	10227000	8784700	--	--
pmn001622	633.07	275	634.081	C27H22O18	[M-H]-	Hexahydroxydiphenoyl galloylglucose	Phenolic acids	Phenolic acids	-	A	9	9	9	9	9	9	1005000	1287800	1370800	--	--
pmp000782	635.39	435.32	634.387	C39H54O7	[M+H]+	Caffeoyl hawthorn acid	Terpenoids	Triterpene	-	B	8788600	8038700	8753200	8397100	8001000	8932000	6588000	7522800	6748100	--	--
Hmyp007792	636.41	495.4	635.414	C32H62NO9P	[M+H]+	PE(oxo-11:0/16:0)	Lipids	Glycerol ester	-	B	39100	30508	33057	228290	222120	266010	138100	125880	123470	--	--
Lmfn001062	635.09	169.01	636.096	C27H24O18	[M-H]-	2,4,6-Tri-O-galloyl-D-glucose	Tannins	Tannin	108043-99-8	B	58206	76848	74301	150070	116620	127410	71870	81031	98884	--	--
Lmfn001209	635.09	169.01	636.096	C27H24O18	[M-H]-	1,3,6-Tri-O-galloyl-D-glucose	Tannins	Tannin	18483-17-5	B	485350	392740	382010	93674	127260	90501	42441	51574	43254	C17458	--
pmn001531	635.09	331.1	636.096	C27H24O18	[M-H]-	2,4,6-Tri-O-galloyl-β-D-glucose	Phenolic acids	Phenolic acids	-	B	246550	257080	257050	274800	287090	303220	88761	95824	96622	--	--
HmLn001743	635.09	483.08	636.097	C27H24O18	[M-H]-	1,3,6-Tri-O-galloyl-β-glucopyranoside	Tannins	Tannin	-	A	711040	806390	864370	340300	377670	396270	190840	169430	204320	--	--
HmdP001663	637.1	153.01	636.097	C27H24O18	[M+H]+	1,2,6-Tri-O-galloyl-β-D-glucose	Tannins	Tannin	-	B	11417	12298	10921	10526	9924.3	11810	7249	5763.7	7897.1	--	--
pmn001533	645.13	169	646.138	C26H30O19	[M-H]-	2-O-Di-gallic acyl-β-D-Glucopyranoside-β-D-Glucopyranoside	Phenolic acids	Phenolic acids	-	B	47040	45235	33163	19705	18808	14953	5102.2	9	7748.9	--	--
Zmcp007374	651.41	489.36	650.403	C36H58O10	[M+H]+	Kaji-Ichigoside F1	Terpenoids	Triterpene	-	A	980350	963720	995240	790390	807560	831830	606320	535940	612270	--	--
pmb0530	664.12	136.2	663.109	C21H27N7O14P2	[M+H]+	Nicotinic acid adenine dinucleotide	Nucleotides and derivatives	Nucleotides and derivatives	53-84-9	B	1820100	1527800	1703100	450630	496730	574880	822160	899270	886730	C00003	ko00190,ko00730,ko00760,ko01100
pmp000780	665.4	409.3	664.398	C40H56O8	[M+H]+	3-O-Trans-feruloyl euscaphic acid	Terpenoids	Triterpene	-	A	478020	449780	439280	898700	960360	845880	1842500	2051300	1993000	--	--
pmb2819	665.1	218.1	666.201	C27H38O19	[M-H]-	O-Caffeoyl maltotriose	Phenolic acids	Phenolic acids	-	B	9	9	9	18007	23741	18980	88282	75349	99474	--	--
pmp001275	672.42	331.29	671.409	C31H61O14N	[M+H]+	3-Hydroxypropyl palmitate glc-glucosamine	Alkaloids	Alkaloids	-	B	95944	84053	104370	81630	70264	74068	136250	146050	140510	--	--
Lmhp008744	677.37	261.22	676.367	C33H56O14	[M+H]+	1-α-Linolenoyl-glycerol-diglucoside	Lipids	Glycerol ester	-	B	10117	10893	12168	3059.1	2570	4133.8	2009.8	2744.8	1450.4	--	--
Lmhp008513	677.37	261.22	676.367	C33H56O14	[M+H]+	2-γ-Linolenoyl-glycerol-diglucoside	Lipids	Glycerol ester	-	B	240840	187360	230980	28039	29680	44376	26895	38752	37003	--	--
pmp001276	677.37	677.37	676.367	C33H56O14	[M+H]+	2,3-Dihydroxypropyl-9,12,15-octadecatrienoate-hexose-hexose	Lipids	Free fatty acids	-	B	242270	194110	240410	149900	175860	159810	456130	381330	384200	--	--
Lmhp009190	679.39	263.24	678.383	C33H58O14	[M+H]+	2-Linoleoylglycerol-diglucoside	Lipids	Glycerol ester	-	B	16478	20104	10881	3339.7	3559.4	2723.2	3736	5152.5	3777.4	--	--
Lmmn004145	675.41	397.14	679.419	C38H60O10	[M-H]-	3-O-(2-O-Acetyl-β-D-glucopyranosyl) oleanolic acid	Terpenoids	Triterpene	-	B	1871500	1772300	1831100	276840	282980	319920	254780	267230	261960	--	--
pmb0168	700.1	184.4	699.435	C38H70NO8P	[M+H]+	PC 16:1/14:1	Lipids	PC	-	B	60827	72888	59148	68725	62340	74681	110540	103180	126050	--	--
Hmyp007396	702.46	184.07	701.46	C37H68NO9P	[M+H]+	PC(oxo-11:0/18:2)	Lipids	PC	-	B	10004	7527.5	6867.1	27028	29070	28310	12787	16740	14561	--	--
Lmhn002727	729.15	577.13	730.152	C37H29O16	[M-H]-	(EC→EC)g(1)	Tannins	Proanthocyanidins	-	B	26640000	28978000	29535000	41000000	41593000	40139000	38532000	41121000	36952000	--	--
pme2651	742.1	620.1	743.075	C21H28N7O17P3	[M-H]-	NADP (Nicotinamide adenine dinucleotide phosphate)	Nucleotides and derivatives	Nucleotides and derivatives	53-59-8	B	66957	91927	74193	125830	119680	138870	264260	278980	250510	C00006	ko00195,ko00480,ko00760,ko01100
Hmdp001794	769.09	303.05	768.118	C35H28O20	[M+H]+	Quercetin-3-O-(2'',3''-digalloyl)-β-D-glucopyranoside	Flavonoids	Flavonols	-	B	459680	397610	446710	270080	284650	290280	96580	82349	93376	--	--
Hmmp006067	798.5	439.36	780.467	C42H68O13	[M+NH4]+	Oleanolic acid-O-Hexoside-O-Hexoside	Terpenoids	Triterpene Saponin	-	B	9	9	9	9	9	9	9	9	9	--	--
Cmhn001103	783.07	481.06	784.075	C34H24O22	[M-H]-	Pedunculagin	Tannins	Tannin	-	A	1227400	1120900	1250200	1010400	1010400	954230	614740	516390	588780	--	--
pme2746	784.15	437	785.157	C27H33N9O15P2	[M-H]-	Flavin adenine dinucleotide(FAD)	Nucleotides and derivatives	Nucleotides and derivatives	146-14-5	B	6904.8	6887.2	5713	12533	20021	14217	44055	55575	50757	C00016	ko00740,ko01100,ko01110
Wmhn001788	785.08	301	786.083	C34H26O22	[M-H]-	Digalloyl-HHDP-glucose	Tannins	Tannin	-	B	411900	431110	447160	535150	581680	606330	334430	276100	291260	--	--
Cmhn002756	785.07	633.06	786.092	C34H26O22	[M-H]-	heterophylliin A	Tannins	Tannin	87687-52-3	A	692090	560750	665640	1058700	1207800	1185800	484770	619310	658900	--	--
Lmsn002071	785.08	301	786.092	C34H26O22	[M-H]-	Tellimagrandin I	Tannins	Tannin	79786-08-6	A	2182900	2363100	2471100	665170	795340	791600	427480	469770	363610	--	--
HmdP001587	785.09	301	786.092	C34H26O22	[M-H]-	Tercatain	Tannins	Tannin	103744-87-2	A	2438000	2003000	2909800	754310	815040	932960	399460	467990	424400	--	--
pmn001534	787.1	617.08	788.107	C34H28O22	[M-H]-	1,2,3,6-Tetra-O-Galloyl-D-Glucose	Phenolic acids	Phenolic acids	79886-50-3	A	7954300	8394900	7038900	4967400	4160800	3941400	1799000	1421800	1703500	--	--
pmn001646	865.2	577.1	866.206	C45H38O18	[M-H]-	Procyanidin C1	Tannins	Proanthocyanidins	37064-30-5	A	4063400	4119700	3771800	3801100	4569200	4590600	3517500	3789700	3066200	C17624	--
pmb2947	865.2	407.1	866.206	C45H38O18	[M-H]-	Catechin-catechin-catechin	Flavonoids	Flavanols	-	B	1327700	1180200	1727700	1519700	1830000	1610100	1481500	1446900	1437900	--	--
pmp000280	867.21	577.13	866.206	C45H38O18	[M+H]+	Procyanidin C2	Tannins	Proanthocyanidins	37064-31-6	A	13604000	14551000	15082000	16067000	14866000	15418000	12634000	11592000	11052000	--	--
Cmhn001973	867.09	433.05	868.096	C38H28O24	[M-H]-	Ellagic acid pentoside dimer	Tannins	Tannin	-	A	2981.2	4772.5	2975.2	20570	29802	28634	17572	22050	14316	--	--
Lmmp002068	883.21	593.13	882.201	C45H38O19	[M+H]+	Gallocatechin-catechin-catechin	Tannins	Proanthocyanidins	-	B	36566	37451	37064	112870	100360	126210	29795	32474	32380	--	--
Cmhn002244	933.07	631.06	934.071	C41H26O26	[M-H]-	Glansrin C	Tannins	Tannin	-	A	104020	106810	121070	32641	28032	22716	6766	7417.3	4581.2	--	--
Cmhn002124	933.07	631.06	934.071	C41H26O26	[M-H]-	Praecoxin D	Tannins	Tannin	-	A	95681	130790	130910	30110	21582	21551	4035.3	3690	3136.4	--	--
pmf0426	939.11	769.09	940.118	C41H32O26	[M-H]-	1,2,3,4,6-Penta-O-Galloyl-D-Glucose	Phenolic acids	Phenolic acids	14937-32-7	A	206640	252050	198060	123630	102700	119680	24413	22614	19060	C04576	--
Cmhn001621	951.09	783.08	952.081	C41H28O27	[M-H]-	Praecoxin A	Tannins	Tannin	85137-27-5	B	3233700	3303800	3151100	4080800	3953500	3453200	1470600	1982600	1980600	--	--
Lmhn002068	951.08	179.03	952.081	C41H28O27	[M-H]-	PraecoxinA	Tannins	Proanthocyanidins	-	A	93265	103540	92786	70020	76160	60737	9504.4	9084.8	15457	--	--
Lmhn002535	1017.21	729.15	1018.22	C52H41O23	[M-H]-	(EC→EC→EC)g(2)	Tannins	Proanthocyanidins	-	B	981830	957800	974040	1018700	1123300	981170	568480	649110	628650	--	--
Lmhn002310	1017.21	865.19	1018.22	C52H41O22	[M-H]-	(EC→EC→EC)g(1)	Tannins	Proanthocyanidins	-	B	333660	267060	326590	342620	272710	308320	164460	184530	156780	--	--
HJN099	1017.21	729.15	1018.22	C52H42O22	[M-H]-	Procyanidin trimeric monoester	Tannins	Proanthocyanidins	-	B	53640	68386	67781	55416	75313	59582	59768	49271	46250	--	--
Lmpp003705	1019.22	731.16	1018.22	C52H42O22	[M+H]+	Procyanidin C1 3'-O-gallate	Tannins	Proanthocyanidins	-	B	59594	53036	72858	200000	179840	163040	163300	150380	126440	--	--
HJAP144	1019.22	731.16	1018.22	C52H42O22	[M+H]+	Galloyl-procyanidin C2	Tannins	Proanthocyanidins	-	B	1423200	1369100	1365000	1613400	1772300	1756200	1100900	1150100	1127800	--	--
Cmhn001480	1067.13	1023.14	1068.13	C46H36O30	[M-H]-	Pterocarinin A	Tannins	Tannin	-	A	114200	91889	113510	98357	98405	100480	112650	114330	130110	--	--
Cmhn001843	1103.09	1059.11	1104.09	C48H32O31	[M-H]-	Glansrin A	Tannins	Tannin	-	A	330290	256660	372300	404940	228210	324490	93435	68614	84584	--	--
Cmhn001994	1103.09	1059.1	1104.09	C48H32O31	[M-H]-	Platycaryanin A	Tannins	Tannin	-	A	353280	297390	381040	366420	402270	415680	79370	65259	84542	--	--
pmn001650	1153.26	575.1	1154.27	C60H50O24	[M-H]-	Cinnamtannin B2	Tannins	Proanthocyanidins	88038-12-4	A	1226700	1146400	1140700	1047900	922680	1097900	720500	784870	722200	C17629	--
Cmhn001534	1207.16	917.08	1208.15	C56H40O31	[M-H]-	Stenophyllanin A	Tannins	Tannin	-	A	8301.5	7751.5	15473	25570	20810	30262	27362	13090	12412	--	--

## Sheet: Table S2
Table S2. List of characteristic metabolites identified in each growth.
(A) The list of characteristic metabolites identified in Rr5-30
Index	Formula	Compounds	Class I	Peak area									Rr5-30_vs_Rr5-60	Rr5-30_vs_Rr5-90	Rr5-60_vs_Rr5-90	kegg_map
				Rr5-30-1	Rr5-30-2	Rr5-30-3	Rr5-60-1	Rr5-60-2	Rr5-60-3	Rr5-90-1	Rr5-90-2	Rr5-90-3
pme3017	C4H9NO2	2-Aminoisobutyric acid	Amino acids and derivatives	3143000	3315600	3160200	859950	921630	931800	1444000	1355400	1358800	down	down	FALSE	--
pme0010	C3H7NO3	L-Serine	Amino acids and derivatives	4921600	5228400	4641000	383370	383080	400390	222600	202910	203000	down	down	FALSE	ko00260,ko00261,ko00270,ko00460,ko00600,ko00630,ko00920,ko00970,ko01100,ko01110,ko01200,ko01230,ko01502,ko02010
mws0230	C4H9NO3	L-(-)-Threonine	Amino acids and derivatives	5309500	4926500	4728900	1088700	1199100	1104500	1423100	1305000	1329400	down	down	FALSE	ko00260,ko00261,ko00290,ko00860,ko00970,ko01100,ko01110,ko01230,ko02010
pme0008	C6H13N3O3	L-Citrulline	Amino acids and derivatives	902610	862140	962870	299730	223760	271620	187820	183010	231810	down	down	FALSE	ko00220,ko01100,ko01110,ko01230
mws0193	C7H15N3O3	L-Homocitrulline	Amino acids and derivatives	264710	239640	246950	92777	68893	87619	114890	92853	94098	down	down	FALSE	--
pme0278	C7H14N2O4	2,6-Diaminooimelic acid	Amino acids and derivatives	169540	153050	154570	66761	68476	67497	44658	43354	47412	down	down	FALSE	ko00300,ko01100,ko01110,ko01230
mws0001	C4H8N2O3	L-Asparagine	Amino acids and derivatives	58147000	64430000	62550000	11178000	12371000	11915000	2130000	2081000	1917700	down	down	down	ko00250,ko00460,ko00970,ko01100,ko01110,ko01230
mws0183	C7H6O4	Protocatechuic acid	Phenolic acids	511360	478020	457000	88145	90390	108590	54392	59320	105700	down	down	FALSE	ko01100,ko01110
mws1500	C11H12O2	Ethyl cinnamate	Phenolic acids	4584700	4344800	4742000	1733100	1758000	1715100	1548100	1626900	1584400	down	down	FALSE	--
Hmgp002428	C10H10O3	4-Hydroxy-3-methoxycinnamaldehyde	Phenolic acids	67812	76011	91195	31090	33758	24614	42514	29356	28653	down	down	FALSE	--
pmn001669	C12H14O5	Methyl sinapate	Phenolic acids	5059.3	4871.6	6485.3	2644.3	1645.1	1371.2	3175.4	2434.7	2029.7	down	down	FALSE	--
Lmhn202452	C13H12O8	cis-p-Coumaroyltartaric acid (cis-Coutaric acid)	Phenolic acids	51142	31928	34679	9566	9553	13743	15852	17073	18442	down	down	FALSE	--
pmp000260	C13H16O10	6-O-Galloyl-β-D-glucopyranoside	Phenolic acids	484590	376510	394540	117240	70914	141870	75449	62311	67490	down	down	FALSE	--
pmp000261	C14H18O10	Methyl 6-O-galloyl-β-D-glucopyranoside	Phenolic acids	349690	312170	311780	8187.3	9469.4	7897.7	10584	9285.5	10526	down	down	FALSE	--
pma3724	C17H20O9	1-O-Feruloyl quinic acid	Phenolic acids	84932	63565	79598	18745	19838	18990	11082	16606	13750	down	down	FALSE	--
pmn001526	C20H20O14	1,6-Di-O-Galloyl-D-Glucose	Phenolic acids	172230	181450	201750	89213	69637	61480	23440	24656	54094	down	down	FALSE	--
pmn001516	C14H14O9	5-Galloylshikimic acid	Phenolic acids	40725000	37985000	40726000	16459000	15950000	16095000	3742700	3466500	3456300	down	down	down	--
Lmhn003543	C22H18O10	di-p-Coumaroyltartaric acid	Phenolic acids	1425100	2113300	1459200	358950	256900	306340	101690	115050	163930	down	down	down	--
pme0458	C22H18O10	Catechin gallate	Phenolic acids	562100	620740	713820	260170	264050	276150	122900	85632	103730	down	down	down	--
pmb2922	C15H24N2O17P2	Uridine 5'-diphospho-D-glucose	Nucleotides and derivatives	3338200	4114500	3896100	972890	1194700	1224600	1745200	1551700	1697400	down	down	FALSE	ko00040,ko00052,ko00053,ko00240,ko00500,ko00520,ko00561,ko00908,ko01100,ko01110
pme2960	C15H12O5	Naringenin chalcone	Flavonoids	849350	808370	831200	32007	30670	38367	27734	22209	23930	down	down	FALSE	ko00941,ko01100,ko01110
mws0044	C15H12O7	Dihydroquercetin(Taxifolin)	Flavonoids	9622300	9550100	9702300	228250	227550	245050	228440	255760	214040	down	down	FALSE	ko00941,ko01100,ko01110
Hmln002582	C23H22O12	Kaempferol-3-O-(6''-acetyl)-glucoside	Flavonoids	48537	65531	70545	28848	23177	19196	3988.1	5104.3	5185.8	down	down	down	--
Lmmp004326	C30H26O13	Kaempferol-7-O-β-D-(6''-O-(E)-p-coumaroyl)galactoside	Flavonoids	3131700	4160400	4196700	1239500	804560	867910	161970	176190	192730	down	down	down	--
Lmmp003217	C30H26O13	Kaempferol 3-O-β-d-(6''-O-(E)-p-coumaroyl) glucopyranoside	Flavonoids	3145000	4000700	4463700	1276300	810840	873910	175560	182360	204120	down	down	down	--
pmb3081	C6H11PO11	Glucarate O-Phosphoric acid	Others	7119800	10692000	7756000	3898900	4665400	4087400	719950	684630	1054600	down	down	down	--
mws0024	C7H6O5	Gallic acid	Tannins	15579000	14489000	15763000	3034600	2873300	3041000	3588100	3539300	3565100	down	down	FALSE	--
pme0309	C8H8O5	Methyl gallate	Tannins	14193000	12478000	13363000	902990	816800	913960	874340	777110	857900	down	down	FALSE	--
Cmhn001271	C27H22O18	Gemin D	Tannins	1436000	1453500	1436800	602220	625970	661160	507330	480960	633260	down	down	FALSE	--
HmLn001743	C27H24O18	1,3,6-Tri-O-galloyl-β-glucopyranoside	Tannins	711040	806390	864370	340300	377670	396270	190840	169430	204320	down	down	FALSE	--
Lmsn002071	C34H26O22	Tellimagrandin I	Tannins	2182900	2363100	2471100	665170	795340	791600	427480	469770	363610	down	down	FALSE	--
HmdP001587	C34H26O22	Tercatain	Tannins	2438000	2003000	2909800	754310	815040	932960	399460	467990	424400	down	down	FALSE	--
pmn001519	C15H12O9	Galloyl Methyl gallate	Tannins	6101800	5265400	5853100	324400	399610	392940	101890	91637	115540	down	down	down	--
Lmfn001209	C27H24O18	1,3,6-Tri-O-galloyl-D-glucose	Tannins	485350	392740	382010	93674	127260	90501	42441	51574	43254	down	down	down	--
Cmhn002244	C41H26O26	Glansrin C	Tannins	104020	106810	121070	32641	28032	22716	6766	7417.3	4581.2	down	down	down	--
Cmhn002124	C41H26O26	Praecoxin D	Tannins	95681	130790	130910	30110	21582	21551	4035.3	3690	3136.4	down	down	down	--
Lmlp006927	C35H36N4O5	2-[4-(2-{[3-(2-Amino-2-oxoethyl)-5-methoxy-2-methyl-1H-indol-1-yl]methyl } phenoxy)butoxy]-N-(pyridin-3-yl)benzamide	Alkaloids	1473400	1245900	1299300	427220	483120	513070	68473	66121	69873	down	down	down	--
pmn001506	C36H58O8	Oleanolic acid 2-O-β-D-glucopyranoside	Terpenoids	6126.5	5721	6712.3	2465.2	1820.5	1612.1	1696.5	1056.2	1023	down	down	FALSE	--
Lmmn004145	C38H60O10	3-O-(2-O-Acetyl-β-D-glucopyranosyl) oleanolic acid	Terpenoids	1871500	1772300	1831100	276840	282980	319920	254780	267230	261960	down	down	FALSE	--
pme1975	C3H4O4	Malonic acid	Organic acids	1497200	1554300	1573000	371760	447690	392320	264390	237310	213490	down	down	FALSE	--
pme0295	C6H11NO3	4-Acetamidobutyric acid	Organic acids	658750	513830	556150	54117	57221	47686	79593	78518	74003	down	down	FALSE	ko00330,ko01100
mws2125	C3H4KO6P	Phosphoenolpyruvic acid	Organic acids	258950	275090	226330	73186	82795	86532	63167	60457	63425	down	down	FALSE	--
mws0154	C7H10O5	Shikimic acid	Organic acids	22675000	19337000	20324000	4253700	4042800	4219800	644530	699840	663240	down	down	down	ko00400,ko01100,ko01110,ko01230
mws1436	C18H38O2	1,18-Octadecanediol	Lipids	9831.9	9139.9	9387.3	9	9	9	9	9	9	down	down	FALSE	--
pmn001686	C16H32O4	10,16-Dihydroxy-palmitic acid	Lipids	9744.5	8465.6	11108	3950.9	3689.6	3461.6	4012.7	4355.2	3894.6	down	down	FALSE	--
pmb0885	C18H26O3	4-oxo-9Z,11Z,13E,15E-octadecatetraenoic acid	Lipids	10523	11759	11514	2894.8	3466.3	3119	3210.5	2022.5	2677.6	down	down	FALSE	--
pmn001688	C18H32O3	9S-Hyroxy-10E,12E-octadecadienoic acid	Lipids	113050	104770	126870	50397	40071	34391	54838	53074	57933	down	down	FALSE	--
pmb2778	C18H32O3	9,10-EODE	Lipids	280240	271060	303370	92669	86686	77372	115310	123340	128780	down	down	FALSE	--
pmb2804	C18H32O4	13-HPODE	Lipids	49753	44484	52922	12199	10860	9656	9080.9	7124.2	7923.8	down	down	FALSE	ko00591,ko01100
pmn001694	C18H34O5	9,10,13-Trihyroxy-11-octadecadienoic acid	Lipids	226390	209390	225670	70440	61428	73303	89440	87548	88576	down	down	FALSE	--
Lmhp112042	C21H38O4	1-Linoleoylglycerol	Lipids	198430	175810	196040	78905	75471	69584	38012	40832	44503	down	down	FALSE	--
Lmhp009526	C27H46O9	2-γ-Linolenoyl-glycerol-glucoside	Lipids	305050	278150	308130	33589	42333	47225	42388	43192	33891	down	down	FALSE	--
Lmhp009773	C27H46O9	1-α-Linolenoyl-glycerol-glucoside	Lipids	30280	38444	38622	9252.5	7568.2	7207.8	11094	11601	11288	down	down	FALSE	--
Lmhp007840	C27H52NO7P	LysoPC 19:2	Lipids	12170	12088	12588	4634.5	4161.8	5976.3	5035	6130.6	6873.9	down	down	FALSE	--
Lmhp008744	C33H56O14	1-α-Linolenoyl-glycerol-diglucoside	Lipids	10117	10893	12168	3059.1	2570	4133.8	2009.8	2744.8	1450.4	down	down	FALSE	--
Lmhp008513	C33H56O14	2-γ-Linolenoyl-glycerol-diglucoside	Lipids	240840	187360	230980	28039	29680	44376	26895	38752	37003	down	down	FALSE	--
Lmhp009190	C33H58O14	2-Linoleoylglycerol-diglucoside	Lipids	16478	20104	10881	3339.7	3559.4	2723.2	3736	5152.5	3777.4	down	down	FALSE	--
pmb0149	C21H34O4	MAG(18:4)isomer1	Lipids	33503	23073	29929	5331.3	5732.3	8608.1	9	9	9	down	down	down	--
pmb0164	C21H38O4	MAG(18:2)isomer1	Lipids	41831	43928	44624	7854.9	7803.6	8416.9	9	9	9	down	down	down	--
(B) The list of characteristic metabolites identified in Rr5-60
Index	Formula	Compounds	Class I	Peak area									Rr5-30_vs_Rr5-60	Rr5-30_vs_Rr5-90	Rr5-60_vs_Rr5-90	kegg_map
				Rr5-30-1	Rr5-30-2	Rr5-30-3	Rr5-60-1	Rr5-60-2	Rr5-60-3	Rr5-90-1	Rr5-90-2	Rr5-90-3
mws0221	C6H12N2O4S2	L-(-)-Cystine	Amino acids and derivatives	27156	16344	19313	64653	78840	82234	27204	28252	28850	up	FALSE	down	ko00270,ko01100,ko02010
mws5037	C9H18N2O3	Alanylleucine	Amino acids and derivatives	111260	105420	129540	520520	473420	444010	244560	219440	249240	up	up	down	--
Lmyp003348	C28H24O15	Kampferol 3-O-(6″-galloyl)-β-D-galactopyranoside	Flavonoids	98548	119030	141500	429810	336980	413270	117130	155950	154660	up	FALSE	down	--
Lmyp003139	C28H24O16	Quercetin 3-O-(6′′-galloyl)-β-D-galactopyranoside	Flavonoids	468000	542420	540760	2248300	1900900	2293800	591180	707560	593410	up	FALSE	down	--
Lmmp002068	C45H38O19	Gallocatechin-catechin-catechin	Tannins	36566	37451	37064	112870	100360	126210	29795	32474	32380	up	FALSE	down	--
mws0120	C8H20NO6P	Choline alfoscerate	Lipids	1184800	1029900	845430	2280600	2980500	2852000	1156900	1028400	920320	up	FALSE	down	ko00564,ko00565
(C) The list of characteristic metabolites identified in Rr5-90
Index	Formula	Compounds	Class I	Peak area									Rr5-30_vs_Rr5-60	Rr5-30_vs_Rr5-90	Rr5-60_vs_Rr5-90	kegg_map
				Rr5-30-1	Rr5-30-2	Rr5-30-3	Rr5-60-1	Rr5-60-2	Rr5-60-3	Rr5-90-1	Rr5-90-2	Rr5-90-3
pme0120	C5H11NO2	5-Aminovaleric acid	Amino acids and derivatives	26732	21419	27854	93830	95766	85815	208070	168700	189690	up	up	up	ko00310,ko00330,ko01100
pme1210	C5H11NO2S	L-Methionine	Amino acids and derivatives	16175	51154	60539	363290	328780	411520	2924200	2839600	2294200	up	up	up	ko00270,ko00966,ko00970,ko01100,ko01110,ko01210,ko01230
pme2914	C6H10O5	3-Hydroxy-3-methylpentane-1,5-dioic acid	Amino acids and derivatives	9	9	9	1792800	1968400	1817200	24915000	26653000	26992000	up	up	up	--
pmb2561	C7H13NO3S	N-Acetylmethionine	Amino acids and derivatives	9	9	9	23514	17893	25229	60399	62768	57261	up	up	up	--
pmb0034	C10H16N2O7	Glu-Glu	Amino acids and derivatives	9	9	9	24087	27614	28205	127530	130510	123910	up	up	up	--
pmb2855	C11H20N2O8	L-Glutamine O-hexside	Amino acids and derivatives	2454.2	2428	1787.6	4791.2	5771	6835.3	13168	12233	14605	up	up	up	--
mws0582	C11H19N3O6S	S-(methyl)glutathione	Amino acids and derivatives	10906	15580	13488	36430	55656	64891	269820	262420	243850	up	up	up	--
mws0256	C5H11NO2	L-Valine	Amino acids and derivatives	3186400	2803500	3252600	2898300	2926200	2853100	7317400	6730600	6818200	FALSE	up	up	ko00280,ko00290,ko00311,ko00460,ko00770,ko00966,ko00970,ko01100,ko01110,ko01210,ko01230,ko02010
mws1587	C6H13NO2	α-Aminocaproic acid	Amino acids and derivatives	1172400	956200	1044800	1081300	1093900	1186800	3249000	2813100	2653700	FALSE	up	up	--
pme1002	C8H11NO	L-Tyramine	Amino acids and derivatives	4430.6	3452.5	3051.5	4926.8	5447	6651.8	18503	16200	20749	FALSE	up	up	ko00350,ko00950,ko01100,ko01110
pme0026	C6H14N2O2	L-(+)-Lysine	Amino acids and derivatives	832950	885450	809970	693750	700720	723150	4564100	4391600	4755100	FALSE	up	up	ko00300,ko00310,ko00780,ko00960,ko00970,ko01100,ko01110,ko01210,ko01230,ko02010
mws0254	C6H9N3O2	L-Histidine	Amino acids and derivatives	96291	104680	87411	60715	51111	56720	350470	306860	297620	FALSE	up	up	ko00340,ko00410,ko00970,ko01100,ko01110,ko01230,ko02010
pme0124	C7H12N2O3	Glycyl-L-proline	Amino acids and derivatives	23308	26619	20727	19552	20039	17122	54100	52016	51001	FALSE	up	up	--
mws0250	C9H11NO3	L-(-)-Tyrosine	Amino acids and derivatives	10500000	8099400	9207800	9098300	8861900	9948400	27295000	22493000	21324000	FALSE	up	up	ko00130,ko00261,ko00350,ko00360,ko00400,ko00460,ko00730,ko00940,ko00950,ko00965,ko00966,ko00970,ko00998,ko01100,ko01110,ko01210,ko01230
pme3388	C7H16N4O2	H-HomoArg-OH	Amino acids and derivatives	33703	36095	43410	34394	42484	36704	165790	145010	157180	FALSE	up	up	--
mws5042	C11H14N2O3	Glycylphenylalanine	Amino acids and derivatives	38270	36675	36692	46707	55208	55272	203120	183910	174530	FALSE	up	up	--
pme2890	C8H16N2O4S2	L-Homocystine	Amino acids and derivatives	4506.8	7036.1	6661.6	7889.8	7792	7443.3	16213	17617	16144	FALSE	up	up	ko00270
mws0636	C18H20N2O3	Phe-Phe	Amino acids and derivatives	2438.8	3368.6	2443.4	2861.6	2216.7	2965.6	8536.1	10462	7712.4	FALSE	up	up	--
pme1286	C14H20N6O5S	S-(5'-Adenosy)-L-homocysteine	Amino acids and derivatives	8430.5	17074	19173	28955	32975	28489	122210	95174	96451	FALSE	up	up	ko00270,ko01100,ko01230
pmb0464	C16H27NO14	Aspartic acid di-O-glucoside	Amino acids and derivatives	121620	113710	129480	157440	149620	158680	1288200	1212300	1126700	FALSE	up	up	--
mws0260	C6H14N4O2	L-(+)-Arginine	Amino acids and derivatives	3805200	3050500	3808000	1715200	1663700	1726500	14969000	13353000	12558000	down	up	up	ko00220,ko00261,ko00330,ko00472,ko00970,ko01100,ko01110,ko01230,ko02010
Hmtn001120	C14H20O8	5-(2-Hydroxyethyl)-2-O-glucosylohenol	Phenolic acids	75133	71941	81933	410290	378150	412680	1410800	1342000	1340600	up	up	up	--
pmn001420	C15H18O9	1-O-[(E)-Caffeoyl]-β-D-glucopyranose	Phenolic acids	181100	183850	183550	590810	506150	444160	2346800	2849700	3185900	up	up	up	--
pme0085	C18H16O8	Rosmarinic acid	Phenolic acids	17470	19721	22799	63209	57311	65640	136940	139890	147190	up	up	up	ko00350,ko01100
pmb2940	C17H22O10	1-O-β-D-Glucopyranosyl sinapate	Phenolic acids	26648	34322	39708	328540	303240	338130	1580700	1902800	1707800	up	up	up	--
pmn001738	C17H24O11	Oleoside 11-methyl ester	Phenolic acids	9	9	9	38586	38545	29999	111030	97011	94002	up	up	up	--
pmb2936	C28H32O14	Disinapoyl hexoside	Phenolic acids	1449.8	1713	2704.3	5734.7	5654.9	7682.2	64634	68723	65529	up	up	up	--
pmb2819	C27H38O19	O-Caffeoyl maltotriose	Phenolic acids	9	9	9	18007	23741	18980	88282	75349	99474	up	up	up	--
pme3083	C8H7NO3	2-(Formylamino)benzoic acid	Phenolic acids	22766	24846	31232	23280	17234	17945	112800	104690	99368	FALSE	up	up	ko00380,ko01100
pme3255	C11H14O2	Methyleugenol	Phenolic acids	9	9	9	9	9	9	14910	23062	20923	FALSE	up	up	ko00940
mws2212	C9H8O4	Caffeic acid	Phenolic acids	32464	41350	40761	68134	105750	43148	195740	237490	211950	FALSE	up	up	ko00940,ko01100,ko01110
mws0014	C10H10O4	Ferulic acid	Phenolic acids	28809	32120	26917	24888	17059	24454	122410	114920	118050	FALSE	up	up	ko00940,ko01100,ko01110
mws0853	C11H14O4	Sinapyl alcohol	Phenolic acids	7627.2	16374	12931	22280	15258	20242	90898	78631	69932	FALSE	up	up	ko00940,ko01100,ko01110
Zmhn001926	C13H16O8	Salicylic acid O-glycoside	Phenolic acids	611240	602910	674590	823560	832870	763930	4924700	4596700	4312400	FALSE	up	up	--
pmn001367	C13H16O9	Protocatechuic acid-4-glucoside	Phenolic acids	1306600	1263700	1373800	1705800	1635700	1659700	4473300	4699500	4818600	FALSE	up	up	--
pmb2871	C13H16O9	2,5-Dihydroxy benzoic acid O-hexside	Phenolic acids	1181800	1262100	1271800	1569400	1561200	1412100	4309000	4311300	4265500	FALSE	up	up	--
mws0178	C16H18O9	Chlorogenic acid	Phenolic acids	176090	176590	170390	168020	160830	145470	406270	449630	453370	FALSE	up	up	ko00940,ko00941,ko00945,ko01110
pme1816	C16H18O9	Neochlorogenic acid(5-O-Caffeoylquinic acid)	Phenolic acids	206860	213690	229550	190620	232220	193220	495260	493840	565330	FALSE	up	up	--
mad1424	C17H14O13	Ditartaroyl-hydroxylcoumarin	Phenolic acids	141180	128980	115320	207020	230860	201350	525390	539350	632270	FALSE	up	up	--
Lmhn002574	C20H16O11	Caffeoylp-Hydroxybenzoyltartaric acid	Phenolic acids	8683	11263	5940.5	8909	4736.8	10935	28431	28450	27574	FALSE	up	up	--
pmb2654	C19H27NO12	Anthranilate O-hexosyl-O-hexoside	Phenolic acids	45499	38340	51731	70574	64620	73112	327800	239000	233590	FALSE	up	up	--
mad2400	C23H20O11	p-Coumaroylferuloyltartaric acid	Phenolic acids	54340	55228	61589	38601	31637	41529	197540	200060	218240	FALSE	up	up	--
pmb3061	C22H28O13	5-O-p-Coumaroyl quinic acid O-hexoside	Phenolic acids	13111	17817	12919	15953	12414	10878	58032	59122	48560	FALSE	up	up	--
mad2394	C24H22O12	Sinapoyl-p-coumaroyltartaric acid	Phenolic acids	19996	19803	24548	37783	36908	31596	96031	106540	96735	FALSE	up	up	--
Lmhn003799	C24H22O12	Feruloylferuloyltartaric acid	Phenolic acids	5032.6	5513.7	5712.8	4916.1	3153.8	3998	39070	33029	38449	FALSE	up	up	--
Lmhn003801	C25H24O13	Feruloylsinapoyltartaric acid	Phenolic acids	2592.3	2744.4	4009.6	5632.2	6397.3	5140	49063	48994	47340	FALSE	up	up	--
pmn001622	C27H22O18	Hexahydroxydiphenoyl galloylglucose	Phenolic acids	9	9	9	9	9	9	1005000	1287800	1370800	FALSE	up	up	--
mws2213	C9H8O2	Cinnamic acid	Phenolic acids	1412.7	989	1808	496.1	445.08	610.57	16042	15793	11902	down	up	up	ko00130,ko00360,ko00940,ko00998,ko01100,ko01110
pme1436	C9H8O3	p-Coumaric acid	Phenolic acids	235990	176930	182860	63322	68605	79439	894120	910550	913020	down	up	up	ko00130,ko00350,ko00940,ko00950,ko00998,ko01100,ko01110
mws0251	C5H6N2O2	Thymine	Nucleotides and derivatives	9	9	9	42998	36764	50329	121070	106440	103540	up	up	up	ko00240,ko01100
pme1173	C5H4N4O	Allopurinol	Nucleotides and derivatives	9	9	9	4424.7	5392.4	4351.2	24569	20328	19983	up	up	up	--
pme2060	C10H13N5	N6-Isopentenyladenine	Nucleotides and derivatives	3935.2	2839.5	3141.5	136180	132890	137980	1614700	1598100	1598500	up	up	up	ko00908,ko01110,ko04075
mws1060	C10H12N4O5	9-(β-D-Arabinofuranosyl)hypoxanthine	Nucleotides and derivatives	18523	17477	14238	38587	34773	37771	150350	184300	166700	up	up	up	--
mws0668	C10H12N4O6	Xanthosine	Nucleotides and derivatives	98707	94546	94003	398690	421160	383420	1356500	1298200	1401200	up	up	up	ko00230,ko00232,ko01100,ko01110,ko02010
pmb0197	C11H15N5O5	N2-methylguanosine	Nucleotides and derivatives	18909	13089	15772	46632	56039	52083	115100	106180	102470	up	up	up	--
pme2746	C27H33N9O15P2	Flavin adenine dinucleotide(FAD)	Nucleotides and derivatives	6904.8	6887.2	5713	12533	20021	14217	44055	55575	50757	up	up	up	ko00740,ko01100,ko01110
pme3961	C10H13N5O3	Deoxyadenosine	Nucleotides and derivatives	118300	111690	127910	179020	188570	174040	406980	385870	402170	FALSE	up	up	ko00230,ko01100,ko02010
pme0230	C10H13N5O4	Adenosine	Nucleotides and derivatives	7631600	7453000	8148700	7801900	7638700	7769500	25168000	27004000	26042000	FALSE	up	up	ko00230,ko01100,ko02010
pme1178	C10H13N5O5	Guanosine	Nucleotides and derivatives	3707900	3566000	3612100	4333600	4092400	4364800	9284300	8736200	8717000	FALSE	up	up	ko00230,ko01100,ko02010
pme1474	C11H15N5O3S	5'-Deoxy-5'-(methylthio)adenosine	Nucleotides and derivatives	2472500	3087800	3253000	2625600	2388100	2579100	7790100	7468700	8749300	FALSE	up	up	ko00270,ko00908,ko01100
pme3967	C12H17N5O5	2-(Dimethylamino)guanosine	Nucleotides and derivatives	239340	251800	255350	200970	201670	188570	745980	719440	791390	FALSE	up	up	--
mws0884	C10H12N5O6P	Cyclic AMP	Nucleotides and derivatives	4937	4513.8	3289.8	4442.6	2925.8	4764.2	14533	16088	16027	FALSE	up	up	ko00230,ko01100
pmb0998	C10H14N5O8P	Guanosine 5'-monophosphate	Nucleotides and derivatives	18415	13439	19881	17881	11352	17634	44948	37486	44157	FALSE	up	up	ko00230,ko01100
pme2651	C21H28N7O17P3	NADP (Nicotinamide adenine dinucleotide phosphate)	Nucleotides and derivatives	66957	91927	74193	125830	119680	138870	264260	278980	250510	FALSE	up	up	ko00195,ko00480,ko00760,ko01100
pma0134	C4H8O4	D(-)-Threose	Others	16381	15746	12136	31989	30295	33124	54826	55443	91927	up	up	up	--
pmb0764	C6H9NOS	4-Methyl-5-thiazoleethanol	Others	7741.7	6041.4	8107.3	165540	159750	173850	360550	358500	363880	up	up	up	ko00730,ko01100
pmn001424	C24H38O12	(6S,7E,9R)-6,9-Dihydroxy-4,7-megastigmadin-3-one-9-O-D-xylopyranosyl(1-6)-glucopyranoside	Others	9	9	9	10690	14843	17245	52867	47159	26520	up	up	up	--
mws0232	C17H20N4O6	Riboflavin	Others	26396	26411	29103	27492	22056	25639	75026	75115	73671	FALSE	up	up	ko00740,ko01100,ko01110,ko02010
pmp001014	C20H20O10	1-Glycosyloxy-2-hydroxy-4-methoxy-xanthone	Others	9	9	9	9	9	9	829430	650500	600210	FALSE	up	up	--
mws1589	C18H32O16	Panose	Others	16751	12977	11484	16771	15516	21060	187540	186490	152090	FALSE	up	up	--
pme0500	C18H32O16	D-(+)-Melezitose	Others	10829	6445.1	4312.9	14551	15965	12063	97504	63156	75432	FALSE	up	up	--
pme2125	C18H32O16	Raffinose	Others	30734	24467	22213	25433	21303	22772	380420	406770	348840	FALSE	up	up	--
pmp001282	C28H50NO7P	Propyl2-(trimethylammonio)ethyl phosphate	Others	117690	115590	128380	202540	233960	246590	2191200	2416800	2291400	FALSE	up	up	--
pmp000573	C22H22O10	Acacetin-7-O-galactoside	Flavonoids	9	9	9	7236.5	5340.6	6048.9	82256	61870	65911	up	up	up	--
pmp000575	C22H22O10	Tilianin(Acacetin-7-O-β-D-glucoside)	Flavonoids	9	9	9	8067.6	2477.5	2435.8	78174	60213	53545	up	up	up	--
pme3400	C22H22O10	Sissotrin	Flavonoids	9	9	9	6277.9	4041.3	3010.6	61386	54552	48014	up	up	up	ko00943
Hmln002402	C24H22O14	Kaempferol-3-O-(6''-malonyl)-galactoside	Flavonoids	18872	12751	14189	25051	32452	25375	628710	569210	570030	FALSE	up	up	--
pmb0382	C19H14O6	O-Feruloyl 4-hydroxylcoumarin	Lignans and Coumarins	14209	21568	23212	74495	48685	62532	161750	185020	218580	up	up	up	--
Wmhn004487	C20H16O14	Ellagyl glucose	Tannins	15776	14542	32558	38693	35568	45038	100680	86578	98324	FALSE	up	up	--
Hmln002480	C27H22O18	Galloyl-HHDP(Hexahydroxydiphenoyl)-glueopy ranose	Tannins	152320	98176	117350	147420	133160	106260	907570	968370	1025800	FALSE	up	up	--
Lmlp001118	C23H29NO8	3'-Glucosyl-6,7-dihydroxy-N-methyl-benzyltetrahydroisoquinoline	Alkaloids	9	9	9	496160	498540	529200	1970800	1995600	2050600	up	up	up	--
pmp001280	C23H46NO7P	3-{[(2-Aminoethoxy)(hydroxy)phosphoryl]oxy}-2-hydroxypropyl-9,12-octadecenoate	Alkaloids	124770	111220	137400	324020	314810	331890	905660	957730	979490	up	up	up	--
pmb0374	C5H5N5	Aminopurine	Alkaloids	6458	7018.1	7394.5	7858.4	7829.1	8855.5	39385	39684	32413	FALSE	up	up	--
pmb2211	C19H38N2O3	Cocamidopropyl betaine	Alkaloids	15508	14496	17901	19590	17512	11744	60354	42377	48294	FALSE	up	up	--
pmp001279	C21H48N3O9P	Bis(N,N-diethylethanaminium)-2-acetamido-1,5-anhydro-2-deoxy-1-[-hydroxy(phosphonato)methyl]-D-glucitol	Alkaloids	793680	739860	783440	967040	979980	1017200	3008700	3024200	2958800	FALSE	up	up	--
pmn001426	C30H48O5	Euscaphic acid	Terpenoids	30075	29659	34750	74536	73521	81262	229320	227700	225910	up	up	up	--
Hmln003605	C30H48O6	Myrianthic acid	Terpenoids	9	9	9	91685	80098	83150	1037700	1077800	1089100	up	up	up	--
pmn001704	C30H46O4	2,3-Dihydroxy 5(6),12(13)diene ursolic acid	Terpenoids	1752.3	1323.2	2032.5	2034.4	1469.7	838.93	4482.6	4202.2	4432.6	FALSE	up	up	--
pmp000266	C30H48O4	3β,19α-Dihydroxyolean-12-en-28-oic acid	Terpenoids	52134	43953	47839	57673	58125	57238	158200	154610	194940	FALSE	up	up	--
pmp000268	C30H46O5	Rosamultic acid	Terpenoids	5015100	5089300	4856100	6221800	5608700	6052400	22849000	19270000	23883000	FALSE	up	up	--
Wmhn009757	C30H48O5	2α,3β,23-trihydroxy-12-ene-28-ursolic acid	Terpenoids	5112200	4618100	5098500	5278800	4978900	5282000	30419000	30642000	31460000	FALSE	up	up	--
pmp000780	C40H56O8	3-O-Trans-feruloyl euscaphic acid	Terpenoids	478020	449780	439280	898700	960360	845880	1842500	2051300	1993000	FALSE	up	up	--
pmp000271	C30H48O6	1β,2α,3α,19α-Tetrahydroxyurs-12-en-28-oic acid	Terpenoids	1418800	1292800	1416200	600750	587870	841200	5589000	6335700	6410200	down	up	up	--
mws0576	C4H8O3	3-Hydroxybutyrate	Organic acids	9	9	9	226370	179350	192940	508960	503310	487320	up	up	up	--
mws0177	C5H4O3	2-Furanoic acid	Organic acids	9	9	9	22209	15904	16355	63324	55776	42598	up	up	up	--
pme3011	C4H9NO2	γ-Aminobutyric acid	Organic acids	690440	697380	678640	877660	829070	805890	1891200	1740400	1686300	FALSE	up	up	ko00250,ko00330,ko00410,ko00650,ko00760,ko01100
mws0341	C6H12O3	(S)-(-)-2-Hydroxyisocaproic acid	Organic acids	35636	34111	36280	60314	68300	66414	157160	152270	157010	FALSE	up	up	--
mws0208	C6H10O4	Adipic Acid	Organic acids	196670	156210	202770	143820	145440	143210	845380	832830	881780	FALSE	up	up	ko01100
Lmhp008337	C19H40NO7P	LysoPE 14:0(2n isomer)	Lipids	9	9	9	2515.7	2544.7	2616	16772	17051	17530	up	up	up	--
pmb0862	C20H42NO7P	LysoPC 12:0	Lipids	2748.4	2283.5	2517.7	35445	34976	33983	114300	122120	118920	up	up	up	--
Lmhp009034	C21H42NO7P	LysoPE 16:1	Lipids	3333.1	2100	3933.5	10660	16710	14434	98735	183330	163170	up	up	up	--
Lmhp008763	C21H42NO7P	LysoPE 16:1(2n isomer)	Lipids	22654	25133	20495	53373	64706	63042	313130	337170	297900	up	up	up	--
Lmhp009769	C22H44NO7P	LysoPE 17:1	Lipids	11103	7237.3	10108	19805	19831	20918	60670	46320	56845	up	up	up	--
mws0289	C23H46NO7P	LysoPE 18:1	Lipids	142630	134320	127530	313150	307710	293120	858620	1016700	1028600	up	up	up	--
pmb2260	C23H46NO7P	LysoPC 15:1	Lipids	12433	11497	9734.6	32132	30492	38551	75517	84961	69847	up	up	up	--
pma1303	C24H46NO7P	LysoPC 16:2	Lipids	9	9	9	7284.4	8497.8	6560	19584	16498	11586	up	up	up	--
pmp001270	C24H48NO7P	LysoPC 16:1	Lipids	9	9	9	38840	33533	60677	241740	368620	354890	up	up	up	--
pmp001281	C26H52NO7P	LysoPC 18:1	Lipids	1242400	1175300	1337700	2540600	2573500	2675100	9760700	10074000	9788100	up	up	up	--
mws2623	C18H34O2	11-Octadecanoic acid(Vaccenic acid)	Lipids	1700500	1726900	1771800	2512000	2976500	3227500	6822600	5217900	5754300	FALSE	up	up	--
mws0396	C18H34O2	Elaidic Acid	Lipids	5353300	5302900	4615500	6783700	8885000	10328000	20401000	16271000	17908000	FALSE	up	up	--
Lmhp008885	C20H42NO7P	LysoPE 15:0(2n isomer)	Lipids	9	9	9	9	9	9	8634.2	15817	13744	FALSE	up	up	--
Lmhp009464	C22H44NO7P	LysoPE 17:1(2n isomer)	Lipids	39614	34122	43994	54796	60328	60278	136230	136890	126580	FALSE	up	up	--
pmd0130	C22H46NO7P	LysoPC 14:0(2n isomer)	Lipids	9133.4	8445.6	12764	14531	13225	16688	35230	39806	36743	FALSE	up	up	--
pmb0883	C23H48NO7P	LysoPE 18:0	Lipids	106150	95246	97620	112220	108570	109550	263790	252210	256790	FALSE	up	up	--
pmd0132	C24H50NO7P	LysoPC 16:0(2n isomer)	Lipids	447660	448220	487520	304180	318790	352200	1032700	1077600	1116200	FALSE	up	up	--
pmb0855	C24H50NO7P	LysoPC 16:0	Lipids	8343100	8203600	8778800	11090000	10897000	11208000	24032000	23577000	23686000	FALSE	up	up	--
pmb0854	C26H48NO7P	LysoPC 18:3	Lipids	863420	858920	950420	1110800	986560	1052600	2419700	2716300	2529900	FALSE	up	up	--
mws0126	C26H54NO7P	LysoPC 18:0	Lipids	1003700	1038500	1069600	833370	810770	836700	2463000	2334800	2345100	FALSE	up	up	--
pmb2228	C27H56NO7P	LysoPC 19:0	Lipids	4692.1	3097.4	4475.9	3247.7	2741.4	2789.4	17319	17401	18956	FALSE	up	up	--
Lmhp011549	C28H56NO7P	LysoPC 20:1	Lipids	9528.4	8240.2	9923	15245	17391	16509	36606	40310	34647	FALSE	up	up	--

## Sheet: Table S3
Table S3. List of DEGs identified in amino acid, phenolic acid, and flavonol derivatives. (A) Flavonoid pathway; (B) Polyphenols; (C) Amino acids.
(A)
enzyme	geneID	Rr5-30-1	Rr5-30-2	Rr5-30-3	Rr5-60-1	Rr5-60-2	Rr5-60-3	Rr5-90-1	Rr5-90-2	Rr5-90-3	Rr-30 VS Rr-60	Rr-60 VS Rr-90	Rr-60 VS Rr-90
CHS	evm.model.Contig324.104	280.677	288.466	279.614	21.083	21.384	21.79	86.652	82.832	75.815	down	up	down
	evm.model.Contig324.107	181.529	190.739	175.344	15.457	14.901	14.628	84.725	79.743	70.266	down	up	down
	evm.model.Contig324.105	13.469	12.753	12.981	0.419	0.36	0.457	3.892	3.672	3.042	down	up	down
	evm.model.Contig110.47	34.777	37.02	35.725	18.096	17.415	17.196	14.976	14.923	14.236	insig	insig	down
HCT	evm.model.Contig4.33	177.45	186.779	180.103	43.056	40.834	41.199	4.981	4.898	5.608	down	down	down
	evm.model.Contig280.68	55.728	55.316	54.71	25.758	29.042	29.465	24.674	24.037	22.866	insig	insig	down
C3'H	evm.model.Contig374.36	66.402	72.778	66.8	9.882	10.296	11.288	7.62	7.052	6.829	down	insig	down
CHI	evm.model.Contig317.48	376.111	372.794	374.514	92.342	86.313	80.981	113.078	111.103	98.884	down	insig	down
	evm.model.Contig319.126	123.542	125.548	120.848	36.706	38.542	38.923	53.486	54.347	46.916	down	insig	dowm
F3H	evm.model.Contig281.218	10.655	11.612	10.502	6.567	6.286	5.995	5.356	4.588	5.348	insig	insig	down
F3'H	evm.model.Contig418.464	205.059	219.8	197.433	43.382	45.923	44.122	57.615	60.157	57.651	down	insig	down
	evm.model.Contig401.234	3.623	3.197	3.208	2.639	2.689	2.36	0.93	0.885	0.857	insig	insig	down
(B)
enzyme	geneID	Rr5-30-1	Rr5-30-2	Rr5-30-3	Rr5-60-1	Rr5-60-2	Rr5-60-3	Rr5-90-1	Rr5-90-2	Rr5-90-3	Rr-30 VS Rr-60	Rr-60 VS Rr-90	Rr-60 VS Rr-90
PAL	evm.model.Contig191.105	83.683	83.05	85.416	14.401	15.024	17.099	21.443	22.903	20.404	down	insig	down
	evm.model.Contig191.106	80.966	84.973	84.918	16.31	13.775	20.286	30.575	26.382	26.204	down	insig	down
C4H	evm.model.Contig308.202	256.827	263.073	253.225	43.495	50.163	51.044	74.843	71.737	63.137	down	insig	down
4CL	evm.model.Contig386.40	63.811	66.324	63.839	5.462	7.133	6.272	11.444	11.43	10.09	down	insig	down
	evm.model.Contig21.6	108.201	109.431	112.354	27.036	31.33	35.426	24.896	24.749	24.157	down	insig	down
	evm.model.Contig428.373	4.601	5.935	5.812	16.586	16.77	15.967	32.724	35.348	32.115	up	up	up
COMT	evm.model.Contig386.133	296.315	306.816	296.732	143.64	144.251	153.084	126.831	128.476	124.432	down	insig	down
	evm.model.Contig179.433	8.202	6.986	7.003	2.179	1.86	1.936	14.539	13.385	16.069	down	up	up
	evm.model.Contig281.153	24.796	22.988	25.623	16.551	16.913	16.582	7.836	7.67	7.063	insig	down	down
	evm.model.Contig289.255	48.152	54.445	46.742	16.768	15.986	19.977	16.613	16.457	16.416	down	insig	down
(C)
enzyme	geneID	Rr5-30-1	Rr5-30-2	Rr5-30-3	Rr5-60-1	Rr5-60-2	Rr5-60-3	Rr5-90-1	Rr5-90-2	Rr5-90-3	Rr-30 VS Rr-60	Rr-60 VS Rr-90	Rr-60 VS Rr-90
GPT	evm.model.Contig339.70	29.961	32.557	32.594	36.927	39.253	41.513	98.068	91.13	95.404	insig	up	up
	evm.model.Contig92.367	160.562	154.749	157.512	56.211	55.867	56.417	37.664	34.978	35.481	dowm	insig	down
GLT1	evm.model.Contig386.230	78.338	79.738	79.797	27.882	24.178	25.911	36.942	35.477	34.786	down	insig	down
NAGS	evm.model.Contig273.43	120.326	116.289	123.613	56.148	54.803	54.118	53.91	55.518	55.249	down	insig	down
ArgC	evm.model.Contig332.117	11.662	11.719	11.458	11.864	11.9	12.799	70.976	68.049	69.93	insig	up	up
ArgD	evm.model.Contig280.133	31.858	35.127	33.248	98.644	102.684	100.437	80.06	80.29	77.847	up	insig	up
ACY1	evm.model.Contig290.142	69.971	73.35	66.38	91.946	93.166	93.234	142.753	142.311	144.13	insig	insig	up
	evm.model.Contig281.196	29.017	30.947	31.078	67.308	71.179	73.012	58.872	60.34	61.886	up	insig	up
OTC	evm.model.Contig120.291	17.67	19.335	18.894	36.131	35.104	35.776	36.628	38.859	37.032	insig	insig	up
argG	evm.model.Contig104.465	8.161	9.043	8.068	2.156	2.002	1.915	2.556	2.341	2.056	down	insig	down
ProB	evm.model.Contig317.286	67.542	74.399	70.206	32.191	36.663	33.699	35.295	38.692	32.471	down	insig	down
	evm.model.Contig179.808	2.221	1.851	2.217	0.453	0.531	0.285	0.237	0.25	0.165	down	insig	down
ODC1	evm.model.Contig40.356	537.433	537.878	535.703	170.817	171.549	160.194	25.064	27.318	25.469	down	insig	down
ALDH	evm.model.Contig68.427	109.479	107.872	108.681	173.02	170.329	167.309	198.094	203.591	200.112	insig	insig	up
	evm.model.Contig68.59	122.215	124.256	120.029	120.458	131.492	125.08	229.965	246.961	261.136	insig	insig	up
PutB	evm.model.Contig194.133	25.662	24.351	26.739	165.269	165.876	163.687	50.324	51.009	49.386	up	down	up
GAD	evm.model.Contig100.72	319.761	327.317	339.435	644.744	663.93	654.646	531.394	533.174	530.71	up	insig	insig
COT1	evm.model.Contig120.160	59.435	58.578	61.154	74.732	73.384	74.221	155.685	157.13	156.189	insig	up	up
	evm.model.Contig283.202	40.766	41.511	39.978	101.166	102.433	101.96	321.536	322.887	313.73	up	up	up
ASNB	evm.model.Contig247.176	171.777	166.246	169.882	38.655	37.848	37.331	15.595	16.796	16.014	down	down	down
asd	evm.model.Contig332.117	11.662	11.719	11.458	11.864	11.9	12.799	70.976	68.049	69.93	insig	up	up
thrC	evm.model.Contig264.74	27.26	29.213	26.692	18.834	18.216	20.167	14.989	13.811	14.925	insig	insig	down
metB	evm.model.Contig418.196	21.226	19.249	21.841	2.811	1.708	3.364	7.521	9.501	10.669	down	up	down
metC	evm.model.Contig243.89	34.861	35.732	31.293	56.238	59.805	57.281	63.604	65.246	65.919	insig	insig	up
BHMT	evm.model.Contig254.103	2.66	3.78	2.745	8.902	10.529	9.269	20.232	14.497	18.599	up	insig	up
	evm.model.Contig40.474	3.221	3.154	3.067	7.703	7.491	8.373	21.775	21.231	20.364	up	up	up
metK	evm.model.Contig380.76	218.653	224.146	216.692	173.532	176.85	181.257	102.043	107.279	105.523	insig	insig	down
DNMT1	evm.model.Contig238.233	2.626	2.352	2.705	0.736	0.499	0.62	0.032	0.06	0.03	down	down	down
	evm.model.Contig428.673	0.13	0.178	0.192	0.12	0.035	0.093	0.065	0.03	0.054	down	insig	down
	evm.model.Contig268.49	1.07	1.167	1.117	1.341	1.258	1.332	0.251	0.284	0.276	insig	down	down
	evm.model.Contig326.22	2.268	2.362	2.17	2.324	2.364	2.627	1.035	0.756	0.666	insig	down	down
	evm.model.Contig332.8	1.341	1.326	1.421	2.056	1.983	1.847	0.419	0.498	0.334	insig	down	down
ahcY	evm.model.Contig158.20	381.6	399.9	379.441	565.619	572.755	595.365	246.826	251.017	246.204	insig	down	insig
dapA	evm.model.Contig136.99	58.793	59.635	57.602	118.913	119.845	117.98	138.557	141.638	136.4	up	insig	up
dapE	evm.model.Contig290.142	69.971	73.35	66.38	91.946	93.166	93.234	142.753	142.311	144.13	insig	insig	up
	evm.model.Contig281.196	29.017	30.947	31.078	67.308	71.179	73.012	58.872	60.34	61.886	up	insig	up
dapF	evm.model.Contig179.678	52.254	53.891	50.043	43.2493	40.897	41.906	80.617	83.573	87.892	insig	up	insig
lysA	evm.model.Contig284.69	34.7103	31.0012	36.0012	3.41345	3.04869	3.5404	7.15462	6.39007	7.42069	down	up	down
ilvC	evm.model.Contig349.70	117.733	123.669	120.788	263.953	255.105	259.537	296.234	300.884	301.622	up	insig	up
ilvE	evm.model.Contig236.7	44.603	43.1	43.051	24.69	24.768	23.372	13.034	14.951	14.853	down	down	down
	evm.model.Contig352.46	2.227	2.239	2.324	1.245	1.197	1.153	7.736	6.655	7.274	up	up	up
serA	evm.model.Contig2.54	72.432	73.921	72.07	44.526	42.512	44.44	15.296	15.445	16.388	insig	up	down
serB	evm.model.Contig418.450	100.497	105.091	105.769	60.994	63.732	60.83	50.917	52.177	51.752	insig	insig	down
hisG	evm.model.Contig229.64	6.809	11.443	8.574	43.939	35.13	33.348	26.766	27.378	23.457	up	insig	up
	evm.model.Contig229.63	46.415	45.056	49.286	138.59	136.156	142.723	218.094	212.885	219.155	up	down	up
hisA	evm.model.Contig178.187	11.612	9.146	11.335	3.294	2.117	3.395	3.514	2.218	3.323	down	insig	down
aroK	evm.model.Contig239.78	276.481	268.642	277.549	59.172	57.825	59.425	47.104	47.882	50.174	down	insig	down
aroC	evm.model.Contig418.613	10.059	10.338	9.992	4.487	4.45	4.197	0.841	0.857	0.854	down	down	down
CM	evm.model.Contig120.124	77.497	79.512	82.39	41.936	50.139	42.531	13.007	12.982	14.518	insig	down	down
ADT	evm.model.Contig428.537	75.301	84.872	72.883	41.162	45.973	47.028	21.859	22.83	22.932	insig	down	down
TAT	evm.model.Contig236.6	24.921	26.264	25.995	107.792	101.889	103.18	113.564	116.016	116.347	up	insig	up
	evm.model.Contig389.26	0.515	0.407	0.567	1.417	0.602	0.773	1.749	2.272	1.543	insig	insig	up

## Sheet: Table S4
Table S4. Correlation between DEGs and characteristic metabolites in amino acid, phenolic acid, and flavonol derivatives. (A) Flavonoid pathway; (B) Polyphenols; (C) Amino acids.
(A)
enzyme	geneID	Chlorogenic acid	Naringenin chalcone	Dihydroquercetin(Taxifolin)
CHS	evm.model.Contig324.104	-0.247	0.972	0.975
	evm.model.Contig324.107	-0.091	0.92	0.925
	evm.model.Contig324.105	-0.232	0.968	0.97
	evm.model.Contig110.47	-0.558	0.989	0.99
HCT	evm.model.Contig4.33	-0.616	0.981	0.98
	evm.model.Contig280.68	-0.561	0.99	0.989
C3'H	evm.model.Contig374.36	-0.494	0.996	0.997
CHI	evm.model.Contig317.48	-0.393	0.996	0.997
	evm.model.Contig319.126	-0.318	0.985	0.987
F3H	evm.model.Contig281.218	-0.607	0.97	0.969
F3'H	evm.model.Contig418.464	-0.38	0.992	0.994
	evm.model.Contig401.234	-0.917	0.746	0.738
(B)
enzyme	geneID	Cinnamic acid	p-Coumaric acid	Caffeic acid	Ferulic acid
PAL	evm.model.Contig191.105	-0.369	-0.296	-0.571	-0.367
	evm.model.Contig191.106	-0.3	-0.226	-0.523	-0.294
C4H	evm.model.Contig308.202	-0.355	-0.282	-0.559	-0.353
4CL	evm.model.Contig386.40	-0.377	-0.304	-0.574	-0.374
	evm.model.Contig21.6	-0.502	-0.435	-0.684	-0.502
	evm.model.Contig428.373	0.888	0.851	0.959	0.886
COMT	evm.model.Contig386.133	-0.534	-0.469	-0.71	-0.532
	evm.model.Contig179.433	0.888	0.949	0.773	0.922
	evm.model.Contig281.153	-0.837	-0.809	-0.926	-0.853
	evm.model.Contig289.255	-0.467	-0.395	-0.656	-0.456
(C)
enzyme	geneID	γ-Aminobutyric acid	L-Citrulline	L-(+)-Arginine	5-Aminopentanoic acid
GPT	evm.model.Contig339.70	0.993	-0.65	0.962	0.947
	evm.model.Contig92.367	-0.715	0.992	-0.503	-0.877
GLT1	evm.model.Contig386.230	-0.453	0.963	-0.201	-0.685
NAGS	evm.model.Contig273.43	-0.603	0.995	-0.367	-0.799
ArgC	evm.model.Contig332.117	0.988	-0.573	0.983	0.911
ArgD	evm.model.Contig280.133	0.329	-0.921	0.065	0.579
ACY1	evm.model.Contig290.142	0.975	-0.792	0.888	0.982
	evm.model.Contig281.196	0.383	-0.939	0.127	0.626
OTC	evm.model.Contig120.291	0.665	-0.991	0.442	0.835
argG	evm.model.Contig104.465	-0.556	0.99	-0.313	-0.77
ProB	evm.model.Contig317.286	-0.57	0.968	-0.336	-0.78
	evm.model.Contig179.808	-0.669	0.989	-0.447	-0.84
ODC1	evm.model.Contig40.356	-0.792	0.977	-0.601	-0.926
ALDH	evm.model.Contig68.427	0.824	-0.962	0.644	0.941
	evm.model.Contig68.59	0.966	-0.581	0.955	0.898
PutB	evm.model.Contig194.133	-0.226	-0.568	-0.477	0.059
GAD	evm.model.Contig100.72	0.223	-0.863	-0.045	0.482
enzyme	geneID	L-Homocystine	L-Methionine	S-(5'-Adenosy)-L-homocysteine	L-(-)-Threonine	2,6-Diaminoopimelic acid	L-(+)-Lysine	L-Asparagine
COT1	evm.model.Contig120.160	0.987	0.99	0.98	-0.572	-0.748	0.984	-0.727
	evm.model.Contig283.202	0.986	0.988	0.981	-0.628	-0.793	0.969	-0.774
ASNB	evm.model.Contig247.176	-0.71	-0.689	-0.715	0.98	0.996	-0.584	0.997
asd	evm.model.Contig332.117	0.975	0.985	0.973	-0.461	-0.656	0.998	-0.632
thrC	evm.model.Contig264.74	-0.826	-0.814	-0.825	0.909	0.969	-0.728	0.972
metB	evm.model.Contig418.196	-0.294	-0.271	-0.32	0.935	0.842	-0.122	0.854
metC	evm.model.Contig243.89	0.846	0.821	0.837	-0.903	-0.972	0.752	-0.965
BHMT	evm.model.Contig254.103	0.899	0.901	0.944	-0.772	-0.889	0.864	-0.876
	evm.model.Contig40.474	0.979	0.985	0.98	-0.661	-0.819	0.956	-0.801
metK	evm.model.Contig380.76	-0.956	-0.956	-0.961	0.746	0.879	-0.915	0.867
DNMT1	evm.model.Contig238.233	-0.766	-0.745	-0.77	0.955	0.993	-0.651	0.988
	evm.model.Contig428.673	-0.679	-0.684	-0.676	0.803	0.846	-0.605	0.879
	evm.model.Contig268.49	-0.928	-0.947	-0.926	0.288	0.503	-0.986	0.482
	evm.model.Contig326.22	-0.948	-0.94	-0.916	0.363	0.564	-0.982	0.541
	evm.model.Contig332.8	-0.835	-0.855	-0.828	0.075	0.305	-0.932	0.276
ahcY	evm.model.Contig158.20	-0.712	-0.737	-0.701	-0.141	0.094	-0.832	0.064
dapA	evm.model.Contig136.99	0.781	0.765	0.782	-0.953	-0.994	0.667	-0.993
dapE	evm.model.Contig290.142	0.972	0.968	0.967	-0.7	-0.848	0.941	-0.831
	evm.model.Contig281.196	0.406	0.372	0.41	-0.976	-0.902	0.245	-0.914
dapF	evm.model.Contig179.678	-0.286	-0.255	-0.3	0.947	0.844	-0.114	0.862
lysA	evm.model.Contig284.69	-0.53	-0.503	-0.543	0.998	0.956	-0.374	0.966
enzyme	geneID	L-Valine
ilvC	evm.model.Contig349.70	0.636
ilvE	evm.model.Contig236.7	-0.732
	evm.model.Contig352.46	0.99
enzyme	geneID	L-Serine
serA	evm.model.Contig2.54	0.885
serB	evm.model.Contig418.450	0.984
enzyme	geneID	L-Histidine
hisG	evm.model.Contig229.64	-0.023
	evm.model.Contig229.63	0.749
hisA	evm.model.Contig178.187	-0.351
enzyme	geneID	L-(-)-Tyrosine	L-Tyramine
aroK	evm.model.Contig239.78	-0.522	-0.626
aroC	evm.model.Contig418.613	-0.771	-0.847
CM	evm.model.Contig120.124	-0.83	-0.892
ADT	evm.model.Contig428.537	-0.784	-0.846
TAT	evm.model.Contig236.6	0.575	0.678
	evm.model.Contig389.26	0.832	0.815

## Sheet: Table S5
Table S5. MYB transcription factors that potentially regulate metabolites. (A) Flavonoid pathway; (B) Polyphenols pathway; (C) Amino acids pathway.
(A)MYB transcription factors involved Flavonoid pathway			(B)MYB transcription factors involved Polyphenols pathway				(C)MYB transcription factors involved Amino acids pathway
Chlorogenic acid	Dihydroquercetin(Taxifolin)	Naringenin chalcone	Cinnamic acid	p-Coumaric acid	Caffeic acid	Ferulic acid	γ-Aminobutyric acid	L-Citrulline	L-(+)-Arginine	5-Aminopentanoic acid	2,6-Diaminoopimelic acid	L-Homocystine	L-Methionine	S-(5'-Adenosy)-L-homocysteine	L-(-)-Threonine	L-(+)-Lysine	L-Asparagine	L-Valine	L-Serine	L-Histidine	L-(-)-Tyrosine	L-Tyramine
evm.model.Contig418.287	evm.model.Contig231.137	evm.model.Contig231.137	evm.model.Contig418.287	evm.model.Contig418.287	evm.model.Contig418.287	evm.model.Contig418.287	evm.model.Contig418.287	evm.model.Contig231.137	evm.model.Contig319.35	evm.model.Contig418.287	evm.model.Contig231.137	evm.model.Contig418.287	evm.model.Contig418.287	evm.model.Contig418.287	evm.model.Contig231.137	evm.model.Contig290.142	evm.model.Contig231.137	evm.model.Contig418.287	evm.model.Contig231.137	evm.model.Contig418.287	evm.model.Contig100.63	evm.model.Contig100.63
evm.model.Contig144.143	evm.model.Contig40.132	evm.model.Contig40.132	evm.model.Contig144.143	evm.model.Contig144.143	evm.model.Contig285.2	evm.model.Contig144.143	evm.model.Contig144.143	evm.model.Contig40.132	evm.model.Contig80.203	evm.model.Contig144.143	evm.model.Contig40.132	evm.model.Contig144.143	evm.model.Contig339.51	evm.model.Contig144.143	evm.model.Contig40.132	evm.model.Contig418.287	evm.model.Contig40.132	evm.model.Contig144.143	evm.model.Contig40.132	evm.model.Contig144.143
evm.model.Contig100.63	evm.model.Contig363.386	evm.model.Contig363.386	evm.model.Contig100.63	evm.model.Contig100.63	evm.model.Contig144.143	evm.model.Contig100.63	evm.model.Contig285.2	evm.model.Contig363.386	evm.model.Contig418.287	evm.model.Contig285.2	evm.model.Contig363.386	evm.model.Contig285.2	evm.model.Contig144.143	evm.model.Contig285.2	evm.model.Contig363.386	evm.model.Contig339.51	evm.model.Contig363.386	evm.model.Contig264.174	evm.model.Contig363.386	evm.model.Contig100.63
evm.model.Contig380.130	evm.model.Contig120.270	evm.model.Contig120.270	evm.model.Contig361.14	evm.model.Contig361.14	evm.model.Contig100.63	evm.model.Contig361.14	evm.model.Contig264.174	evm.model.Contig120.270	evm.model.Contig144.143	evm.model.Contig104.305	evm.model.Contig120.270	evm.model.Contig324.197	evm.model.Contig285.2	evm.model.Contig324.197	evm.model.Contig120.270	evm.model.Contig144.143	evm.model.Contig120.270	evm.model.Contig380.130	evm.model.Contig120.270	evm.model.Contig361.14
evm.model.Contig191.1	evm.model.Contig230.23	evm.model.Contig230.23	evm.model.Contig380.130	evm.model.Contig380.130	evm.model.Contig361.14	evm.model.Contig380.130	evm.model.Contig100.63	evm.model.Contig230.23	evm.model.Contig264.174	evm.model.Contig100.63	evm.model.Contig230.23	evm.model.Contig428.22	evm.model.Contig324.197	evm.model.Contig319.35	evm.model.Contig230.23	evm.model.Contig264.174	evm.model.Contig230.23	evm.model.Contig361.15	evm.model.Contig230.23	evm.model.Contig191.1
	evm.model.Contig422.120	evm.model.Contig422.120	evm.model.Contig191.1	evm.model.Contig191.1	evm.model.Contig380.130	evm.model.Contig361.15	evm.model.Contig380.130	evm.model.Contig422.120	evm.model.Contig100.63	evm.model.Contig380.130	evm.model.Contig422.120	evm.model.Contig289.273	evm.model.Contig319.35	evm.model.Contig386.422	evm.model.Contig422.120	evm.model.Contig100.63	evm.model.Contig422.120	evm.model.Contig191.1	evm.model.Contig422.120
	evm.model.Contig284.212	evm.model.Contig284.212			evm.model.Contig191.1	evm.model.Contig191.1	evm.model.Contig120.279	evm.model.Contig284.212	evm.model.Contig380.130	evm.model.Contig120.279	evm.model.Contig284.212	evm.model.Contig264.174	evm.model.Contig386.422	evm.model.Contig428.22	evm.model.Contig284.212	evm.model.Contig361.14	evm.model.Contig285.2		evm.model.Contig284.212
	evm.model.Contig132.61	evm.model.Contig132.61					evm.model.Contig361.15	evm.model.Contig132.61	evm.model.Contig361.15	evm.model.Contig191.1	evm.model.Contig140.34	evm.model.Contig100.63	evm.model.Contig428.22	evm.model.Contig418.339	evm.model.Contig132.61	evm.model.Contig380.130	evm.model.Contig284.212		evm.model.Contig132.61
	evm.model.Contig355.35	evm.model.Contig140.34					evm.model.Contig191.1	evm.model.Contig140.34	evm.model.Contig191.1	evm.model.Contig290.61	evm.model.Contig179.739	evm.model.Contig386.325	evm.model.Contig418.339	evm.model.Contig289.273	evm.model.Contig355.35	evm.model.Contig120.279	evm.model.Contig132.61		evm.model.Contig355.35
	evm.model.Contig161.251	evm.model.Contig355.35					evm.model.Contig290.61	evm.model.Contig161.251			evm.model.Contig264.43	evm.model.Contig361.14	evm.model.Contig289.273	evm.model.Contig264.174	evm.model.Contig178.152	evm.model.Contig361.15	evm.model.Contig140.34		evm.model.Contig161.251
	evm.model.Contig178.152	evm.model.Contig161.251						evm.model.Contig179.739			evm.model.Contig289.177	evm.model.Contig380.130	evm.model.Contig264.174	evm.model.Contig100.63	evm.model.Contig179.739	evm.model.Contig191.1	evm.model.Contig355.35		evm.model.Contig178.152
	evm.model.Contig179.739	evm.model.Contig178.152						evm.model.Contig264.43			evm.model.Contig324.128	evm.model.Contig120.279	evm.model.Contig100.63	evm.model.Contig80.203	evm.model.Contig289.177		evm.model.Contig179.739		evm.model.Contig179.739
	evm.model.Contig264.43	evm.model.Contig179.739						evm.model.Contig289.177			evm.model.Contig415.76	evm.model.Contig361.15	evm.model.Contig80.203	evm.model.Contig381.8	evm.model.Contig195.143		evm.model.Contig264.43		evm.model.Contig264.43
	evm.model.Contig289.177	evm.model.Contig264.43						evm.model.Contig324.128			evm.model.Contig425.10	evm.model.Contig418.567	evm.model.Contig381.8	evm.model.Contig414.68	evm.model.Contig283.203		evm.model.Contig289.177		evm.model.Contig289.177
	evm.model.Contig324.128	evm.model.Contig289.177						evm.model.Contig415.76			evm.model.Contig73.124	evm.model.Contig191.1	evm.model.Contig414.68	evm.model.Contig386.325	evm.model.Contig195.140		evm.model.Contig195.143		evm.model.Contig195.143
	evm.model.Contig195.143	evm.model.Contig324.128						evm.model.Contig425.10			evm.model.Contig262.249	evm.model.Contig290.61	evm.model.Contig386.325	evm.model.Contig361.14	evm.model.Contig425.10		evm.model.Contig415.76		evm.model.Contig283.203
	evm.model.Contig415.76	evm.model.Contig195.143						evm.model.Contig73.124			evm.model.Contig194.76		evm.model.Contig361.14	evm.model.Contig380.130	evm.model.Contig73.124		evm.model.Contig425.10		evm.model.Contig425.10
	evm.model.Contig283.203	evm.model.Contig415.76						evm.model.Contig425.141			evm.model.Contig104.233		evm.model.Contig380.130	evm.model.Contig120.279	evm.model.Contig262.249		evm.model.Contig418.567		evm.model.Contig73.124
	evm.model.Contig425.10	evm.model.Contig283.203						evm.model.Contig262.249			evm.model.Contig54.33		evm.model.Contig120.279	evm.model.Contig361.15	evm.model.Contig194.76		evm.model.Contig73.124		evm.model.Contig262.249
	evm.model.Contig73.124	evm.model.Contig425.10						evm.model.Contig194.76					evm.model.Contig361.15	evm.model.Contig191.1	evm.model.Contig104.233		evm.model.Contig262.249		evm.model.Contig194.76
	evm.model.Contig262.249	evm.model.Contig73.124						evm.model.Contig104.233					evm.model.Contig191.1	evm.model.Contig290.61	evm.model.Contig54.33		evm.model.Contig194.76		evm.model.Contig104.233
	evm.model.Contig194.76	evm.model.Contig262.249						evm.model.Contig54.33					evm.model.Contig290.61				evm.model.Contig104.233		evm.model.Contig54.33
	evm.model.Contig104.233	evm.model.Contig194.76															evm.model.Contig54.33
	evm.model.Contig54.33	evm.model.Contig104.233
		evm.model.Contig54.33

## Sheet: Table S6
Table S6. Primer sequences for qRT-PCR analysis.
Genes	gene ID	Forward primer	Reverse primer
UBQ		ATGCAGATYTTTGTGAAGAC	ACCACCACGRAGACGGAG
C3'H	evm.model.Contig374.36	GCTCAGTCCTACGGACCCATCATATC	TCTTGACCGTCCTTGCTGAACTTTG
GPT	evm.model.Contig401.328	CTTCCCATCGTCCATGGCTAAC	GCCAAGAGACTGAGGATTTCCG
MetC	evm.model.Contig243.89	CGATAGACAGAGAGATGGATGTGAG	GCGTATTCATTGCATCGTAAGGATC
ArgC	evm.model.Contig332.117	GGCAGGTCTGTATCTTTGCTGTG	TGGAAGAACCGCTGAATTGTGG
COMT	evm.model.Contig386.133	CTAACCTACTCCTTGCGTACACTTC	AGCAGCAATGGAGACACCATCTTC
COT1	evm.model.Contig120.160	CCCACCTGATCCTATTCTTGGAG	GAAGCATAAGATCCTCTGCCTTC
COT1	evm.model.Contig283.202	GCTACCATTCTCAAGGATAGGGAC	GATTATGTGACTCCAGTCACCAGG
TYDC1	evm.model.Contig385.210	CATTTCTCACACGGTCCTGTCTG	TAAAGAGGTTGCTAGCAGTGCAGAG
ACY1	evm.model.Contig290.142	CTTCTGGGTTTAAGCCCACTCG	CGAGAACAATCCCAACGTTCAAG
OTC	evm.model.Contig21.5	CAGGCTGCGAAATTCTCACAG	TCTCCATACCACGTGCAACTTC
MYB62	evm.model.Contig418.287	AGAACAGCTGTTGATTCTTGACCTC	GAAACTCTGTGCTGTTGGTATCAATC
RAX3	evm.model.Contig144.143	CATTCAGATCATCACGACAATGTTGC	CTCAATCAGGCTAGCAGATGAGTG
REVEILLE 7	evm.model.Contig100. 63	CCTTGAAATTGTATGGCAGAGGTTG	CCATTGAGTTTACGTGGATAAGGATG
MYB105	evm.model.Contig361. 14	CTTCTGGAGATGAATCAGTACTTACC	GATCTTCTCCAGACATGGAAGAAAC
MYB108	evm.model.Contig380. 130	TGTCGGAGCTAACCGACTATTACAG	GAGTAACCAGATGGACTAGTCATGG
LHY	evm.model.Contig 191. 1	GAACAAAGACTGCTGTGCAGATC	ATGTTGGAGCAGCTTCACTAGAC
HCT	evm.model.Contig280.68	GTCTCCACTTTGTGAATACATGGTCTG	TGGAGCAGGTTGGTATTCAATGTGAG
4CL1	evm.model.Contig386.40	CTTCCCAACATCTCCAACCACCTC	CTTTGGTGATGCCAAGCTTGGAG
ahcY	evm.model.Contig158.20	CCTGCTATCAATGTCAACGACTCTG	ACATCACCATATCCACAGACAACAG
dapF	evm.model.Contig179.678	CCATGAGGTGTTTCCAGCAAGAAC	CAACTACAGCACAAGCACCAGTTC
lysA	evm.model.Contig284.69	ATGTCGATAGTGAGTTCGACTTGG	CATCAGGATGTTTCTTCACCTCATC
